# Supplementary material for: Deep eutectic solvents as sustainable media for multicomponent sulfonylation: an efficient strategy to synthesize (hetero)aryl sulfones
Source: Royal Society of Chemistry journal article supplement (doi:10.1039/d3gc04395a), 2024-01-01
Supplement: d3gc04395a1.pdf [file d3gc04395a1.pdf]

## Supporting Information

### Deep eutectic solvents as sustainable media for multicomponent sulfonylation: an efficient strategy to synthesize (hetero)aryl sulfones

Haibo Zhu,<sup>\*a</sup> Yangbo Zhong,<sup>a</sup> Liyuan Yan,<sup>a</sup> Honglei Zhang,<sup>a</sup> Yajing Shen,<sup>b</sup> Zhanggao Le,<sup>a</sup> Qiangwen Fan,<sup>\*a</sup> Zongbo Xie,<sup>\*a</sup>

<sup>a</sup> Jiangxi Province Key Laboratory of Synthetic Chemistry, East China University of Technology, Nanchang, 330013

<sup>b</sup> Institute of Zhejiang University-Quzhou, Quzhou 324000

E-mail: hbzhu@ecut.edu.cn, fanqw2019@ecut.edu.cn, zbxie@ecut.edu.cn

## Contents

|                                                                                  |    |
|----------------------------------------------------------------------------------|----|
| 1. General .....                                                                 | 2  |
| 2. Experimental sections .....                                                   | 2  |
| 2.1 Optimization studies.....                                                    | 2  |
| 2.2 Preparation of DES. ....                                                     | 4  |
| 2.3 General procedures for sulfones in deep eutectic solvents. ....              | 4  |
| 3. Characterization of compounds.....                                            | 4  |
| 4. <sup>1</sup> H NMR spectra and <sup>13</sup> C NMR spectra for compounds..... | 17 |
| 5. References .....                                                              | 59 |

## 1. General

All commercial reagents were used directly without further purification, unless otherwise stated. DMSO-*d*<sub>6</sub> and CDCl<sub>3</sub> were purchased from Shanghai aladdin Biochemical Technology Co., Ltd. All Schlenk tubes and sealed vessels (50 mL) were purchased from Beijing Synthware Glass. <sup>1</sup>H NMR and <sup>13</sup>C NMR spectra were recorded on a Bruker Avance III-500 spectrometer (Swiss Bruker, Switzerland). The following abbreviations were used to describe NMR signals: s = singlet, d = doublet, t = triplet, m = multiplet, dd = doublet of doublets, q = quartet.

## 2. Experimental sections

### 2.1 Optimization studies

**Table S1** Optimization of reaction conditions<sup>a</sup>

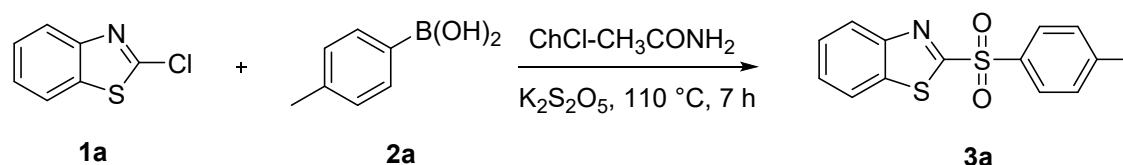

| Entry | 1a (mmol) | 2a (mmol) | DES (molar ratio)       | Temperature (°C) | Time (h) | Yield(%) <sup>b</sup> |
|-------|-----------|-----------|-------------------------|------------------|----------|-----------------------|
| 1     | 0.4       | 0.2       | ChCl:Acetamide (1:2)    | 100              | 4        | 31                    |
| 2     | 0.3       | 0.2       | ChCl:Acetamide (1:2)    | 100              | 4        | 30                    |
| 3     | 0.2       | 0.2       | ChCl:Acetamide(1:2)     | 100              | 4        | 28                    |
| 4     | 0.2       | 0.3       | ChCl:Acetamide (1:2)    | 100              | 4        | 34                    |
| 5     | 0.2       | 0.4       | ChCl:Acetamide (1:2)    | 100              | 4        | 58                    |
| 6     | 0.2       | 0.5       | ChCl:Acetamide (1:2)    | 100              | 4        | 61                    |
| 7     | 0.2       | 0.4       | ChCl:Acetamide (1:2)    | 90               | 4        | 45                    |
| 8     | 0.2       | 0.4       | ChCl:Acetamide (1:2)    | 100              | 4        | 58                    |
| 9     | 0.2       | 0.4       | ChCl:Acetamide (1:2)    | 110              | 4        | 74                    |
| 10    | 0.2       | 0.4       | ChCl:Acetamide (1:2)    | 120              | 4        | 76                    |
| 11    | 0.2       | 0.4       | ChCl:Acetamide (1:2)    | 110              | 3        | 52                    |
| 12    | 0.2       | 0.4       | ChCl:Acetamide (1:2)    | 110              | 5        | 77                    |
| 13    | 0.2       | 0.4       | ChCl:Acetamide (1:2)    | 110              | 7        | 81                    |
| 14    | 0.2       | 0.4       | ChCl:Acetamide (1:2)    | 110              | 9        | 79                    |
| 15    | 0.2       | 0.4       | Betaine:Acetamide (1:2) | 110              | 7        | 32                    |
| 16    | 0.2       | 0.4       | ChCl:Glucose (1:2)      | 110              | 7        | 0                     |
| 17    | 0.2       | 0.4       | ChCl:Oxalate (1:2)      | 110              | 7        | 0                     |
| 18    | 0.2       | 0.4       | ChCl:Citrate (1:2)      | 110              | 7        | 0                     |
| 19    | 0.2       | 0.4       | ChCl:Glycol (1:2)       | 110              | 7        | 0                     |

|    |     |     |                                    |     |   |    |
|----|-----|-----|------------------------------------|-----|---|----|
| 20 | 0.2 | 0.4 | ChCl:Urea (1:2)                    | 110 | 7 | 0  |
| 20 | 0.2 | 0.4 | ChCl:Glycerin (1:2)                | 110 | 7 | 25 |
| 21 | 0.2 | 0.4 | ChCl:Sorbitol (1:2)                | 110 | 7 | 0  |
| 22 | 0.2 | 0.4 | ChCl:SnCl <sub>4</sub> (1:2)       | 110 | 7 | 18 |
| 23 | 0.2 | 0.4 | ChC: Tartaric (1:2)                | 110 | 7 | 0  |
| 24 | 0.2 | 0.4 | ZnCl <sub>2</sub> :Acetamide (1:2) | 110 | 7 | 45 |
| 25 | 0.2 | 0.4 | ZnCl <sub>2</sub> :Urea (1:2)      | 110 | 7 | 0  |

<sup>a</sup> Reaction conditions: 2-chlorobenzothiazole **1a** (0.2 mmol), 4-methylbenzeneboronic acid **2a** (0.4 mmol) and K<sub>2</sub>S<sub>2</sub>O<sub>5</sub> (0.2 mmol) in 1 mL DES were heated to 110 °C with stirring for 7 h. <sup>b</sup> Isolated yield.

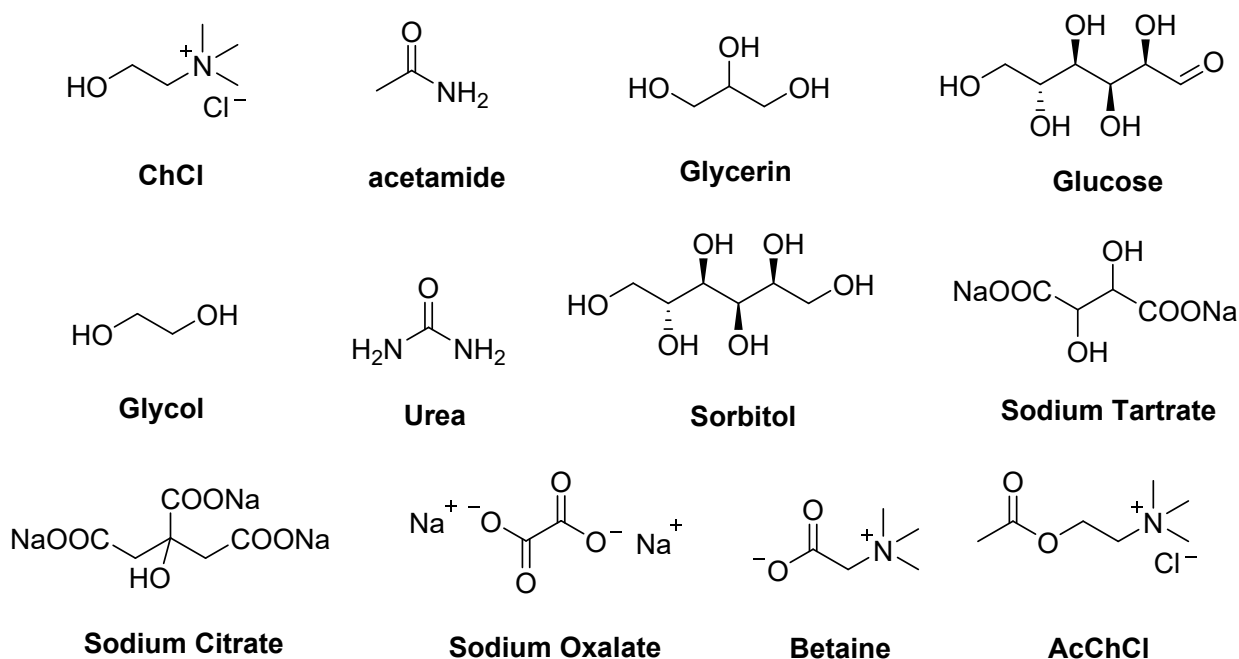

**Table S2** Study of SO<sub>2</sub> surrogates<sup>a</sup>

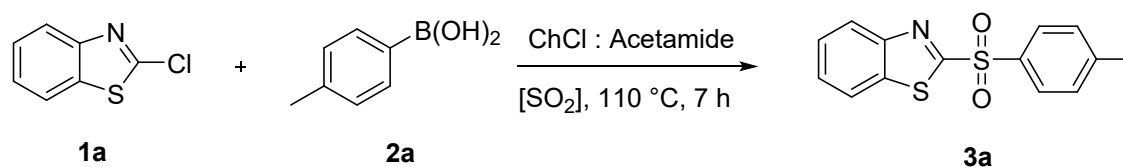

| Entry | SO <sub>2</sub> source                        | Yield (%) <sup>b</sup> |
|-------|-----------------------------------------------|------------------------|
| 1     | K <sub>2</sub> S <sub>2</sub> O <sub>5</sub>  | 81                     |
| 2     | Na <sub>2</sub> S <sub>2</sub> O <sub>5</sub> | 75                     |
| 3     | DABSO                                         | 32                     |
| 4     | NaO <sub>2</sub> SCH <sub>2</sub> OH          | trace                  |
| 5     | Na <sub>2</sub> SO <sub>3</sub>               | 54                     |
| 6     | NaHSO <sub>3</sub>                            | 42                     |

<sup>a</sup> Reaction conditions: 2-chlorobenzothiazole **1a** (0.2 mmol), 4-methylbenzeneboronic acid **2a** (0.4 mmol) and SO<sub>2</sub> surrogate (0.2 mmol) in 1 mL DES were heated to 110 °C with stirring for 7 h. <sup>b</sup> Isolated

yield.

**Table S3** Study of aryl boron reagents<sup>a</sup>

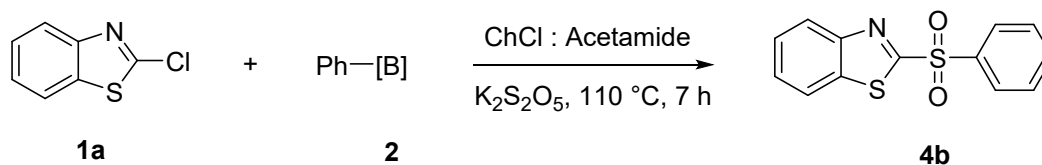

| Entry | Boron reagents        | Yield (%) <sup>b</sup> |
|-------|-----------------------|------------------------|
| 1     | Ph-B(OH) <sub>2</sub> | 78                     |
| 2     | Ph-Bpin               | 35                     |
| 3     | Ph-BF <sub>3</sub> K  | 12                     |

<sup>a</sup> Reaction conditions: 2-chlorobenzothiazole **1a** (0.2 mmol), phenyl boron reagent **2** (0.4 mmol) and K<sub>2</sub>S<sub>2</sub>O<sub>5</sub> (0.2 mmol) in 1 mL DES were heated to 110 °C with stirring for 7 h. <sup>b</sup> Isolated yield.

## 2.2 Preparation of DES.

A 1:2 molar ratio of ChCl/acetamide was heated with stirring until a clear colorless liquid was obtained. The mixture was used without further purification.<sup>[1]</sup>

## 2.3 General procedures for sulfones in deep eutectic solvents.

To a 50 mL test tube containing ChCl/acetamide (1 mL) was added 2-chlorobenzothiazole (**1a**) (0.2 mmol), *p*-methylphenylboronic acid (**2a**) (2.0 equiv.) and K<sub>2</sub>S<sub>2</sub>O<sub>5</sub> (2.0 equiv.). The resulting mixture was stirred at 110 °C for 7 h. The progress of the reaction was monitored by TLC (PE/EtOAc 4:1 v/v). After completion of the reaction, the mixture was cooled to room temperature and diluted with water (5 mL) and extracted with ethyl acetate (2×5 mL). The organic phases were dried over sodium sulfate. Filtration of the drying agent, and removal of all volatiles in vacuo gave a residue. Directly purified by flash chromatography to give the desired product.

## 3. Characterization of compounds

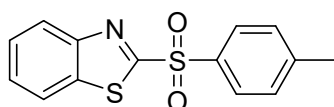

(**3a**) Light yellow solid, mp: 130.5-132.8 °C

$^1\text{H}$  NMR (500 MHz,  $\text{CDCl}_3$ )  $\delta$  8.15 (d,  $J = 9.3$  Hz, 1H), 8.04 (d,  $J = 8.3$  Hz, 2H), 7.95 (d,  $J = 8.6$  Hz, 1H), 7.54 (dt,  $J = 15.0, 7.8$  Hz, 2H), 7.37 (d,  $J = 8.0$  Hz, 2H), 2.43 (s, 3H).;  $^{13}\text{C}$  NMR (126 MHz,  $\text{CDCl}_3$ )  $\delta$  167.66, 152.90, 145.97, 137.02, 135.43, 130.24, 129.03, 127.83, 127.49, 125.52, 122.23, 21.80.

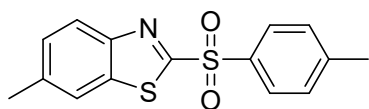

**(3b)** Light yellow solid, mp: 138.9-139.8 °C

$^1\text{H}$  NMR (500 MHz,  $\text{CDCl}_3$ )  $\delta$  8.02 (t,  $J = 8.1$  Hz, 3H), 7.73 (s, 1H), 7.37 (d,  $J = 8.1$  Hz, 3H), 2.51 (s, 3H), 2.43 (s, 3H);  $^{13}\text{C}$  NMR (126 MHz,  $\text{CDCl}_3$ )  $\delta$  166.34, 151.08, 145.82, 138.55, 137.31, 135.64, 130.20, 129.31, 128.94, 124.96, 121.65, 21.82, 21.78.

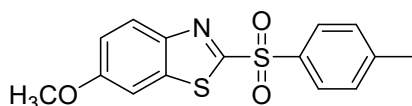

**(3c)** Light yellow solid, mp: 146.0-149.3 °C

$^1\text{H}$  NMR (500 MHz,  $\text{CDCl}_3$ )  $\delta$  8.01 (dd,  $J = 8.7, 7.4$  Hz, 3H), 7.36 (d,  $J = 8.3$  Hz, 2H), 7.33 (d,  $J = 2.5$  Hz, 1H), 7.15 (dd,  $J = 9.1, 2.5$  Hz, 1H), 3.88 (s, 3H), 2.42 (s, 3H);  $^{13}\text{C}$  NMR (126 MHz,  $\text{CDCl}_3$ )  $\delta$  164.32, 159.62, 147.46, 145.72, 139.00, 135.79, 130.19, 128.85, 126.16, 118.01, 103.38, 55.93, 21.78.

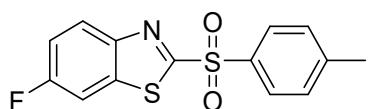

**(3d)** Light yellow solid, mp: 165.3-167.1 °C

$^1\text{H}$  NMR (500 MHz,  $\text{CDCl}_3$ )  $\delta$  8.11 (dd,  $J = 9.5, 5.0$  Hz, 1H), 8.03 (d,  $J = 8.5$  Hz, 2H), 7.63 (dd,  $J = 8.0, 3.0$  Hz, 1H), 7.39 (d,  $J = 8.0$  Hz, 2H), 7.31 (td,  $J = 9.0, 2.5$  Hz, 1H), 2.44 (s, 3H);  $^{13}\text{C}$  NMR (126 MHz,  $\text{CDCl}_3$ )  $\delta$  167.30, 167.27, 162.68, 160.68, 149.45, 146.09, 135.65, 135.10, 130.24, 128.94, 126.85, 126.78, 116.92, 116.72, 108.31, 108.09, 21.73.  $^{19}\text{F}$  NMR ( $\text{CDCl}_3$ , 376 MHz, 298 K)  $\delta = -110.41$ .

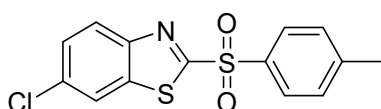

**(3e)** Light yellow solid, mp: 181.9-183.6 °C

$^1\text{H}$  NMR (500 MHz,  $\text{CDCl}_3$ )  $\delta$  8.04 (dd,  $J = 8.5, 7.4$  Hz, 3H), 7.93 (d,  $J = 2.0$  Hz, 1H), 7.52 (dd,  $J = 8.8, 2.0$  Hz, 1H), 7.39 (d,  $J = 8.4$  Hz, 2H), 2.44 (s, 3H);  $^{13}\text{C}$  NMR (126 MHz,  $\text{CDCl}_3$ )  $\delta$  168.22, 151.39, 146.21, 138.07, 135.13, 134.09, 130.32, 129.08, 128.59, 126.28, 121.77, 21.82.

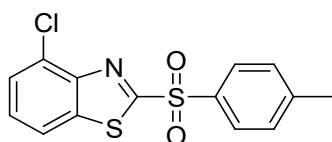

**(3f)** Light yellow solid, mp: 124.7-126.2 °C

$^1\text{H}$  NMR (500 MHz,  $\text{CDCl}_3$ )  $\delta$  8.06 (d,  $J = 8.1$  Hz, 2H), 7.83 (d,  $J = 8.1$  Hz, 1H), 7.57 (d,  $J = 7.7$  Hz, 1H), 7.44 (t,  $J = 8.0$  Hz, 1H), 7.38 (d,  $J = 8.0$  Hz, 2H), 2.43 (s, 3H);  $^{13}\text{C}$  NMR (126 MHz,  $\text{CDCl}_3$ )  $\delta$  168.34, 150.16, 146.11, 138.21, 134.98, 130.34, 130.18, 129.11, 128.26, 127.64, 120.65, 21.75.

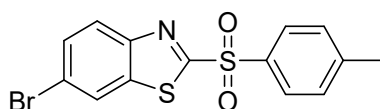

**(3g)** Light yellow solid, mp: 189.1-189.9 °C

$^1\text{H}$  NMR (500 MHz,  $\text{CDCl}_3$ )  $\delta$  8.10 (d,  $J = 1.1$  Hz, 1H), 8.03 (d,  $J = 8.2$  Hz, 2H), 7.99 (d,  $J = 8.8$  Hz, 1H), 7.67 (d,  $J = 8.8$  Hz, 1H), 7.39 (d,  $J = 8.1$  Hz, 2H), 2.44 (s, 3H);  $^{13}\text{C}$  NMR (126 MHz,  $\text{CDCl}_3$ )  $\delta$  168.13, 151.58, 146.18, 138.35, 135.65, 134.96, 130.26, 130.00, 128.73, 126.44, 124.68, 121.84, 21.75.

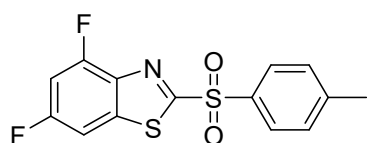

**(3h)** Light yellow solid, mp: 161.8-163.3 °C

$^1\text{H}$  NMR (500 MHz,  $\text{CDCl}_3$ )  $\delta$  8.04 (d,  $J = 8.3$  Hz, 2H), 7.45 (d,  $J = 7.3$  Hz, 1H), 7.40 (d,  $J = 8.2$  Hz, 2H), 7.07 (t,  $J = 8.4$  Hz, 1H), 2.45 (s, 3H);  $^{13}\text{C}$  NMR (126 MHz,  $\text{CDCl}_3$ )  $\delta$  167.85, 162.72, 160.65, 157.61, 155.52, 146.31, 139.65, 139.07, 134.73, 130.27, 129.10, 104.10, 103.80, 21.80.

$^{19}\text{F}$  NMR ( $\text{CDCl}_3$ , 376 MHz, 298 K)  $\delta = -106.53, -113.18$ .

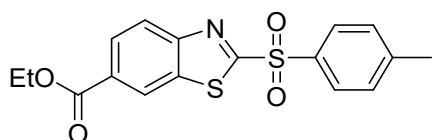

**(3i)** Light yellow solid, mp: 148.1-150.7 °C

$^1\text{H}$  NMR (500 MHz,  $\text{CDCl}_3$ )  $\delta$  8.61 (d,  $J = 1.3$  Hz, 1H), 8.15 (dd,  $J = 8.7, 1.5$  Hz, 1H), 8.09 (d,  $J = 8.7$  Hz, 1H), 7.98 (d,  $J = 8.3$  Hz, 2H), 7.32 (d,  $J = 8.3$  Hz, 2H), 4.35 (q,  $J = 7.1$  Hz, 2H), 2.37 (s, 3H), 1.35 (t,  $J = 7.1$  Hz, 3H);  $^{13}\text{C}$  NMR (126 MHz,  $\text{CDCl}_3$ )  $\delta$  169.89, 164.37, 154.41, 145.28, 135.72, 133.86, 129.29, 128.70, 128.15, 127.28, 124.19, 123.40, 60.70, 20.78, 13.28.

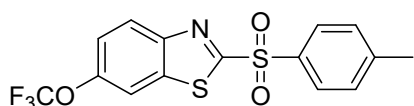

**(3j)** White solid, mp: 124.0-125.1 °C

$^1\text{H}$  NMR (500 MHz,  $\text{CDCl}_3$ )  $\delta$  8.16 (d,  $J = 9.1$  Hz, 1H), 8.03 (d,  $J = 8.2$  Hz, 2H), 7.82 (s, 1H), 7.44 (d,  $J = 9.0$  Hz, 1H), 7.39 (d,  $J = 7.9$  Hz, 2H), 2.44 (s, 3H);  $^{13}\text{C}$  NMR (126 MHz,  $\text{CDCl}_3$ )  $\delta$  168.89, 151.13, 148.13, 146.24, 137.82, 134.91, 130.27, 129.01, 126.61, 121.52, 114.30, 21.73.

$^{19}\text{F}$  NMR ( $\text{CDCl}_3$ , 376 MHz, 298 K)  $\delta = -57.94$ .

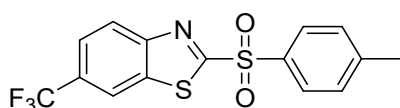

**(3k)** Light yellow solid, mp: 137.6-138.5 °C

$^1\text{H}$  NMR (500 MHz,  $\text{CDCl}_3$ )  $\delta$  8.30-8.23 (m, 2H), 8.05 (d,  $J = 8.2$  Hz, 2H), 7.80 (d,  $J = 8.6$  Hz, 1H), 7.40 (d,  $J = 8.1$  Hz, 2H), 2.45 (s, 3H);  $^{13}\text{C}$  NMR (126 MHz,  $\text{CDCl}_3$ )  $\delta$  171.06, 154.67, 146.44, 136.90, 134.78, 130.37, 129.83 (q,  $J_{\text{C-F}} = 32.76$  Hz), 129.20, 126.05, 124.33 (q,  $J_{\text{C-F}} = 3.78$  Hz), 123.60 (q,  $J_{\text{C-F}} = 273.42$  Hz), 120.14 (q,  $J_{\text{C-F}} = 3.78$  Hz), 21.82.

$^{19}\text{F}$  NMR ( $\text{CDCl}_3$ , 376 MHz, 298 K)  $\delta = -61.80$

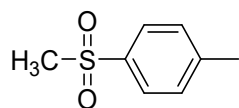

**(3m)** Light yellow solid, mp: 87.8-88.3 °C

<sup>1</sup>H NMR (500 MHz, CDCl<sub>3</sub>) δ 7.83 (d, *J* = 8.2 Hz, 2H), 7.37 (d, *J* = 8.1 Hz, 2H), 3.04 (s, 3H), 2.46 (s, 3H); <sup>13</sup>C NMR (126 MHz, CDCl<sub>3</sub>) δ 144.69, 137.67, 129.96, 127.36, 44.61, 21.62.

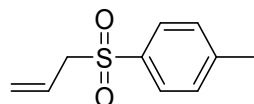

**(3n)** Light yellow solid, mp: 50.2-51.3 °C

<sup>1</sup>H NMR (500 MHz, CDCl<sub>3</sub>) δ 7.75 (d, *J* = 7.7 Hz, 2H), 7.35 (d, *J* = 7.7 Hz, 2H), 5.79 (td, *J* = 17.1, 7.5 Hz, 1H), 5.33 (d, *J* = 10.1 Hz, 1H), 5.15 (d, *J* = 17.1 Hz, 1H), 3.80 (d, *J* = 7.2 Hz, 2H), 2.45 (s, 3H); <sup>13</sup>C NMR (126 MHz, CDCl<sub>3</sub>) δ 144.78, 135.19, 129.70, 128.45, 124.76, 124.62, 60.88, 21.63.

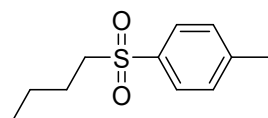

**(3o)** Light yellow liquid

<sup>1</sup>H NMR (500 MHz, CDCl<sub>3</sub>) δ 7.79 (d, *J* = 8.2 Hz, 2H), 7.36 (d, *J* = 8.1 Hz, 2H), 3.07 (dd, *J* = 9.7, 6.5 Hz, 2H), 2.46 (s, 3H), 1.71-1.64 (m, 2H), 1.42-1.34 (m, 2H), 0.89 (t, *J* = 7.4 Hz, 3H); <sup>13</sup>C NMR (126 MHz, CDCl<sub>3</sub>) δ 144.58, 136.22, 129.88, 128.09, 56.18, 24.72, 21.65, 21.56, 13.54.

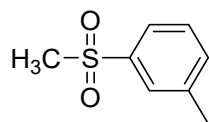

**(3p)** Light yellow solid, mp: 34.1-35.5 °C

<sup>1</sup>H NMR (500 MHz, CDCl<sub>3</sub>) δ 7.82-7.68 (m, 2H), 7.52-7.40 (m, 2H), 3.05 (s, 3H), 2.46 (s, 3H); <sup>13</sup>C NMR (126 MHz, CDCl<sub>3</sub>) δ 140.39, 139.71, 134.51, 129.27, 127.67, 124.45, 44.52, 21.36.



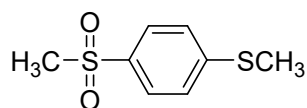

**(3q)** White solid, mp: 98.0-99.4 °C

$^1\text{H}$  NMR (500 MHz,  $\text{CDCl}_3$ )  $\delta$  7.82 (d,  $J = 8.5$  Hz, 2H), 7.35 (d,  $J = 8.5$  Hz, 2H), 3.04 (s, 3H), 2.54 (s, 3H);  $^{13}\text{C}$  NMR (126 MHz,  $\text{CDCl}_3$ )  $\delta$  147.25, 136.16, 127.67, 125.48, 44.71, 14.78.

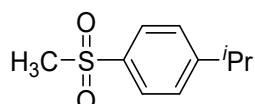

**(3r)** Light yellow liquid

$^1\text{H}$  NMR (500 MHz,  $\text{CDCl}_3$ )  $\delta$  7.86 (d,  $J = 8.3$  Hz, 2H), 7.42 (d,  $J = 8.3$  Hz, 2H), 3.05 (s, 3H), 1.28 (d,  $J = 7.0$  Hz, 6H);  $^{13}\text{C}$  NMR (126 MHz,  $\text{CDCl}_3$ )  $\delta$  155.37, 137.91, 127.52, 127.49, 44.60, 34.27, 23.66.

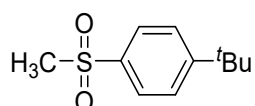

**(3s)** Light yellow solid, mp: 94.2-96.3 °C

$^1\text{H}$  NMR (500 MHz,  $\text{CDCl}_3$ )  $\delta$  7.87 (d,  $J = 8.3$  Hz, 2H), 7.58 (d,  $J = 8.3$  Hz, 2H), 3.05 (s, 3H), 1.36 (s, 9H);  $^{13}\text{C}$  NMR (126 MHz,  $\text{CDCl}_3$ )  $\delta$  157.65, 137.57, 127.24, 126.39, 44.60, 35.29, 31.09.

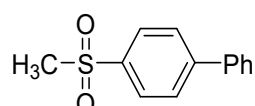

**(3t)** Light yellow solid, mp: 143.7-144.5 °C

$^1\text{H}$  NMR (500 MHz,  $\text{CDCl}_3$ )  $\delta$  8.01 (d,  $J = 8.1$  Hz, 2H), 7.78 (d,  $J = 8.0$  Hz, 2H), 7.62 (d,  $J = 7.6$  Hz, 2H), 7.50 (t,  $J = 7.3$  Hz, 2H), 7.46-7.42 (m, 1H), 3.10 (s, 3H);  $^{13}\text{C}$  NMR (126 MHz,  $\text{CDCl}_3$ )  $\delta$  146.75, 139.14, 139.07, 129.15, 128.73, 128.03, 127.96, 127.43, 44.67.

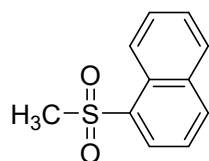

**(3u)** Light yellow solid, mp: 218.1-219.5 °C

$^1\text{H}$  NMR (500 MHz,  $\text{CDCl}_3$ )  $\delta$  8.72 (d,  $J = 8.6$  Hz, 1H), 8.33 (d,  $J = 7.3$  Hz, 1H), 8.12 (d,  $J = 8.2$  Hz, 1H), 7.97 (d,  $J = 8.2$  Hz, 1H), 7.77-7.68 (m, 1H), 7.67-7.51 (m, 2H), 3.21 (s, 3H);  $^{13}\text{C}$  NMR (126 MHz,  $\text{CDCl}_3$ )  $\delta$  135.53, 135.25, 134.21, 129.68, 129.39, 128.83, 128.64, 127.09, 124.51, 123.90, 44.29.

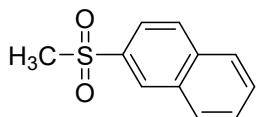

**(3v)** Light yellow solid, mp: 100.4-102.3 °C

$^1\text{H}$  NMR (500 MHz,  $\text{CDCl}_3$ )  $\delta$  8.53 (s, 1H), 8.01 (t,  $J = 9.3$  Hz, 2H), 7.92 (dd,  $J = 15.3, 8.3$  Hz, 2H), 7.66 (dt,  $J = 14.8, 7.0$  Hz, 2H), 3.13 (s, 3H);  $^{13}\text{C}$  NMR (126 MHz,  $\text{CDCl}_3$ )  $\delta$  137.40, 135.31, 132.18, 129.80, 129.45, 129.34, 129.10, 128.04, 127.84, 122.16, 44.60.

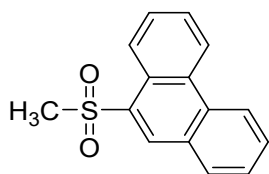

**(3w)** Light yellow solid, mp: 118.3-119.7 °C

$^1\text{H}$  NMR (500 MHz,  $\text{CDCl}_3$ )  $\delta$  8.78 (s, 2H), 8.69 (s, 2H), 8.03 (d,  $J = 6.8$  Hz, 1H), 7.86-7.66 (m, 4H), 3.27 (s, 3H);  $^{13}\text{C}$  NMR (126 MHz,  $\text{CDCl}_3$ )  $\delta$  134.17, 132.78, 132.65, 131.33, 130.79, 130.24, 129.24, 128.17, 127.82, 127.77, 126.19, 124.92, 123.73, 122.83, 44.17.

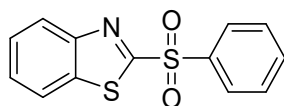

**(4b)** Light yellow solid, mp: 157.5-158.9 °C

$^1\text{H}$  NMR (500 MHz,  $\text{CDCl}_3$ )  $\delta$  8.17 (t,  $J = 6.8$  Hz, 3H), 7.96 (d,  $J = 8.1$  Hz, 1H), 7.67 (t,  $J = 7.4$  Hz, 1H), 7.61-7.52 (m, 4H);  $^{13}\text{C}$  NMR (126 MHz,  $\text{CDCl}_3$ )  $\delta$  167.26, 152.93, 138.47, 137.07, 134.63, 129.58, 128.98, 127.94, 127.57, 125.59, 122.26.

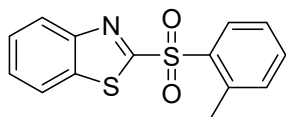

**(4c)** Light yellow solid, mp: 116.4-117.2 °C

$^1\text{H}$  NMR (500 MHz,  $\text{CDCl}_3$ )  $\delta$  8.29 (d,  $J = 8.0$  Hz, 1H), 8.14 (d,  $J = 8.7$  Hz, 1H), 7.96 (d,  $J = 7.5$  Hz, 1H), 7.61-7.51 (m, 3H), 7.44 (t,  $J = 7.6$  Hz, 1H), 7.32 (d,  $J = 7.6$  Hz, 1H), 2.74 (s, 3H);  $^{13}\text{C}$  NMR (101 MHz,  $\text{CDCl}_3$ )  $\delta$  167.70, 152.67, 139.76, 136.89, 136.71, 134.76, 132.96, 130.78, 127.86, 127.48, 126.87, 125.55, 122.19, 20.85.

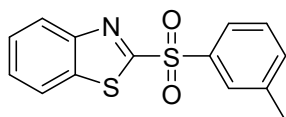

**(4d)** Light yellow solid, mp: 140.4-142.1 °C

$^1\text{H}$  NMR (400 MHz,  $\text{CDCl}_3$ )  $\delta$  8.16 (d,  $J = 8.0$  Hz, 1H), 7.96 (d,  $J = 8.2$  Hz, 3H), 7.56 (dt,  $J = 20.6, 7.4$  Hz, 2H), 7.46 (d,  $J = 5.4$  Hz, 2H), 2.44 (s, 3H);  $^{13}\text{C}$  NMR (126 MHz,  $\text{CDCl}_3$ )  $\delta$  167.41, 152.89, 139.93, 138.24, 137.05, 135.44, 129.40, 129.14, 127.85, 127.49, 126.10, 125.53, 122.21, 21.33.

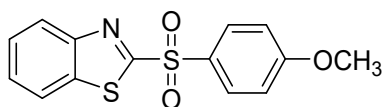

**(4e)** Light yellow solid, mp: 117.4-118.9 °C

$^1\text{H}$  NMR (400 MHz,  $\text{CDCl}_3$ )  $\delta$  8.14 (d,  $J = 8.1$  Hz, 1H), 8.09 (d,  $J = 8.9$  Hz, 2H), 7.95 (d,  $J = 8.0$  Hz, 1H), 7.54 (dt,  $J = 21.4, 7.3$  Hz, 2H), 7.03 (d,  $J = 8.9$  Hz, 2H), 3.87 (s, 3H);  $^{13}\text{C}$  NMR (126 MHz,  $\text{CDCl}_3$ )  $\delta$  168.03, 164.60, 152.96, 136.94, 131.35, 129.61, 127.75, 127.45, 125.45, 122.22, 114.88, 55.82.

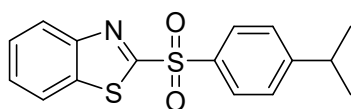

**(4f)** White solid, mp: 126.3-127.8 °C

$^1\text{H}$  NMR (500 MHz,  $\text{CDCl}_3$ )  $\delta$  8.16 (d,  $J = 8.1$  Hz, 1H), 8.08 (d,  $J = 8.3$  Hz, 2H), 7.96 (d,  $J = 8.0$  Hz, 1H), 7.55 (dt,  $J = 21.2, 7.3$  Hz, 2H), 7.42 (d,  $J = 8.3$  Hz, 2H), 3.02-2.93 (m, 1H), 1.25 (d,  $J = 6.9$  Hz,

6H);  $^{13}\text{C}$  NMR (126 MHz,  $\text{CDCl}_3$ )  $\delta$  167.66, 156.52, 152.93, 137.07, 135.67, 129.16, 127.83, 127.78, 127.50, 125.54, 122.25, 34.39, 23.57.

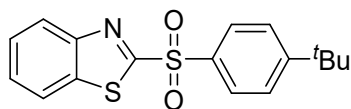

**(4g)** Light yellow solid, mp: 203.2-205.9 °C

$^1\text{H}$  NMR (500 MHz,  $\text{CDCl}_3$ )  $\delta$  8.17 (d,  $J = 8.1$  Hz, 1H), 8.08 (d,  $J = 8.4$  Hz, 2H), 7.96 (d,  $J = 7.9$  Hz, 1H), 7.62-7.50 (m, 4H), 1.32 (s, 9H);  $^{13}\text{C}$  NMR (126 MHz,  $\text{CDCl}_3$ )  $\delta$  167.67, 158.77, 152.94, 137.09, 135.35, 128.86, 127.82, 127.49, 126.68, 125.54, 122.24, 35.41, 31.00.

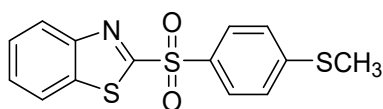

**(4h)** White solid, mp: 127.5-128.9 °C

$^1\text{H}$  NMR (500 MHz,  $\text{CDCl}_3$ )  $\delta$  8.15 (d,  $J = 8.2$  Hz, 1H), 8.02 (d,  $J = 8.6$  Hz, 2H), 7.96 (d,  $J = 8.1$  Hz, 1H), 7.55 (dt,  $J = 14.5, 6.8$  Hz, 2H), 7.34 (d,  $J = 8.6$  Hz, 2H), 2.51 (s, 3H);  $^{13}\text{C}$  NMR (126 MHz,  $\text{CDCl}_3$ )  $\delta$  167.55, 152.88, 148.87, 136.96, 133.61, 129.15, 127.82, 127.49, 125.48, 125.45, 122.20, 14.62.

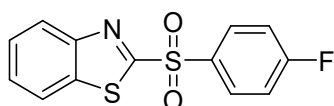

**(4i)** White solid, mp: 151.5-153.1 °C

$^1\text{H}$  NMR (500 MHz,  $\text{DMSO}-d_6$ )  $\delta$  8.23-8.13 (m, 3H), 7.97 (d,  $J = 7.7$  Hz, 1H), 7.62 – 7.52 (m, 2H), 7.26 (t,  $J = 8.5$  Hz, 2H);  $^{13}\text{C}$  NMR (126 MHz,  $\text{CDCl}_3$ )  $\delta$  167.01, 165.38 (d,  $J = 259.56$  Hz), 152.86, 134.40 (d,  $J = 2.52$  Hz), 132.06 (d,  $J = 5.04$  Hz), 128.00, 127.62, 125.53, 122.25, 117.08, 116.89.

$^{19}\text{F}$  NMR ( $\text{CDCl}_3$ , 376 MHz, 298 K)  $\delta = -101.40$ .

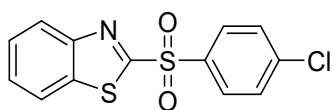

**(4j)** Light yellow solid, mp: 160.3-162.1 °C

$^1\text{H}$  NMR (500 MHz,  $\text{CDCl}_3$ )  $\delta$  8.15 (d,  $J = 7.9$  Hz, 1H), 8.10 (d,  $J = 8.7$  Hz, 2H), 7.97 (d,  $J = 8.1$  Hz, 1H), 7.61-7.54 (m, 4H);  $^{13}\text{C}$  NMR (126 MHz,  $\text{CDCl}_3$ )  $\delta$  166.77, 152.90, 141.60, 137.01, 136.86, 130.44, 129.96, 128.11, 127.70, 125.60, 122.30.

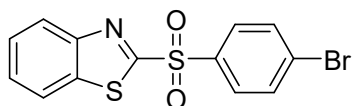

**(4k)** Light yellow solid, mp: 166.2-168.7 °C

$^1\text{H}$  NMR (500 MHz,  $\text{CDCl}_3$ )  $\delta$  8.16 (d,  $J = 8.5$  Hz, 1H), 8.02 (d,  $J = 8.7$  Hz, 2H), 7.97 (d,  $J = 8.6$  Hz, 1H), 7.73 (d,  $J = 8.7$  Hz, 2H), 7.57 (dt,  $J = 15.0, 6.7$  Hz, 2H);  $^{13}\text{C}$  NMR (126 MHz,  $\text{CDCl}_3$ )  $\delta$  166.69, 152.88, 137.40, 136.99, 132.90, 130.42, 130.26, 128.06, 127.66, 125.57, 122.25.

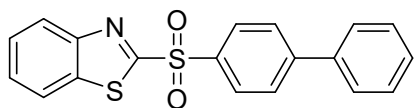

**(4l)** White solid, mp: 185.2-187.5 °C

$^1\text{H}$  NMR (500 MHz,  $\text{CDCl}_3$ )  $\delta$  8.22 (d,  $J = 8.4$  Hz, 2H), 8.17 (d,  $J = 8.3$  Hz, 1H), 7.97 (d,  $J = 8.4$  Hz, 1H), 7.77 (d,  $J = 8.5$  Hz, 2H), 7.61-7.52 (m, 4H), 7.47 (t,  $J = 7.3$  Hz, 2H), 7.44-7.40 (m, 1H);  $^{13}\text{C}$  NMR (126 MHz,  $\text{CDCl}_3$ )  $\delta$  167.43, 152.97, 147.62, 138.93, 137.09, 136.84, 129.54, 129.15, 128.89, 128.20, 127.93, 127.57, 127.46, 125.59, 122.27.

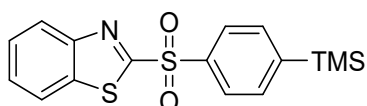

**(4m)** White solid, mp: 142.1-144.9 °C

$^1\text{H}$  NMR (500 MHz,  $\text{CDCl}_3$ )  $\delta$  8.16 (d,  $J = 7.7$  Hz, 1H), 8.11 (d,  $J = 7.5$  Hz, 2H), 7.96 (d,  $J = 7.5$  Hz, 1H), 7.72 (d,  $J = 7.5$  Hz, 2H), 7.55 (dd,  $J = 13.1, 7.9$  Hz, 2H), 0.28 (s, 9H);  $^{13}\text{C}$  NMR (126 MHz,  $\text{CDCl}_3$ )  $\delta$  168.83, 154.39, 151.16, 139.96, 138.55, 135.79, 129.33, 129.09, 128.97, 127.02, 123.69, 0.00.

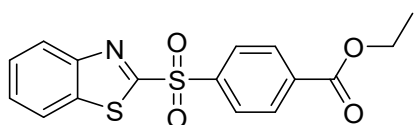

**(4n)** Light yellow solid, mp: 133.1-135.2 °C

$^1\text{H}$  NMR (500 MHz,  $\text{CDCl}_3$ )  $\delta$  8.24 (s, 4H), 8.16 (d,  $J = 8.1$  Hz, 1H), 7.98 (d,  $J = 7.8$  Hz, 1H), 7.62-7.53 (m, 2H), 4.41 (q,  $J = 7.1$  Hz, 2H), 1.40 (t,  $J = 7.1$  Hz, 3H);  $^{13}\text{C}$  NMR (126 MHz,  $\text{CDCl}_3$ )  $\delta$  166.49, 164.82, 152.93, 142.11, 137.09, 135.85, 130.59, 129.02, 128.16, 127.72, 125.65, 122.30, 61.92.

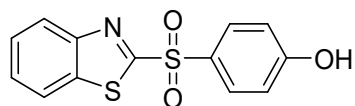

**(4o)** White solid, mp: 191.6-194.0 °C

$^1\text{H}$  NMR (500 MHz,  $\text{CDCl}_3$ )  $\delta$  11.04 (s, 1H), 8.25 (d,  $J = 54.5$  Hz, 2H), 7.81 (d,  $J = 144.3$  Hz, 4H), 7.16-6.93 (m, 2H);  $^{13}\text{C}$  NMR (126 MHz,  $\text{DMSO}-d_6$ )  $\delta$  168.89, 164.14, 152.70, 136.63, 131.83, 128.49, 128.39, 127.20, 125.20, 123.92, 117.12.

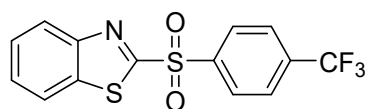

**(4p)** White solid, mp: 160.8-163.2 °C

$^1\text{H}$  NMR (500 MHz,  $\text{CDCl}_3$ )  $\delta$  8.31 (d,  $J = 8.2$  Hz, 2H), 8.17 (d,  $J = 8.1$  Hz, 1H), 7.99 (d,  $J = 7.8$  Hz, 1H), 7.86 (d,  $J = 8.3$  Hz, 2H), 7.64-7.55 (m, 2H);  $^{13}\text{C}$  NMR (126 MHz,  $\text{CDCl}_3$ )  $\delta$  166.14, 152.94, 142.04, 137.07, 136.05 (d,  $J_{\text{C-F}}=34.02$  Hz), 129.59, 128.25, 127.78, 126.66 (d,  $J_{\text{C-F}}=3.78$  Hz), 122.97 (d,  $J_{\text{C-F}}=273.42$  Hz), 125.68, 122.30.

$^{19}\text{F}$  NMR ( $\text{CDCl}_3$ , 376 MHz, 298 K)  $\delta = -63.30$ .

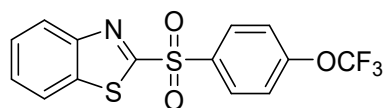

**(4q)** White solid, mp: 123.6-124.5 °C

$^1\text{H}$  NMR (500 MHz,  $\text{CDCl}_3$ )  $\delta$  8.23 (d,  $J = 8.7$  Hz, 2H), 8.17 (d,  $J = 8.1$  Hz, 1H), 7.98 (d,  $J = 7.9$  Hz, 1H), 7.58 (dt,  $J = 15.0, 7.2$  Hz, 2H), 7.40 (d,  $J = 8.5$  Hz, 2H);  $^{13}\text{C}$  NMR (126 MHz,  $\text{CDCl}_3$ )  $\delta$  166.67, 153.65, 152.94, 137.05, 136.58, 131.36, 128.13, 127.71, 125.63, 122.30, 121.13, 120.15 (q,  $J=260.82$  Hz).

$^{19}\text{F}$  NMR ( $\text{CDCl}_3$ , 376 MHz, 298 K)  $\delta = -57.61$ .

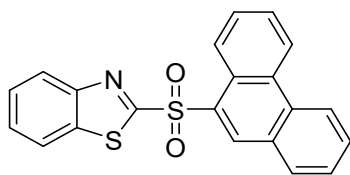

(4r) Light yellow solid, mp: 181.1-182.9 °C

$^1\text{H}$  NMR (500 MHz,  $\text{CDCl}_3$ )  $\delta$  9.02 (s, 1H), 8.98 (dd,  $J = 5.9, 3.7$  Hz, 1H), 8.68 (dd,  $J = 6.1, 3.4$  Hz, 1H), 8.64 (d,  $J = 8.4$  Hz, 1H), 8.08 (dd,  $J = 14.0, 7.8$  Hz, 2H), 7.90 (d,  $J = 8.1$  Hz, 1H), 7.81 (t,  $J = 7.7$  Hz, 1H), 7.73-7.66 (m, 3H), 7.53-7.45 (m, 2H);  $^{13}\text{C}$  NMR (126 MHz,  $\text{CDCl}_3$ )  $\delta$  167.34, 152.51, 137.05, 135.12, 133.23, 132.39, 131.26, 131.18, 130.80, 129.22, 128.03, 127.93, 127.87, 127.84, 127.49, 125.96, 125.82, 125.58, 123.37, 122.87, 122.18.

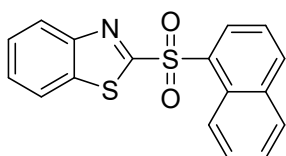

(4s) Light yellow solid, mp: 201.1-204.3 °C

$^1\text{H}$  NMR (500 MHz,  $\text{CDCl}_3$ )  $\delta$  8.99 (d,  $J=8.5$  Hz, 1H), 8.65 (d,  $J=7.5$  Hz, 1H), 8.17 (d,  $J=8.0$  Hz, 1H), 8.10 (d,  $J=7.5$ , 1H), 7.92 (d,  $J = 8.0$  Hz, 2H), 7.70-7.65 (m, 2H), 7.58 (t,  $J=7.5$  Hz, 1H), 7.54-7.48 (m, 2H);  $^{13}\text{C}$  NMR (126 MHz,  $\text{DMSO}-d_6$ )  $\delta$  167.37, 152.49, 136.98, 136.46, 134.15, 133.58, 131.61, 129.03, 128.84, 127.82, 127.39, 127.19, 125.54, 124.79, 124.53, 122.10.

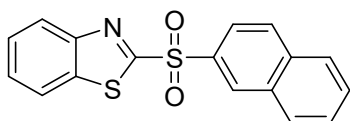

(4t) Light yellow solid, mp: 153.1-155.9 °C

$^1\text{H}$  NMR (500 MHz,  $\text{CDCl}_3$ )  $\delta$  8.77 (s, 1H), 8.17-8.07 (m, 2H), 8.00 (t,  $J = 10.0$  Hz, 2H), 7.94 (d,  $J = 7.9$  Hz, 1H), 7.89 (d,  $J = 8.1$  Hz, 1H), 7.64 (dt,  $J = 14.9, 7.2$  Hz, 2H), 7.58-7.49 (m, 2H);  $^{13}\text{C}$  NMR (126 MHz,  $\text{CDCl}_3$ )  $\delta$  167.31, 152.88, 137.02, 135.63, 135.20, 132.15, 131.11, 129.87, 129.84, 129.67, 127.99, 127.87, 127.85, 127.50, 125.51, 123.11, 122.19.

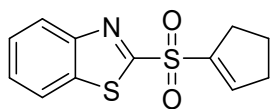

(4u) Light yellow solid, mp: 113.5-114.1 °C

<sup>1</sup>H NMR (500 MHz, CDCl<sub>3</sub>) δ 8.23 (d, *J* = 8.1 Hz, 1H), 8.01 (d, *J* = 8.0 Hz, 1H), 7.61 (dt, *J* = 22.7, 7.3 Hz, 2H), 7.11 (s, 1H), 2.79 (t, *J* = 6.6 Hz, 2H), 2.69-2.61 (m, 2H), 2.16-2.08 (m, 2H); <sup>13</sup>C NMR (126 MHz, CDCl<sub>3</sub>) δ 166.37, 152.96, 148.73, 142.24, 137.05, 127.91, 127.56, 125.56, 122.30, 33.49, 31.24, 23.69.

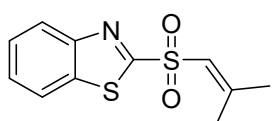

(4v) Light yellow solid, mp: 98.1-98.5 °C

<sup>1</sup>H NMR (500 MHz, CDCl<sub>3</sub>) δ 8.21 (d, *J* = 8.1 Hz, 1H), 8.00 (d, *J* = 8.1 Hz, 1H), 7.60 (dt, *J* = 16.3, 7.6 Hz, 2H), 6.42 (s, 1H), 2.30 (s, 3H), 2.01 (s, 3H); <sup>13</sup>C NMR (126 MHz, CDCl<sub>3</sub>) δ 168.31, 160.62, 152.87, 136.79, 127.79, 127.51, 125.43, 123.64, 122.28, 27.62, 20.15.

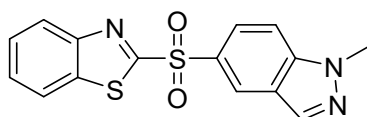

(4w) White solid, mp: 176.9-178.5 °C

<sup>1</sup>H NMR (500 MHz, CDCl<sub>3</sub>) δ 8.65 (s, 1H), 8.17 (s, 1H), 8.12 (t, *J* = 8.2 Hz, 2H), 7.95 (d, *J* = 8.1 Hz, 1H), 7.58-7.49 (m, 3H), 4.11 (s, 3H); <sup>13</sup>C NMR (126 MHz, CDCl<sub>3</sub>) δ 167.87, 152.88, 141.56, 136.93, 135.06, 130.34, 127.82, 127.50, 125.53, 125.46, 125.16, 123.58, 122.23, 110.24, 36.00.

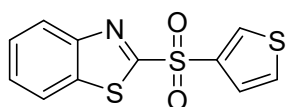

(4x) Light yellow solid, mp: 173.2-175.1 °C

<sup>1</sup>H NMR (500 MHz, CDCl<sub>3</sub>) δ 8.37 (dd, *J* = 3.0, 1.0 Hz, 1H), 8.18 (d, *J* = 8.0 Hz, 1H), 7.98 (d, *J* = 8.0 Hz, 1H), 7.61-7.54 (m, 3H), 7.47 (dd, *J* = 5.0, 3.0 Hz, 1H); <sup>13</sup>C NMR (126 MHz, CDCl<sub>3</sub>) δ 167.20,



152.86, 138.52, 137.04, 134.68, 128.74, 127.99, 127.62, 126.61, 125.58, 122.29.

#### 4. $^1\text{H}$ NMR spectra and $^{13}\text{C}$ NMR spectra for compounds

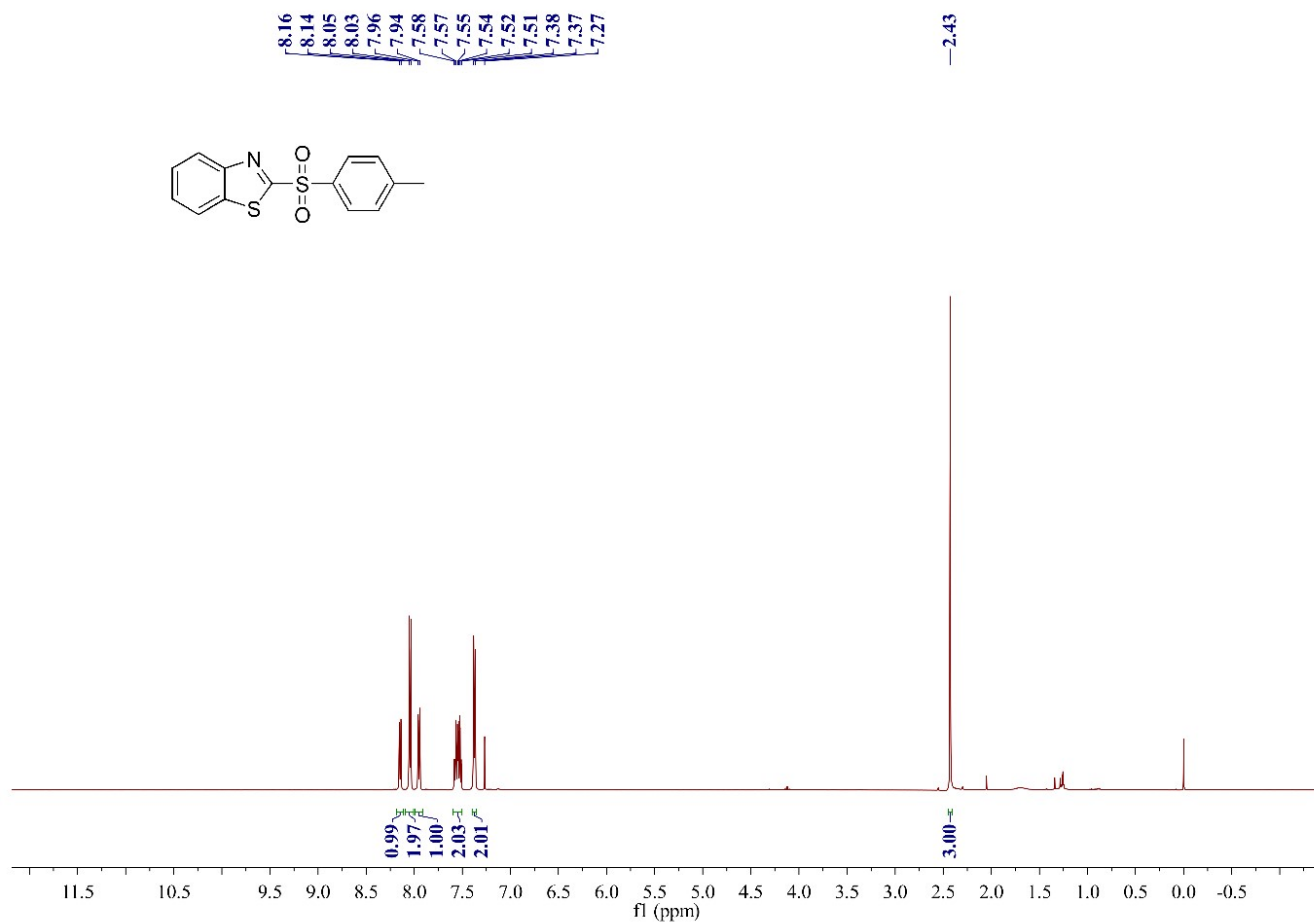

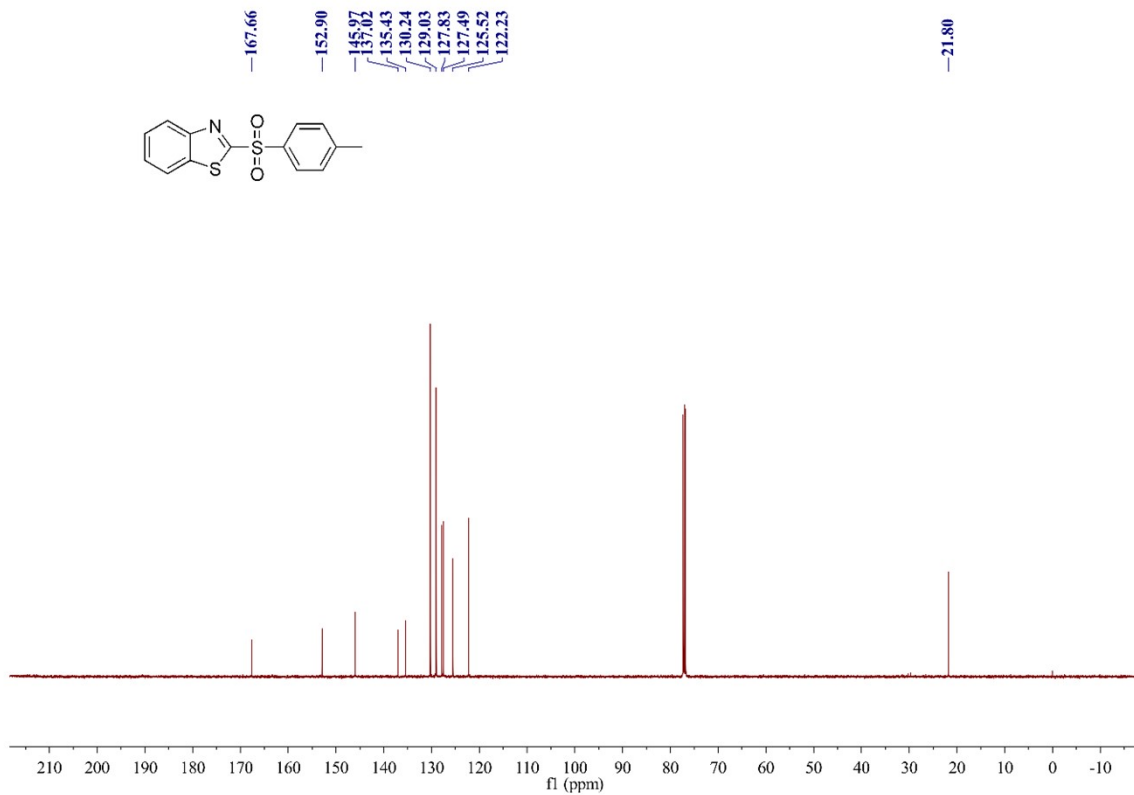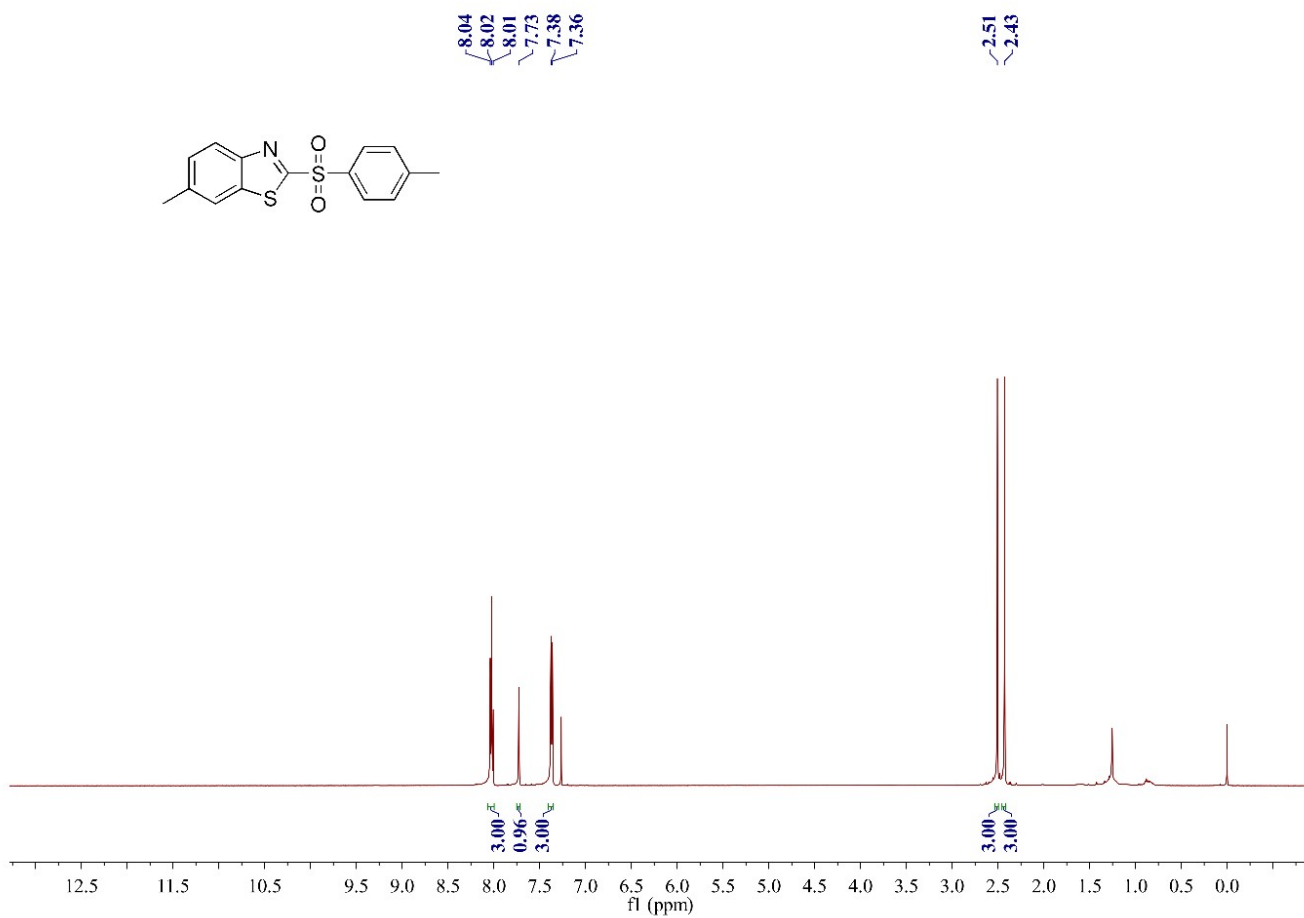

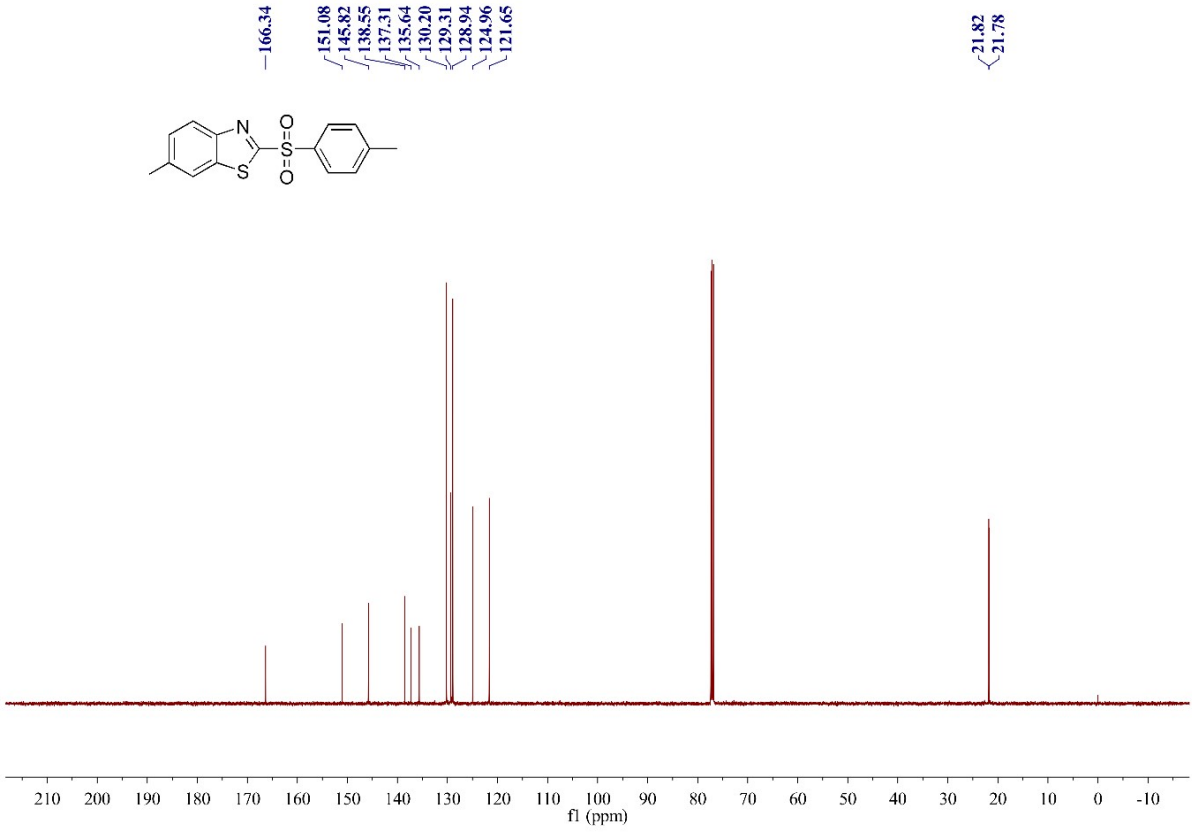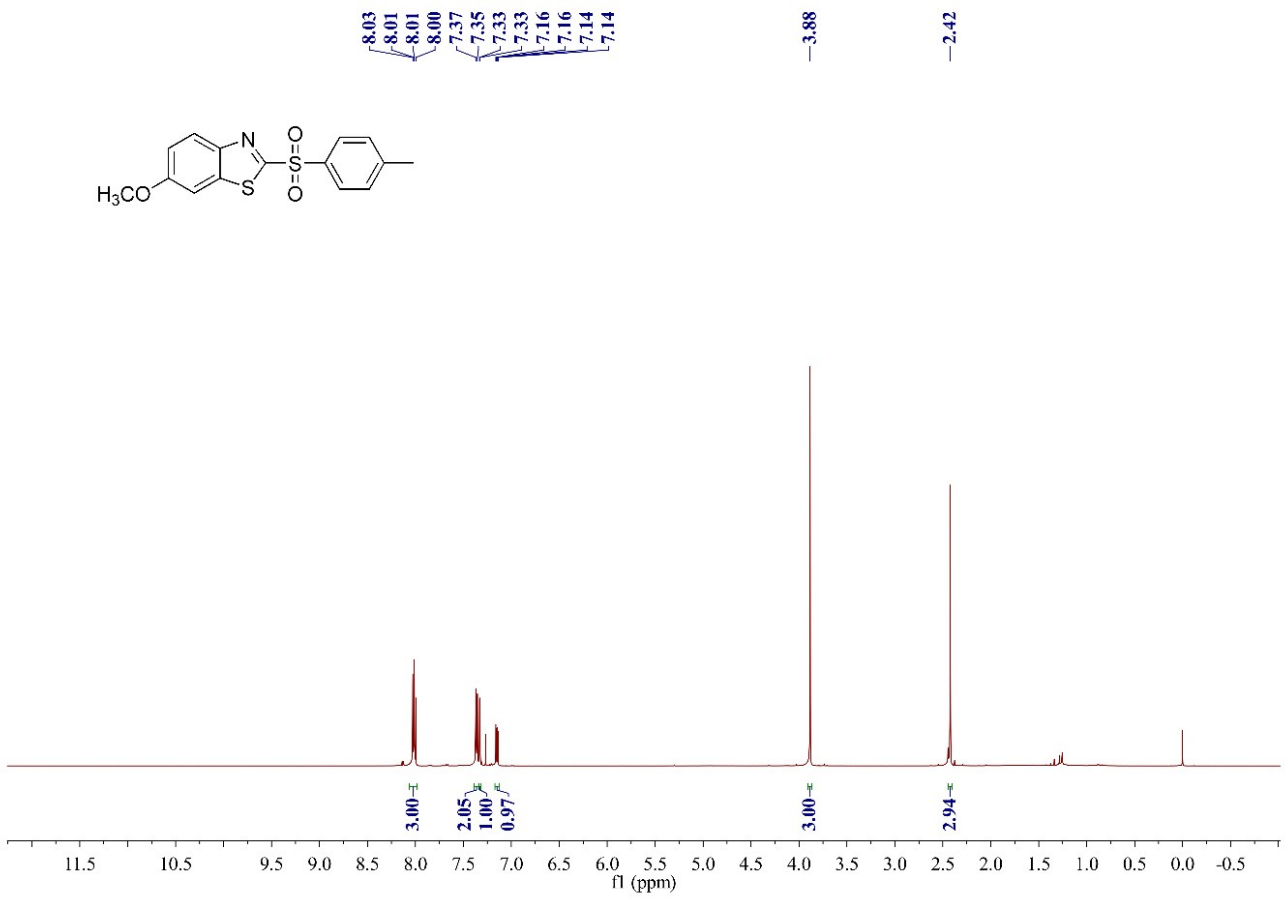

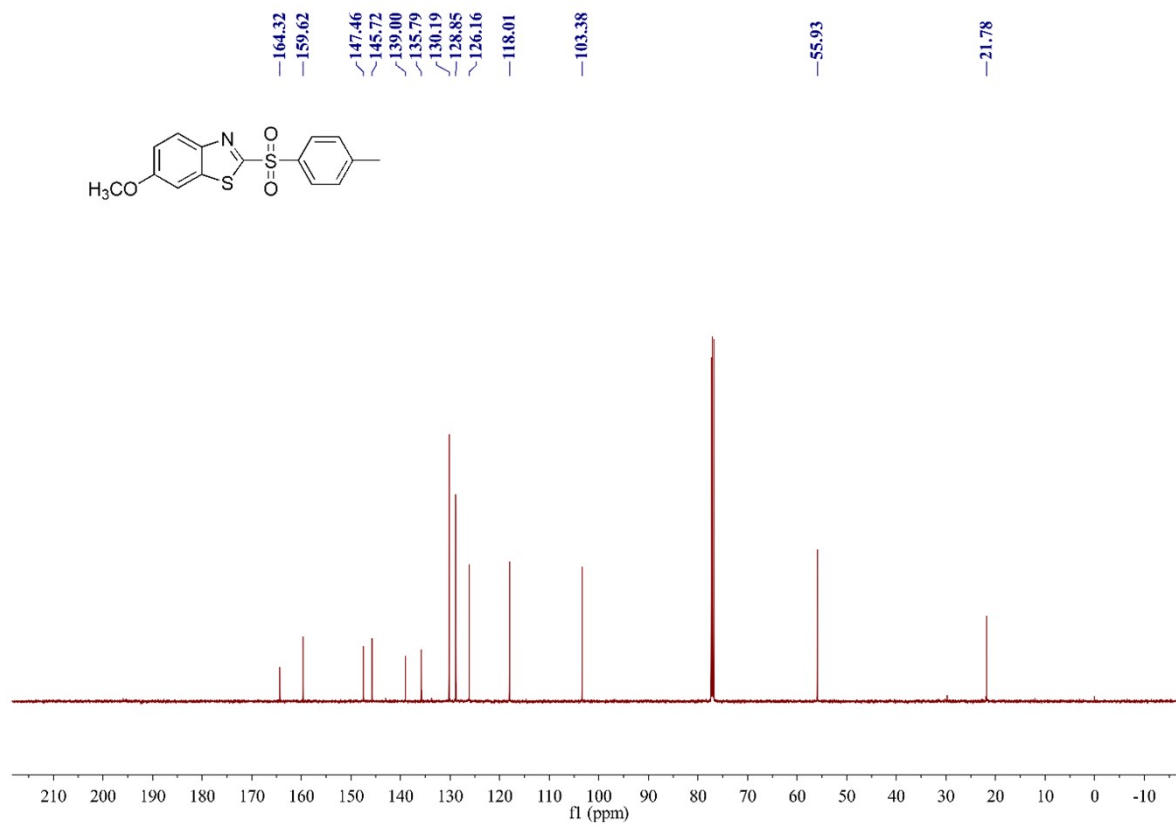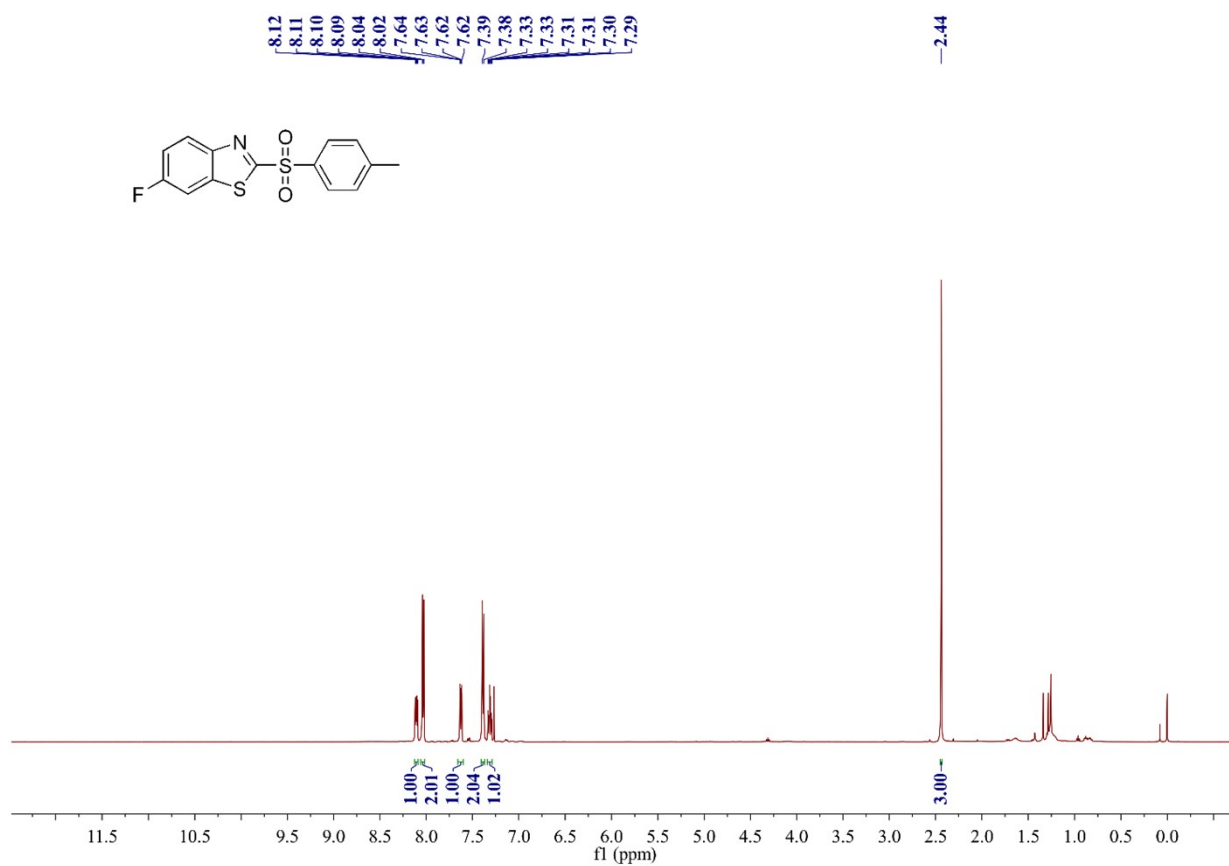

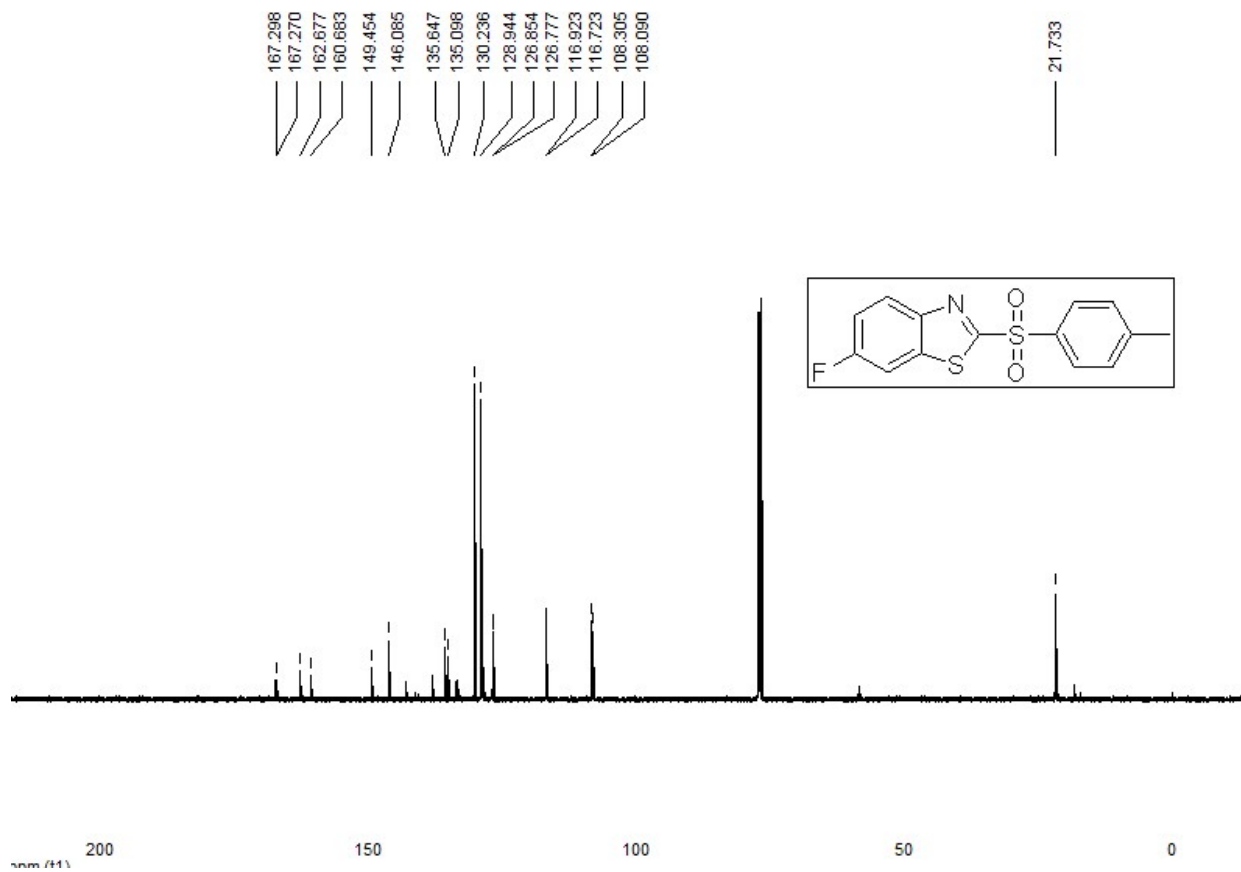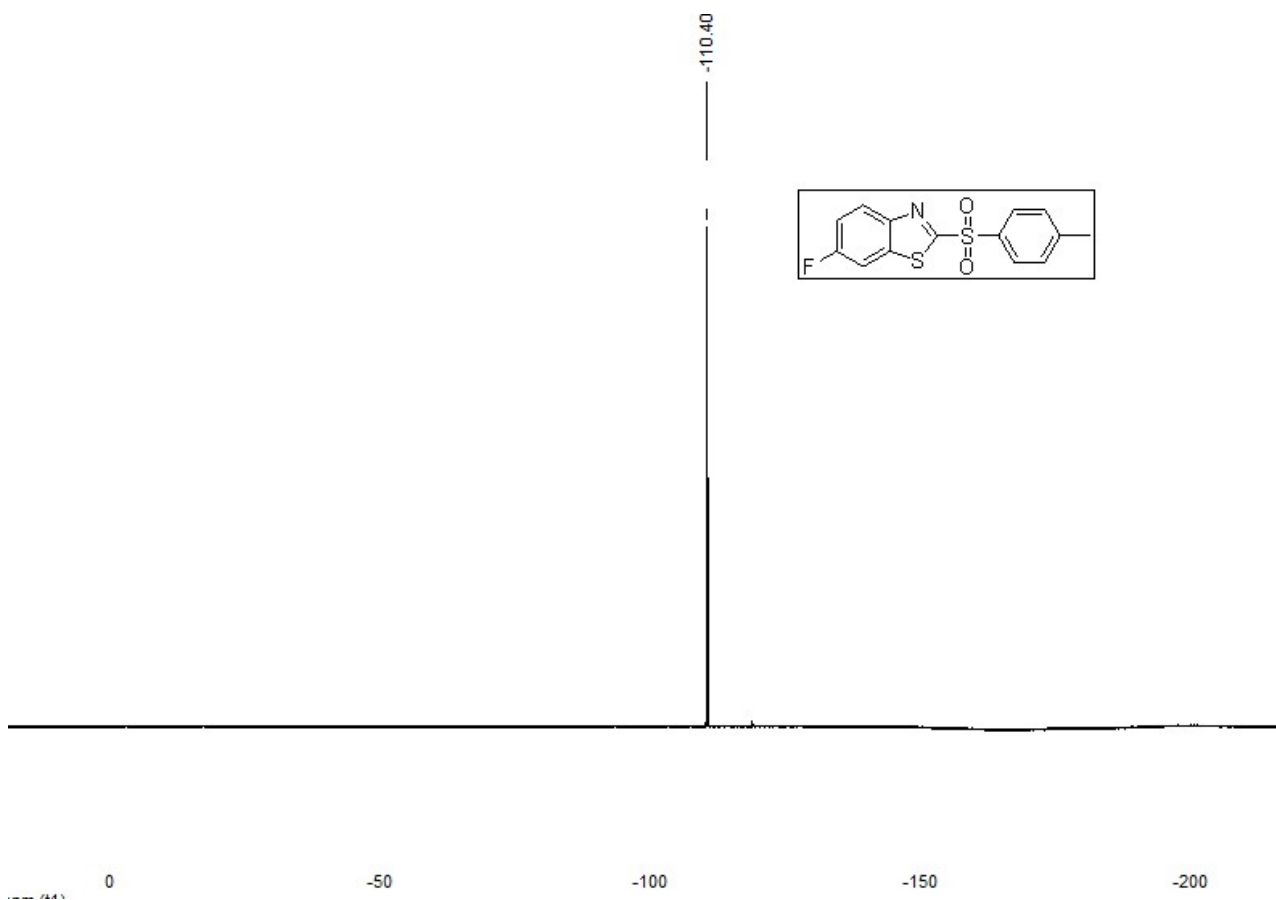

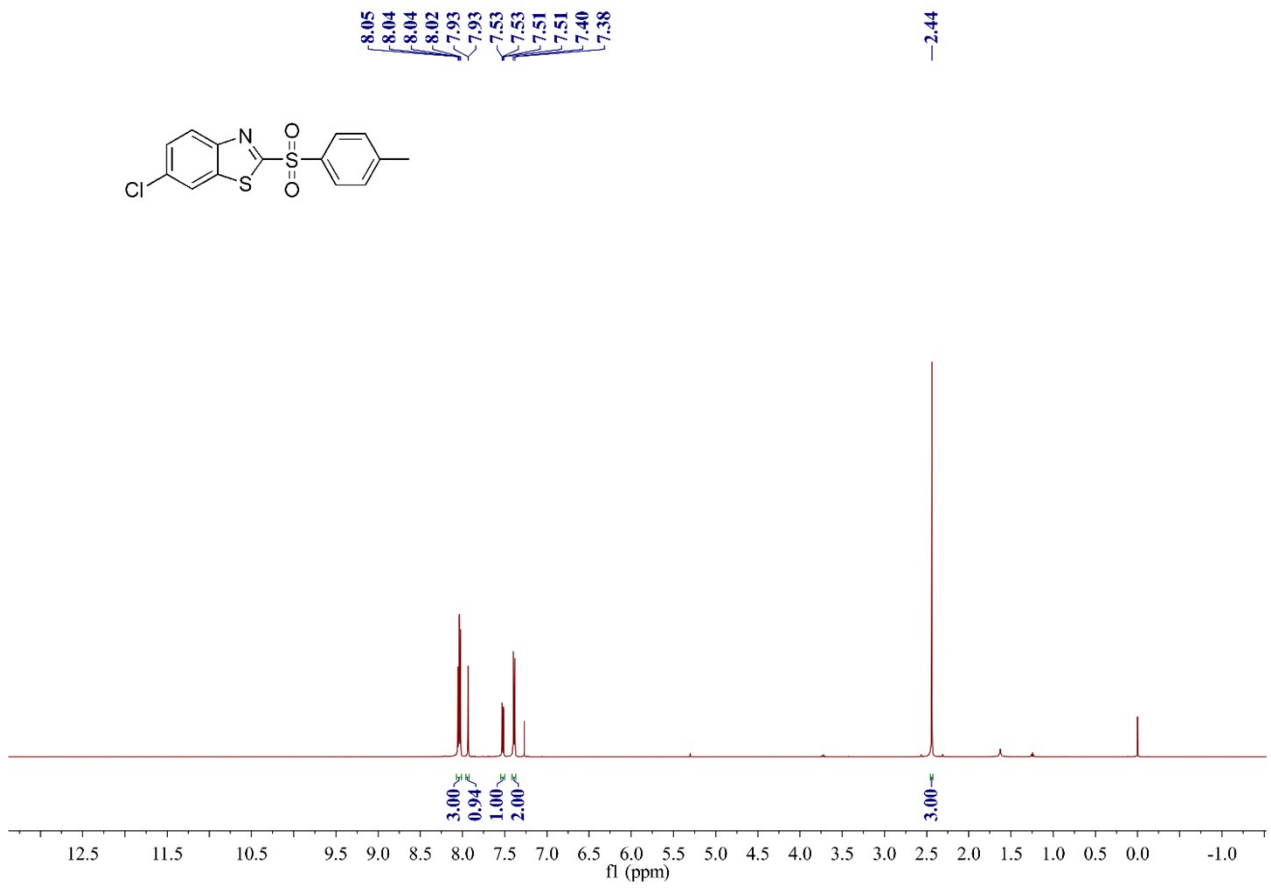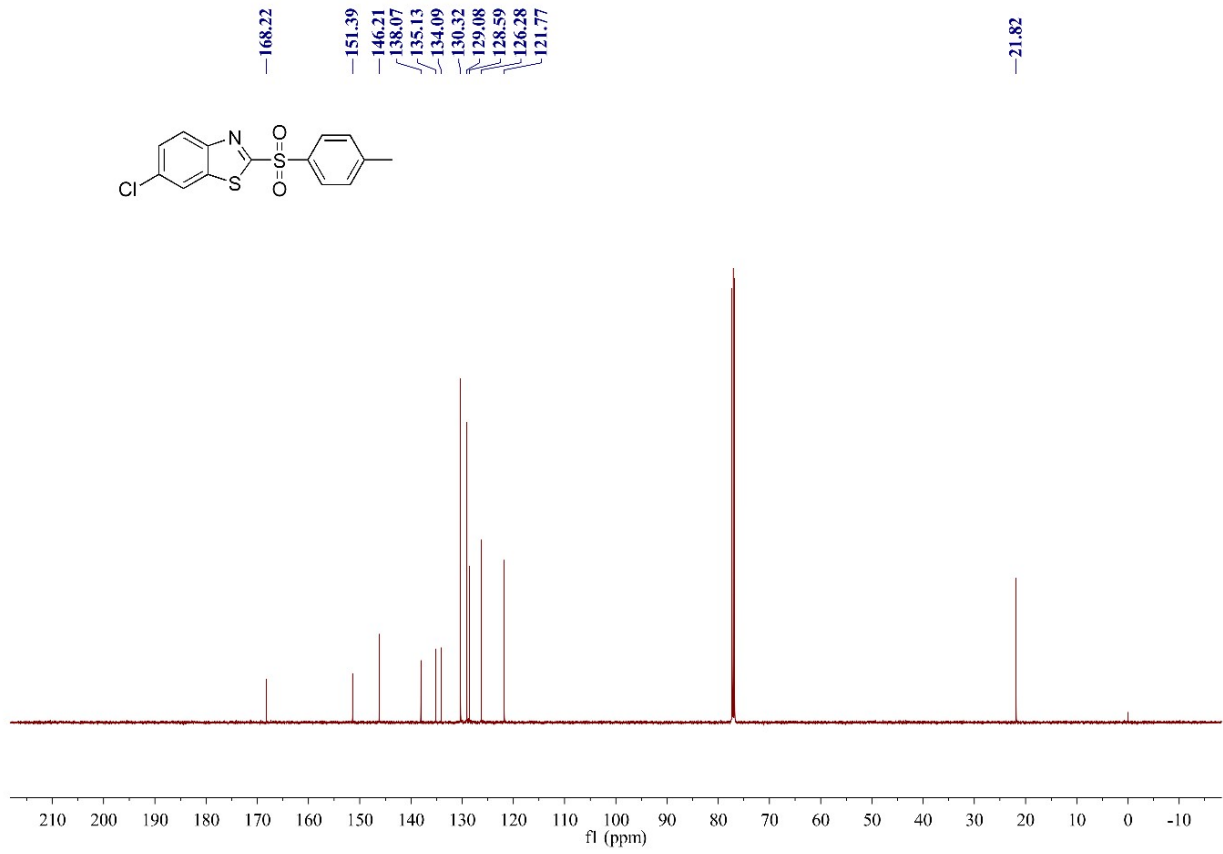

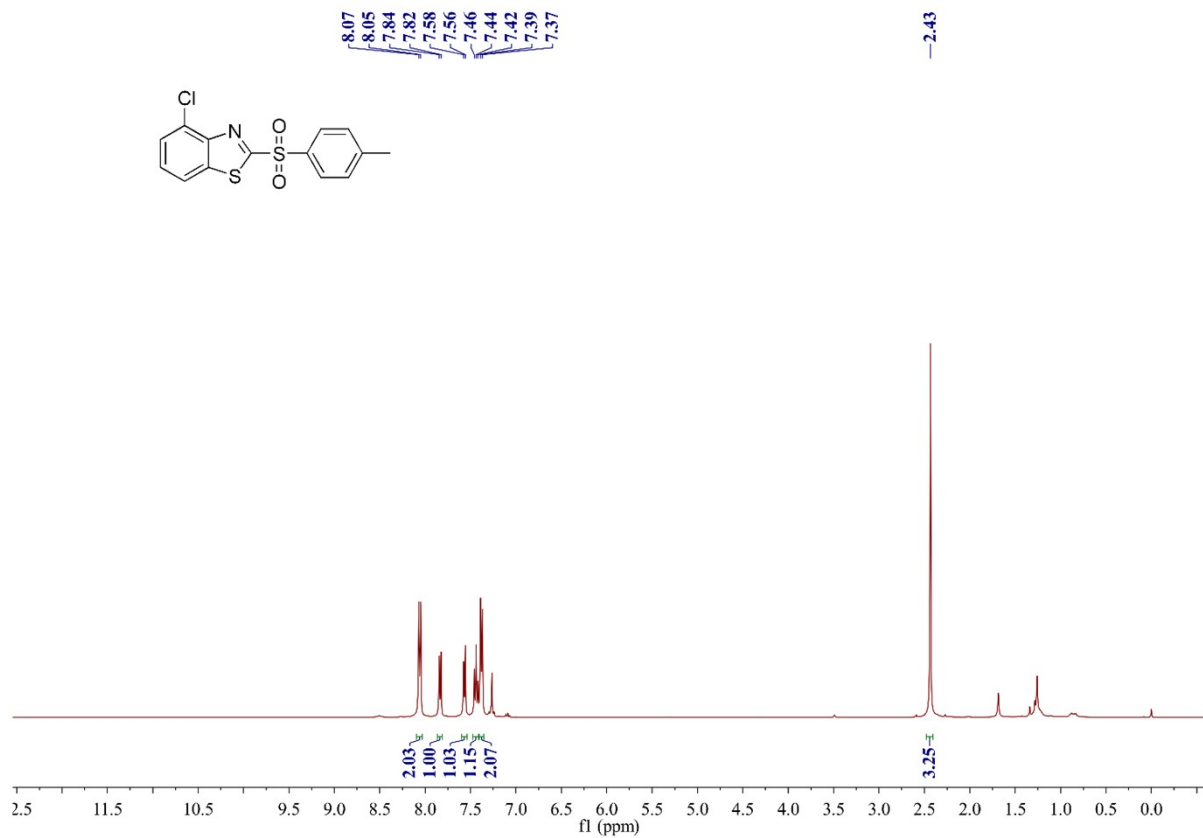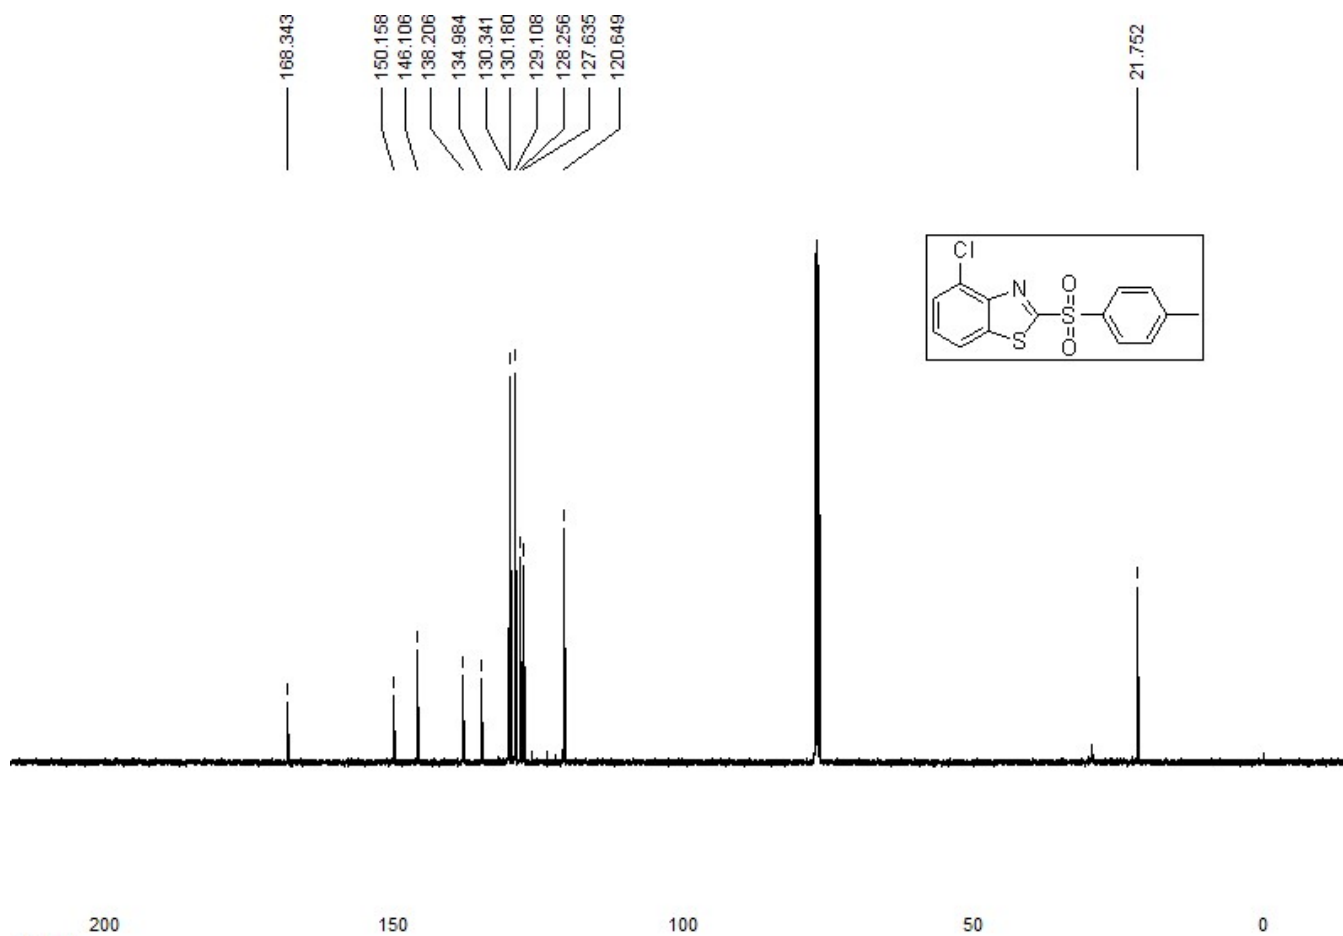

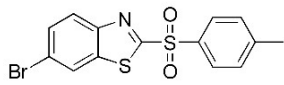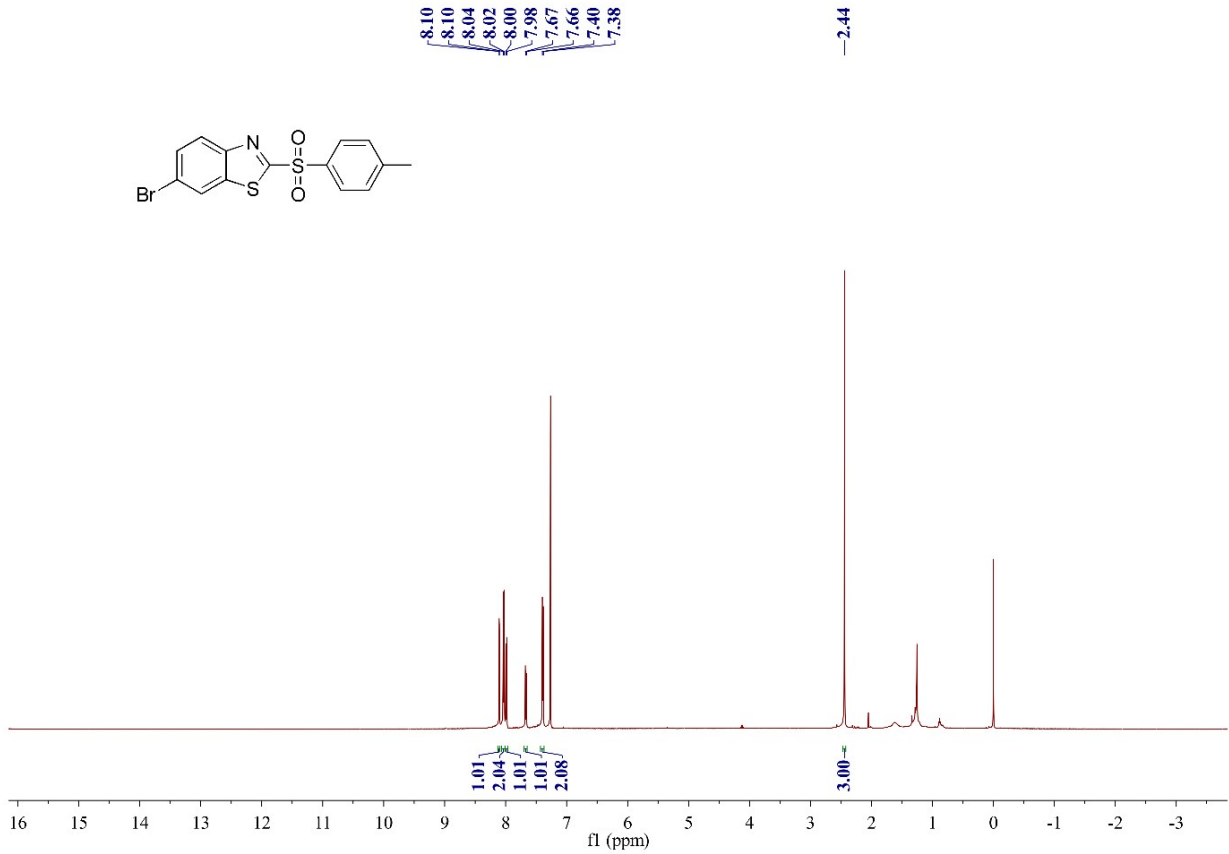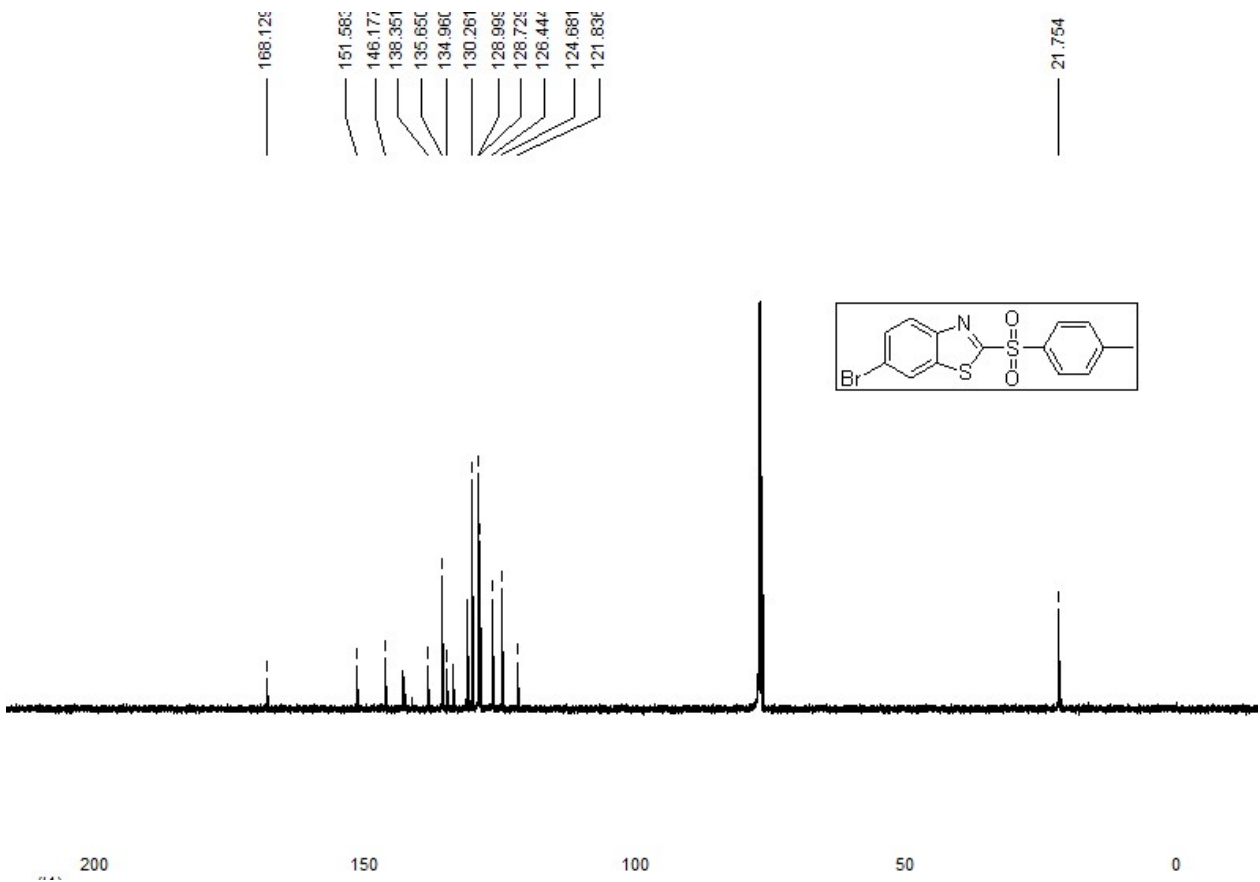



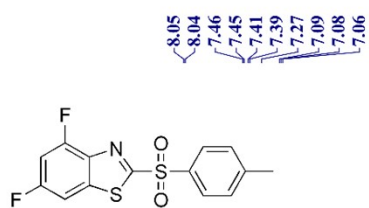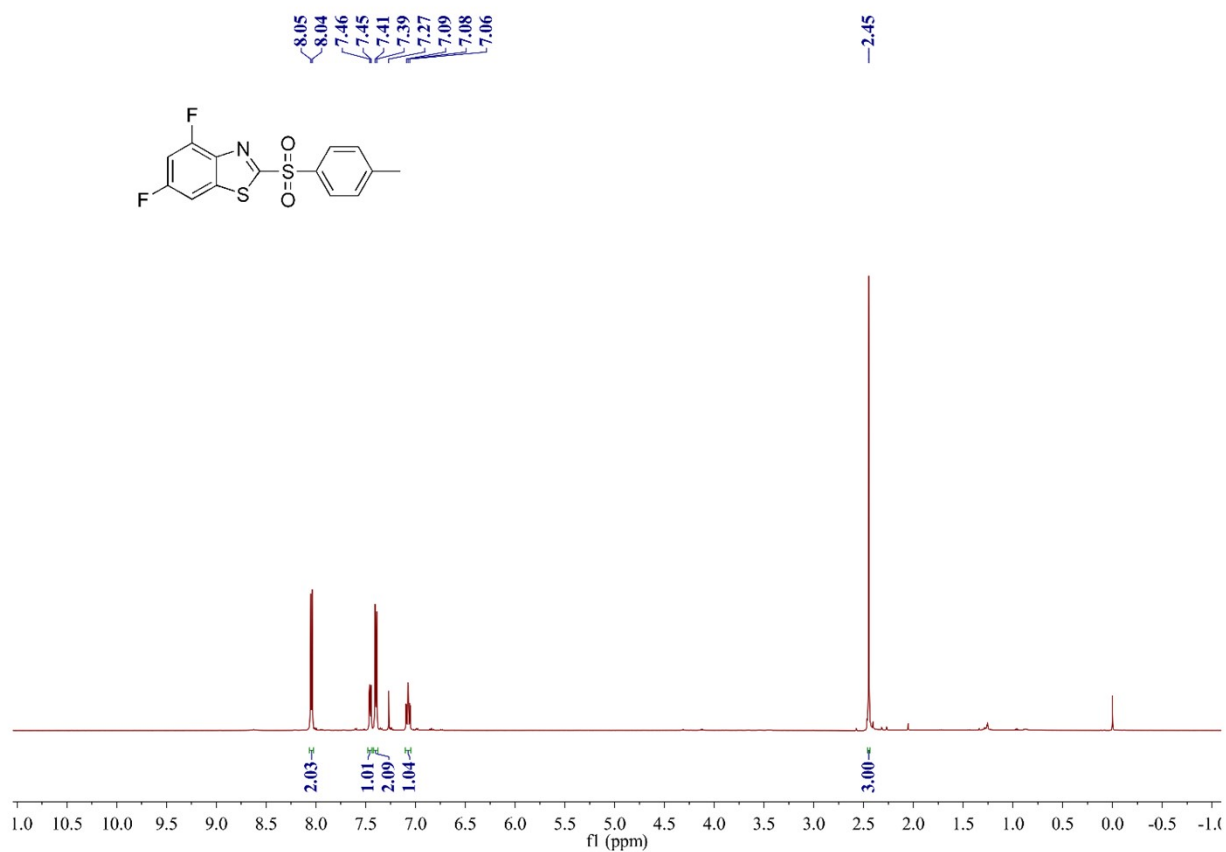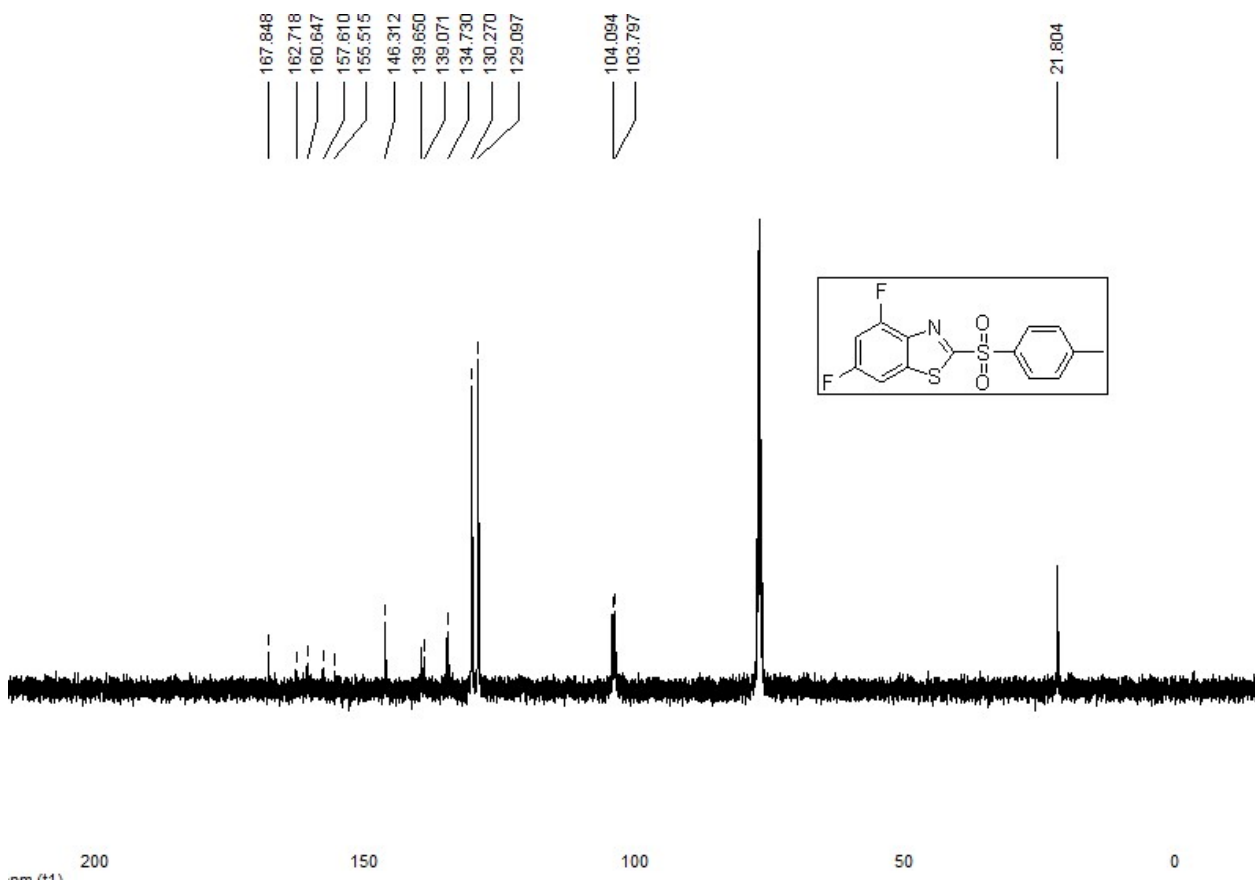

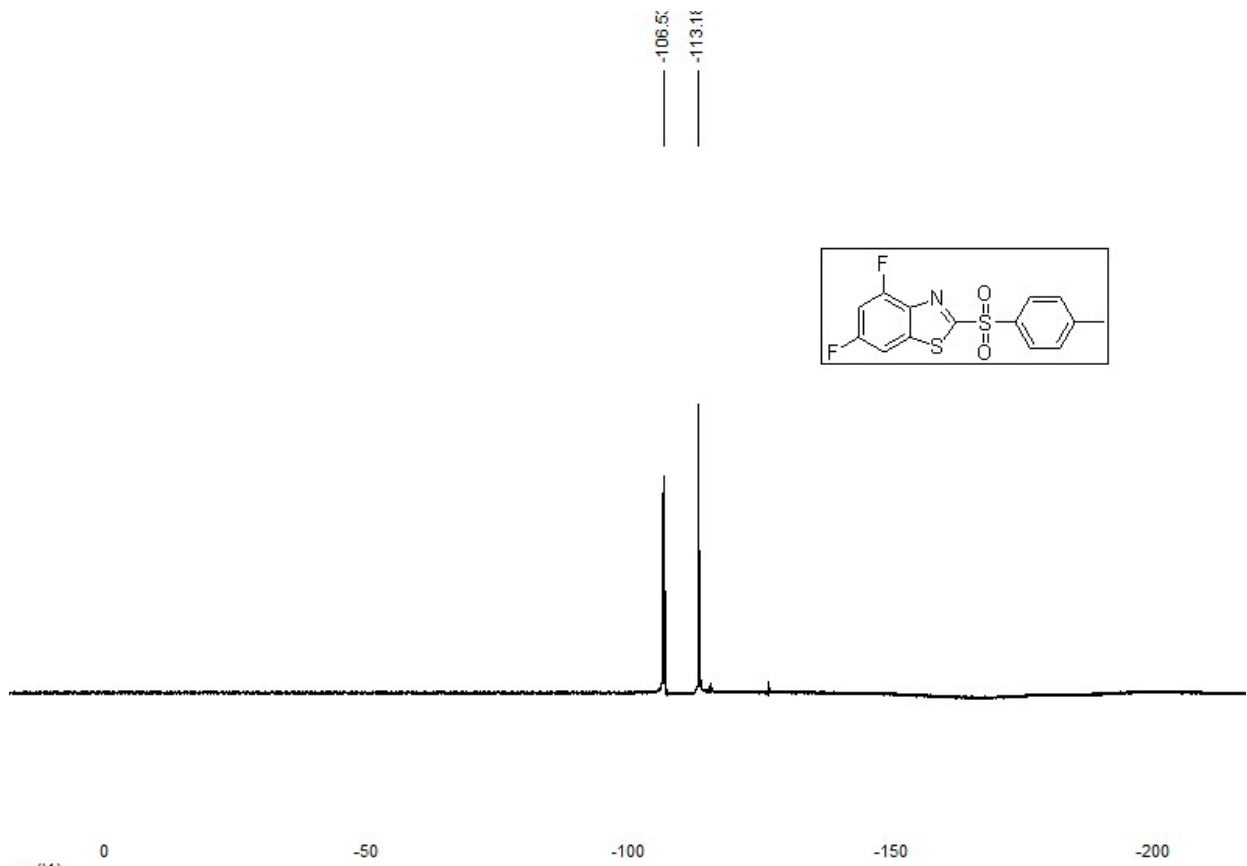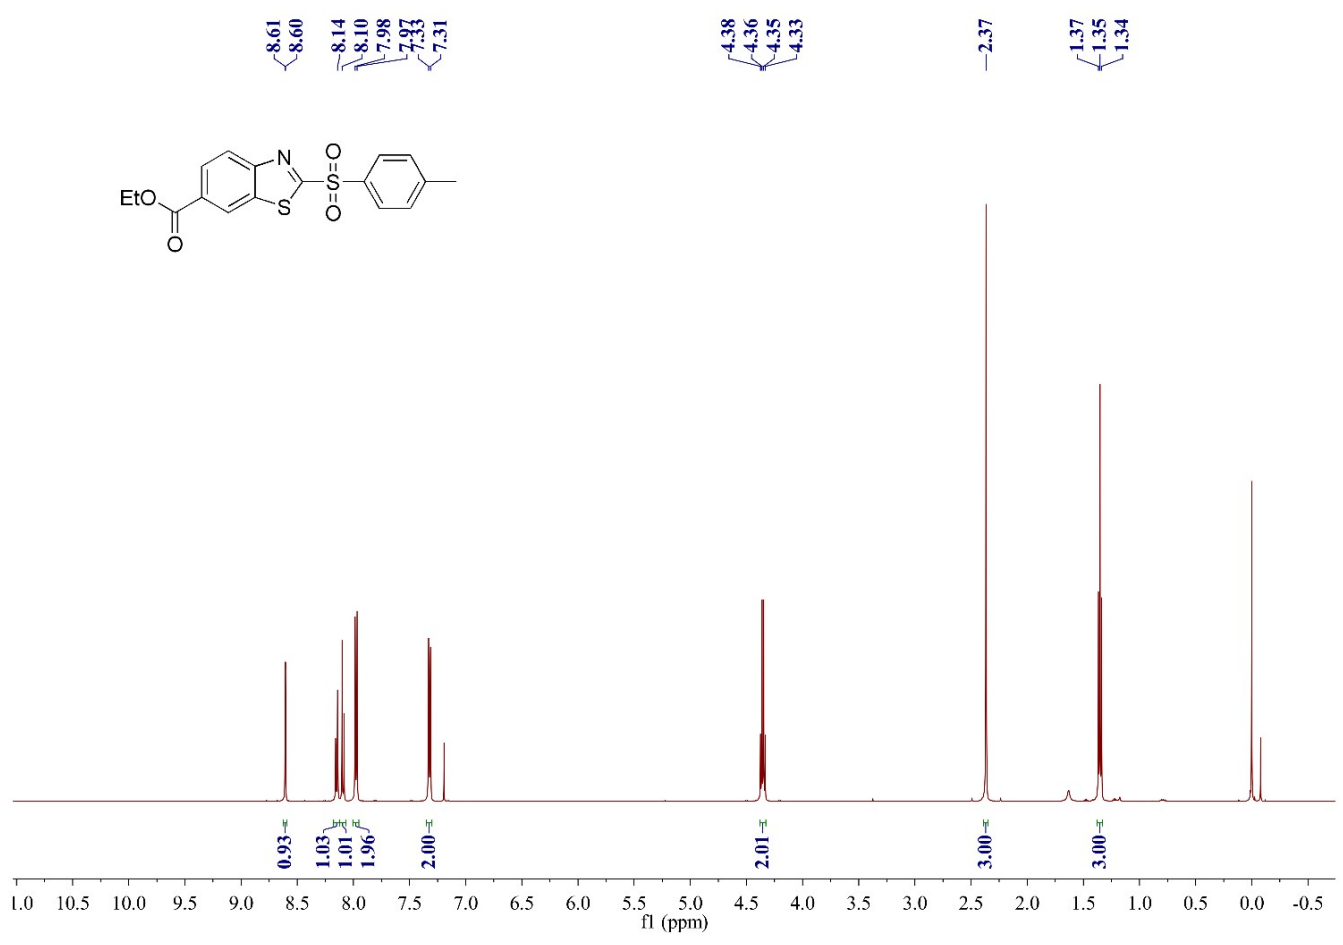

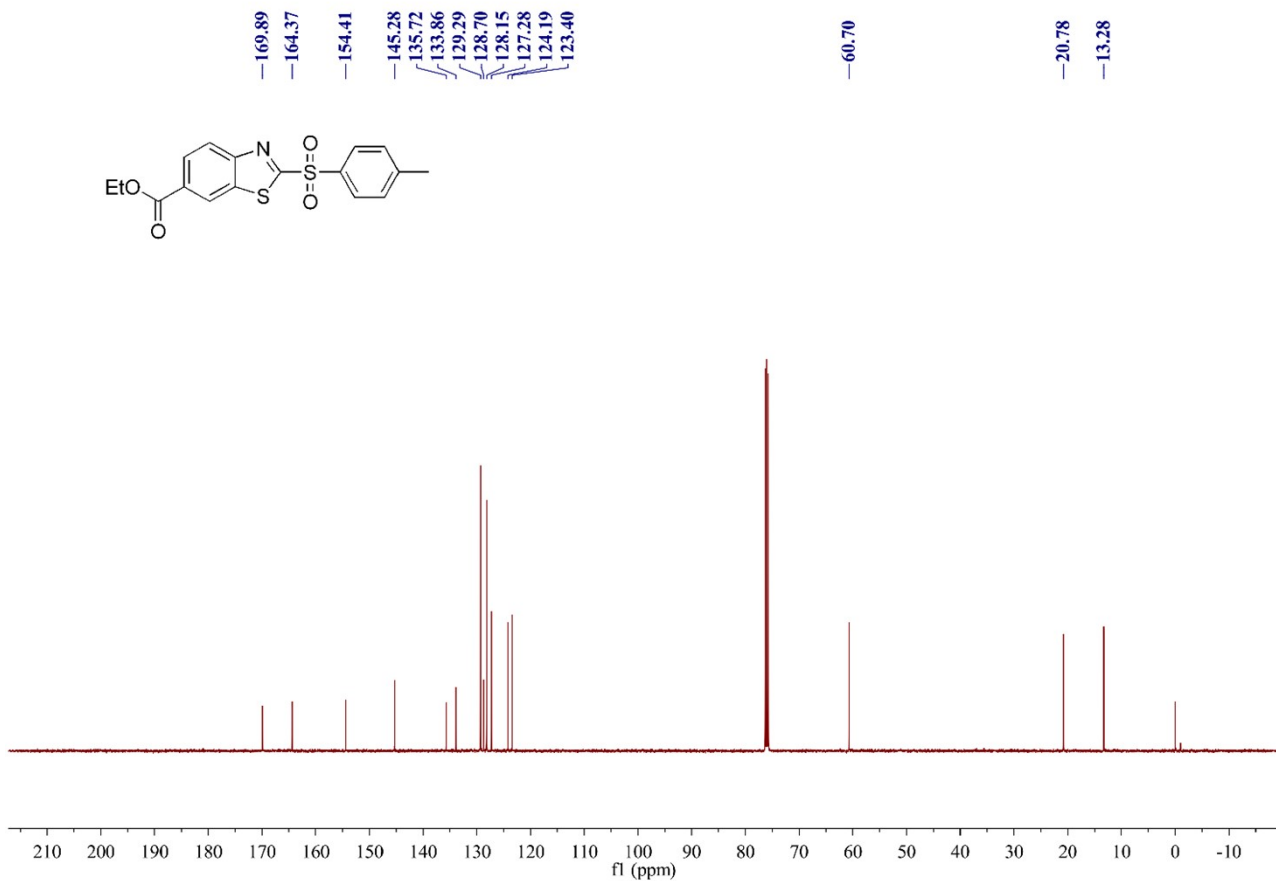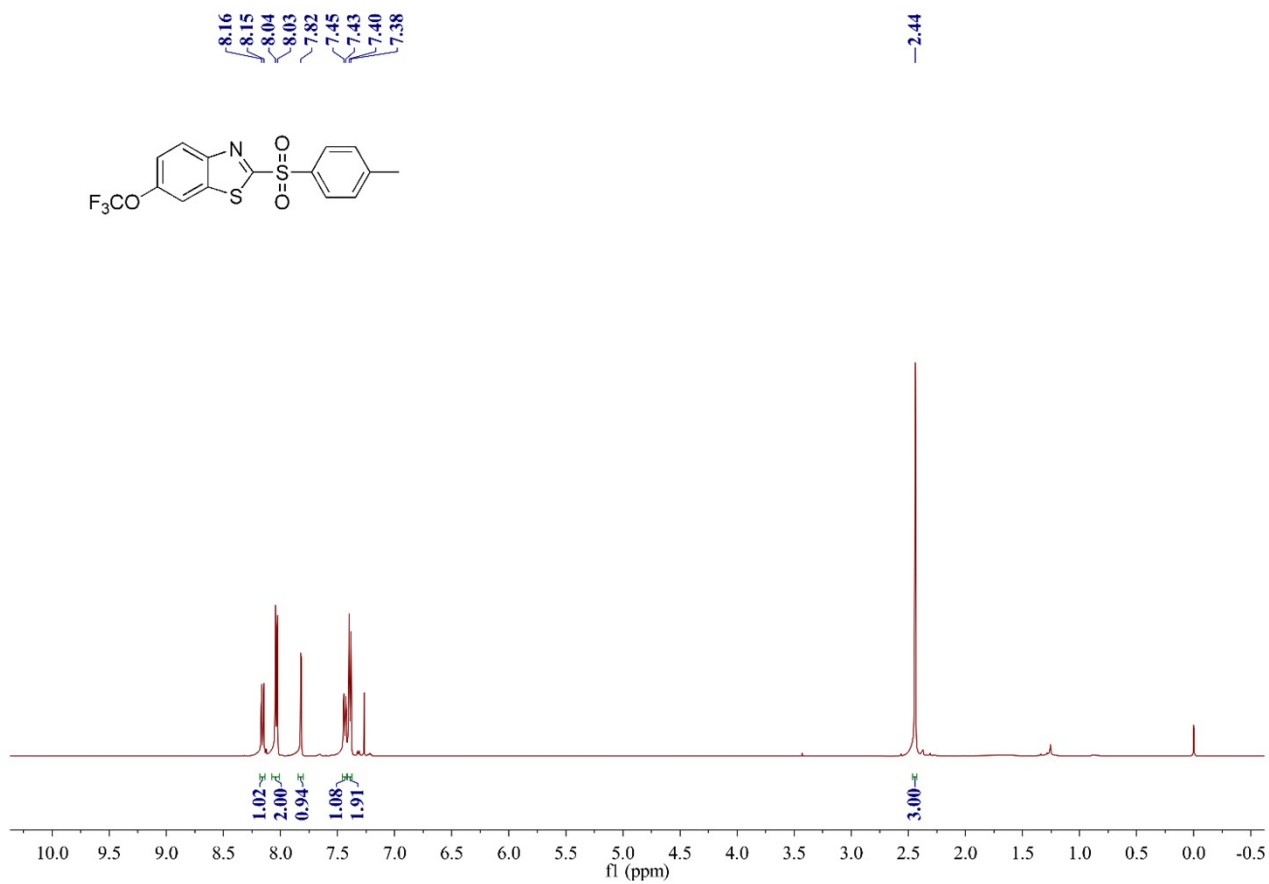

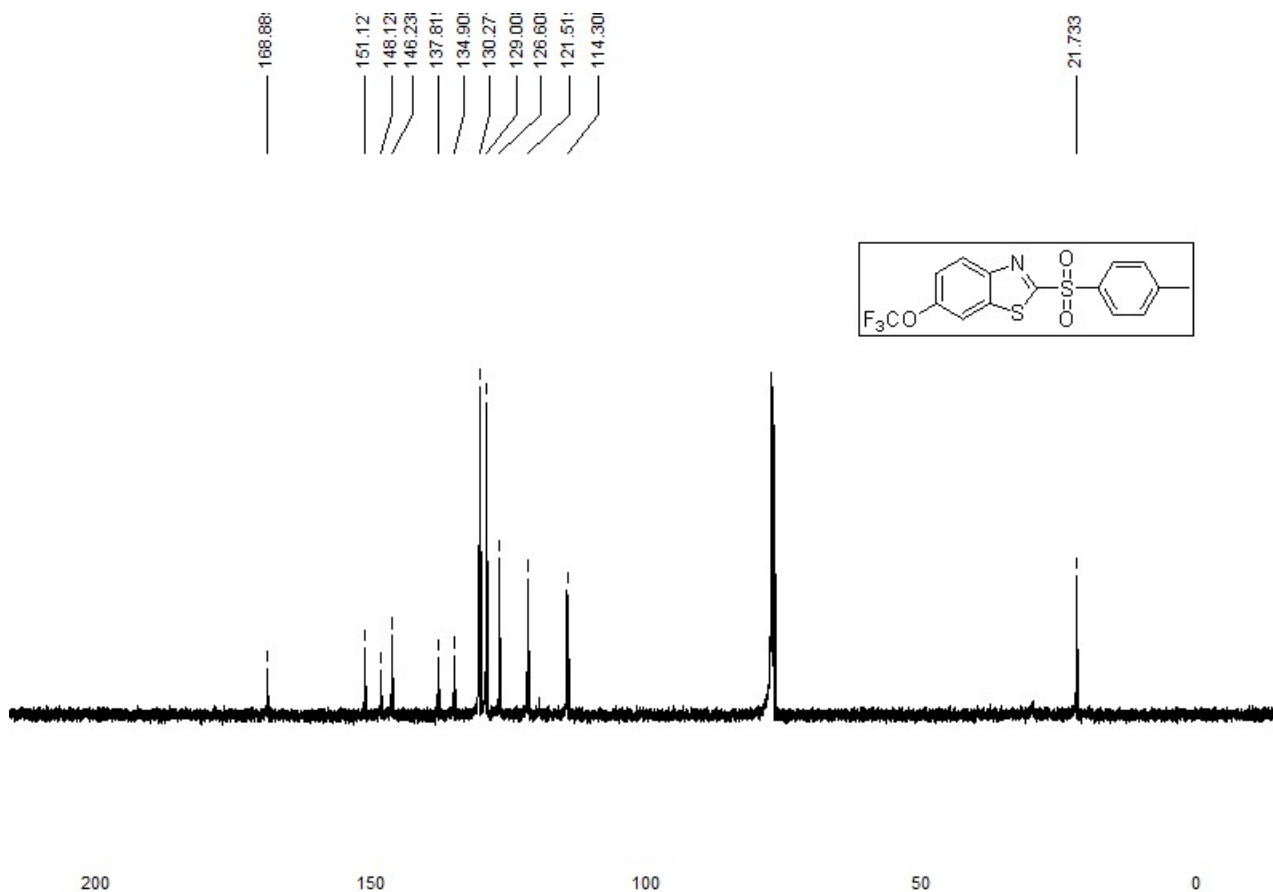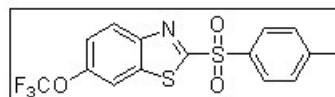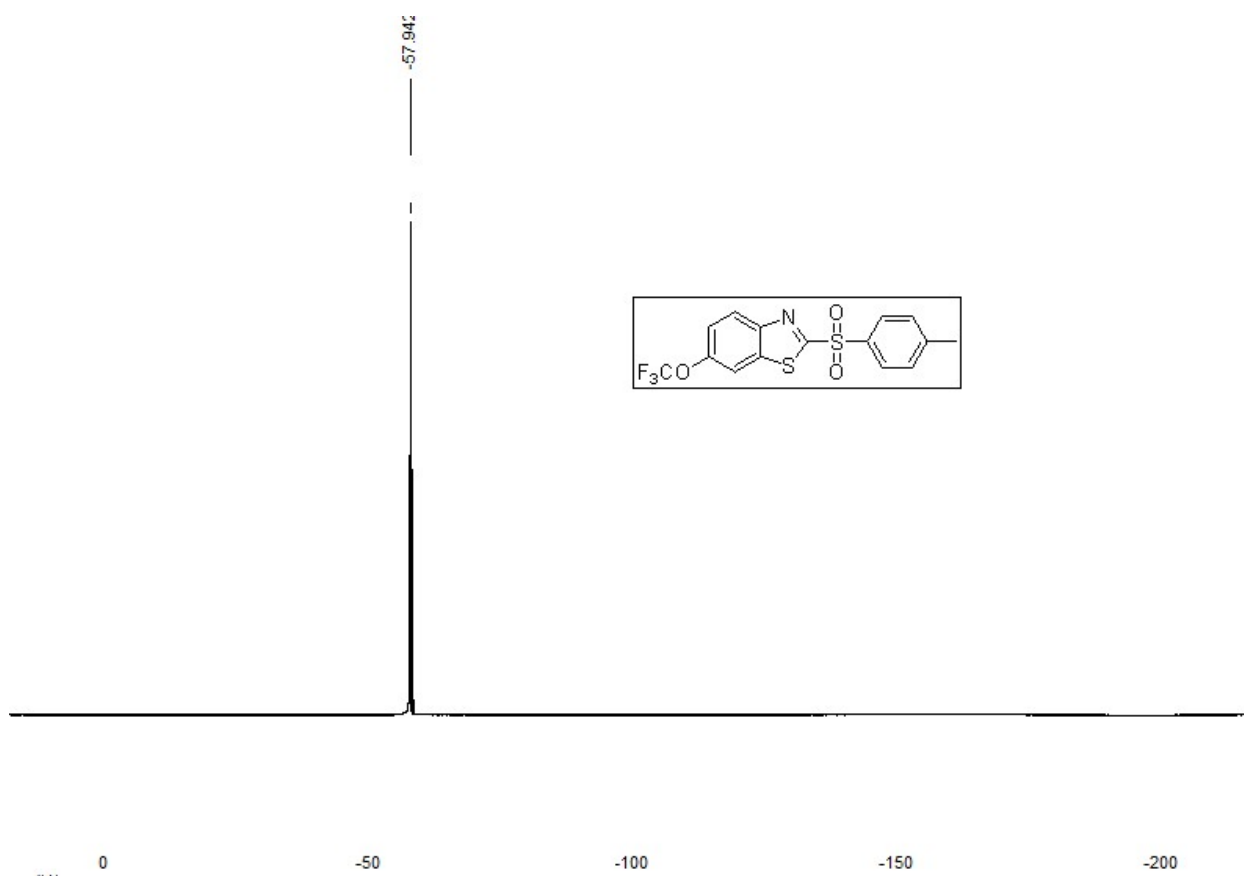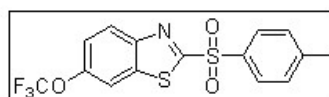

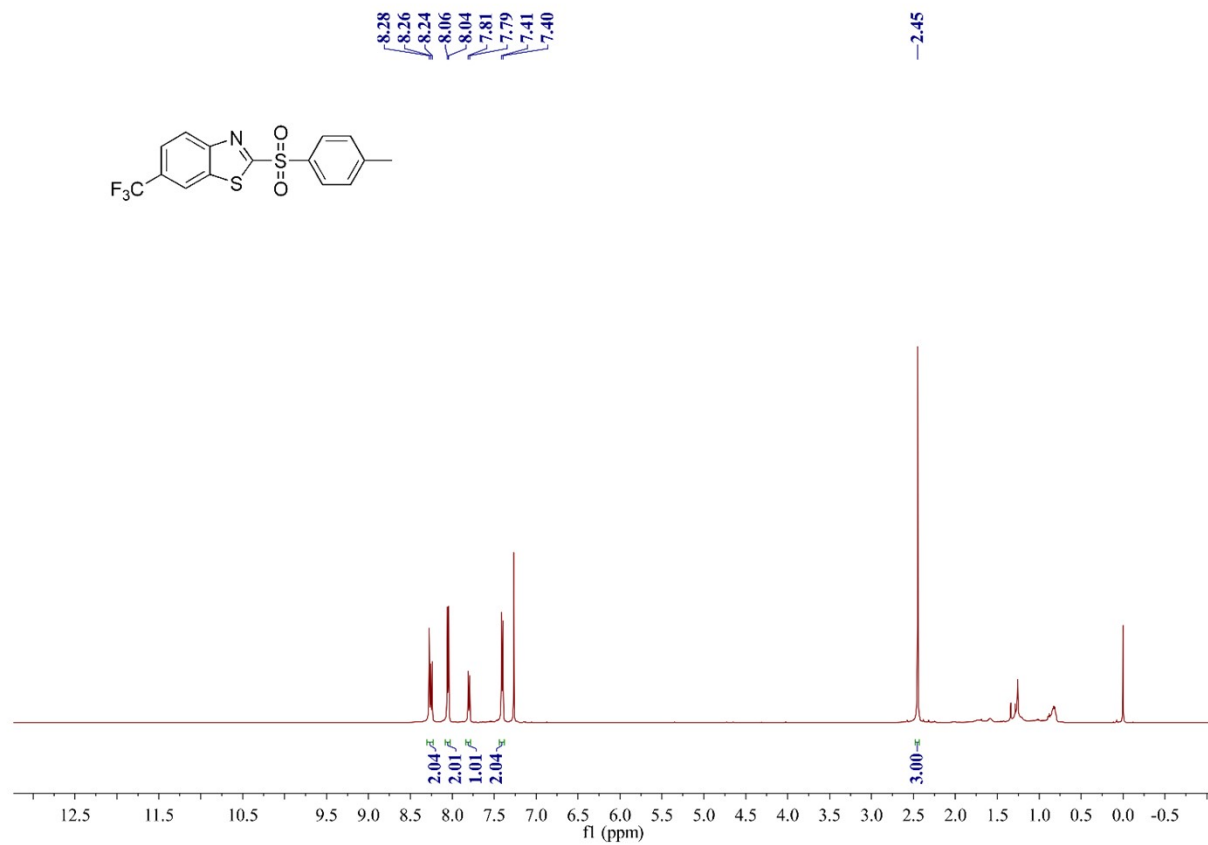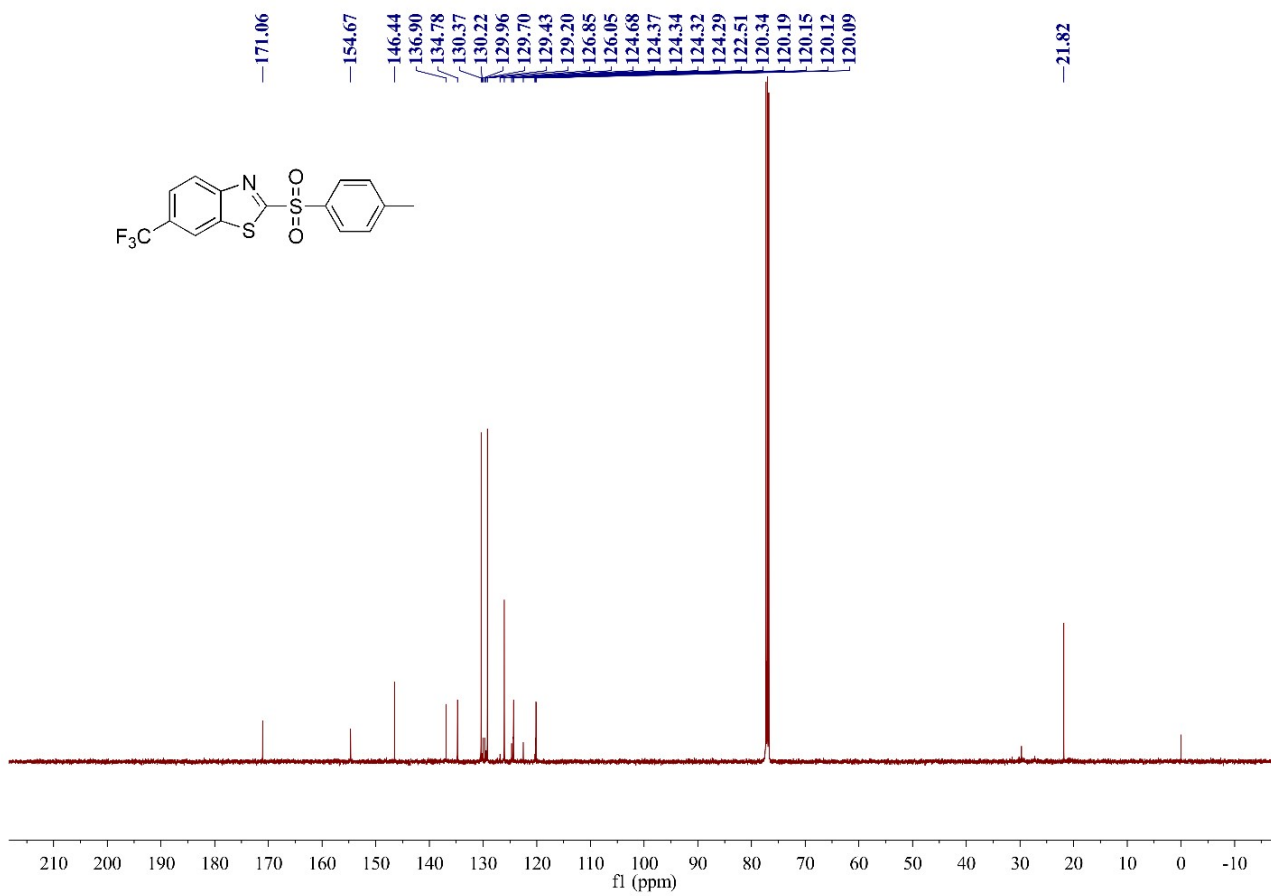

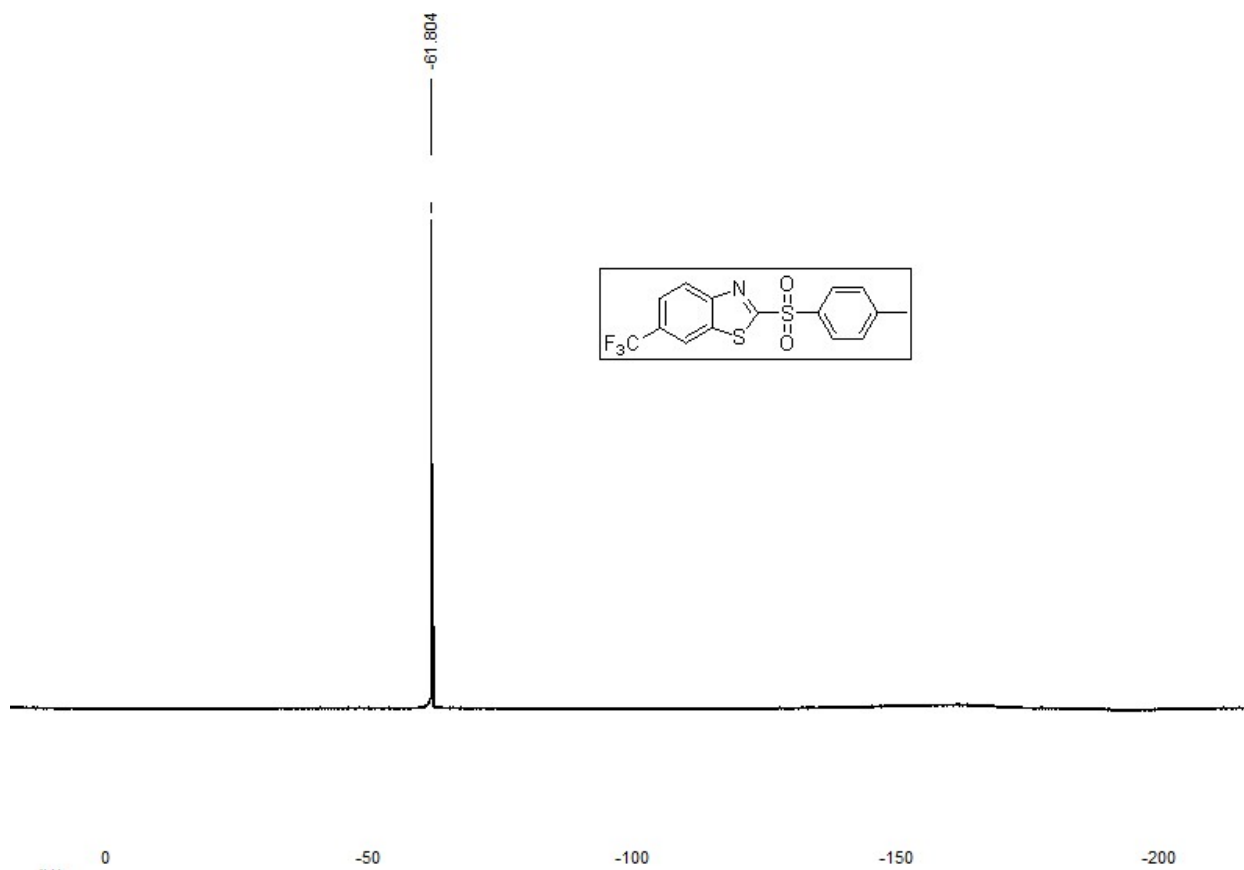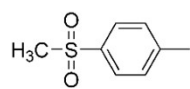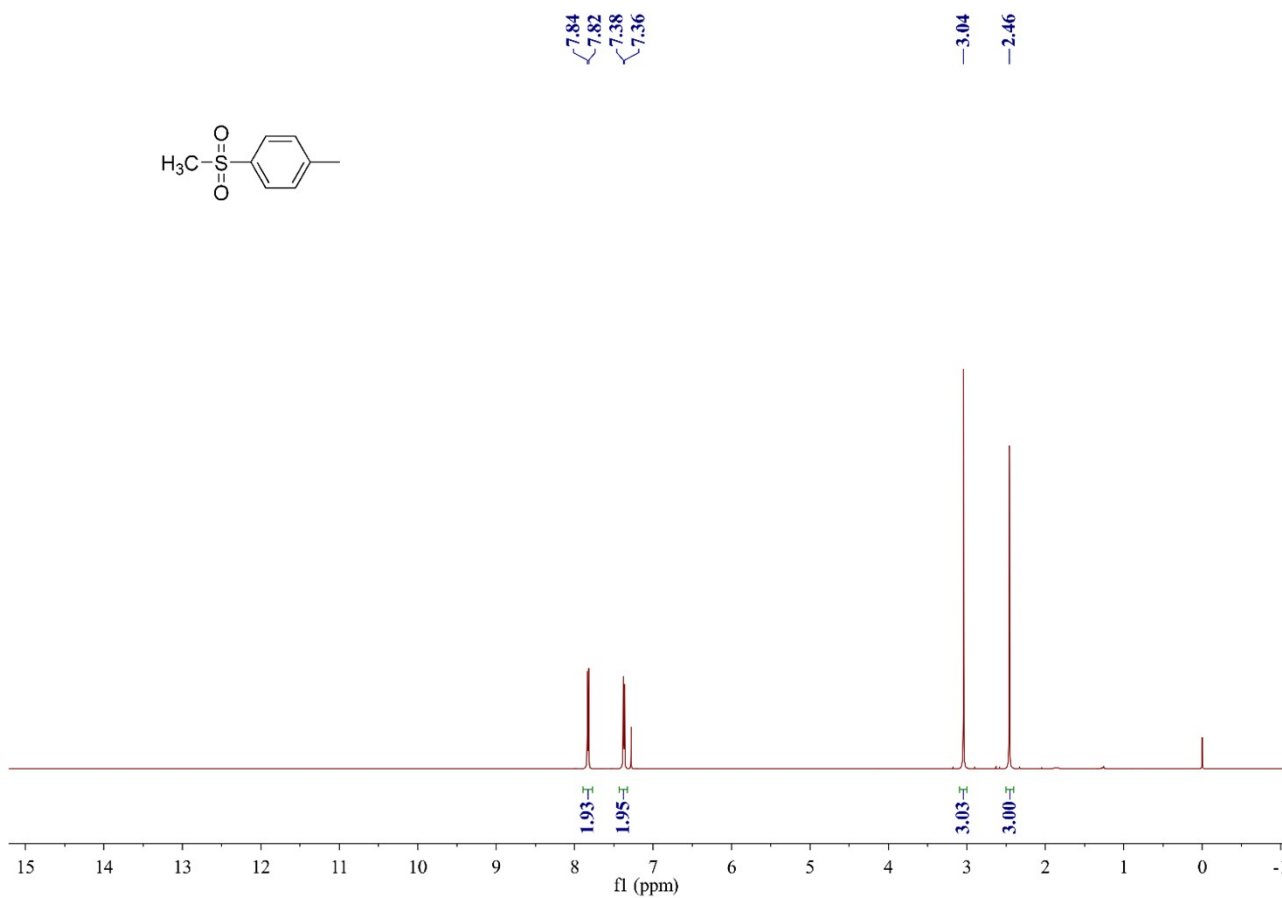

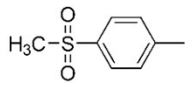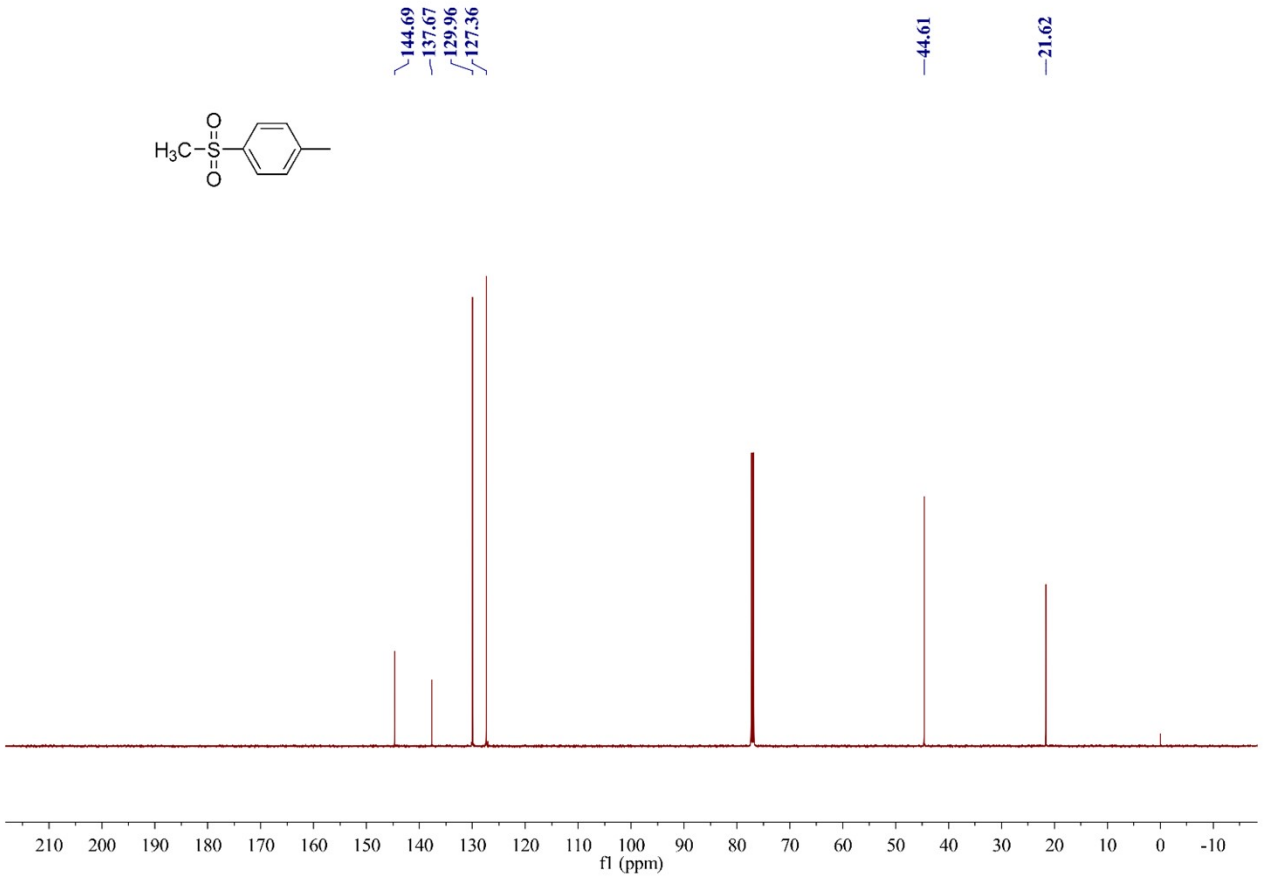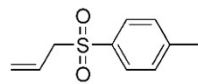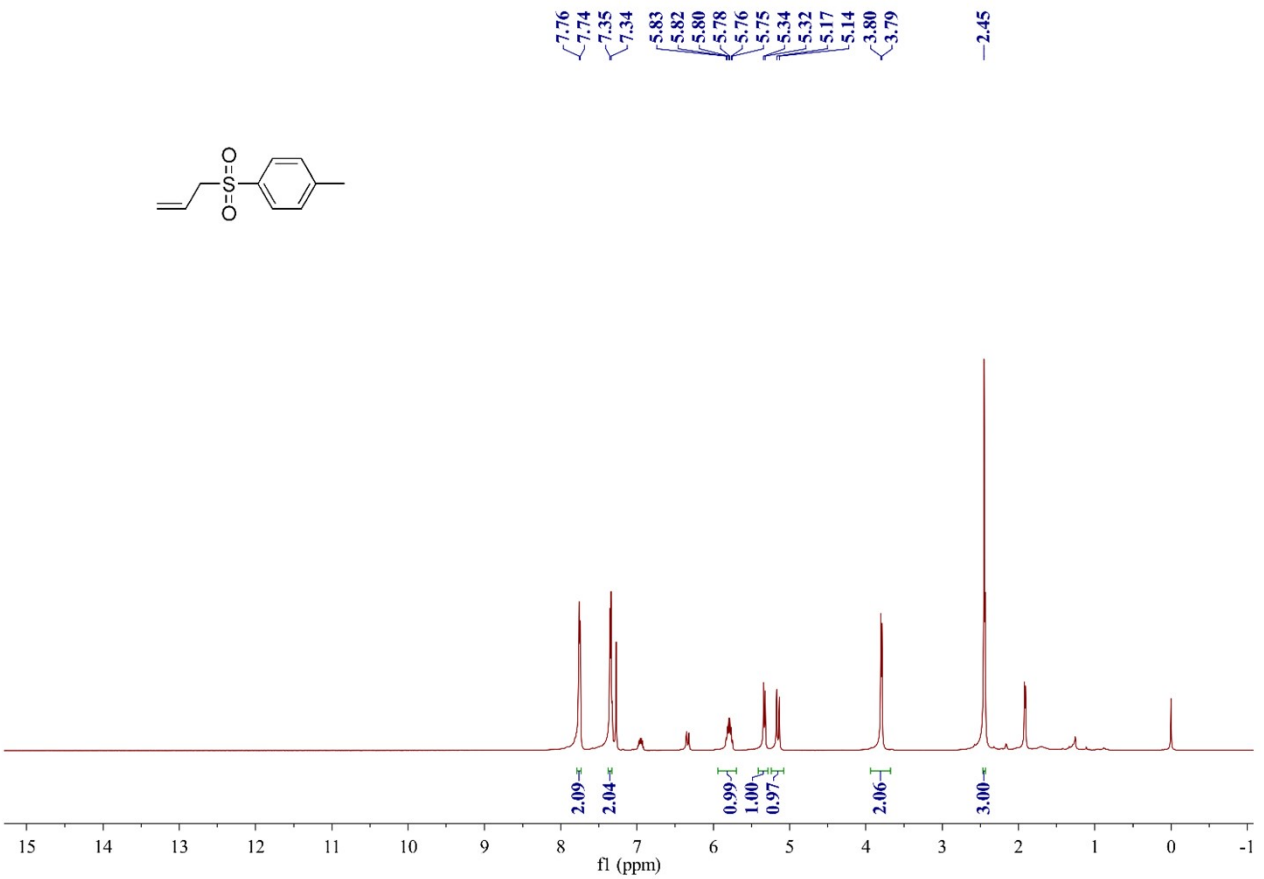

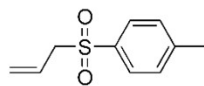

— 144.78  
✓ 135.19  
✓ 129.70  
✓ 128.45  
✓ 124.76  
✓ 124.62

— 60.88

— 21.63

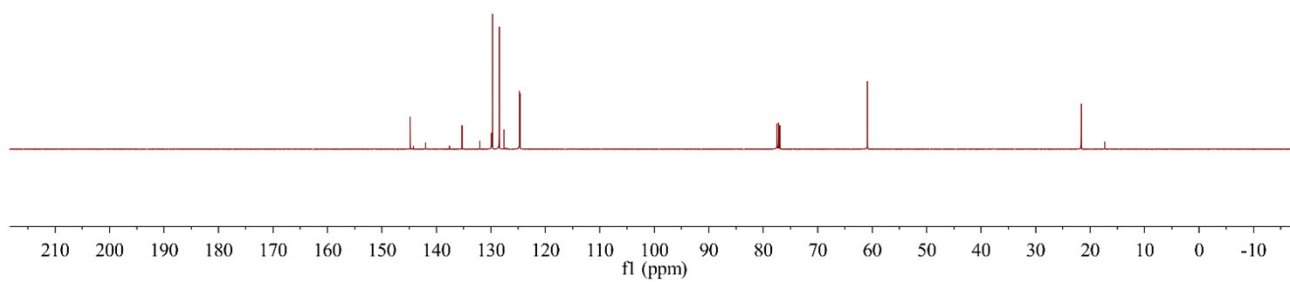



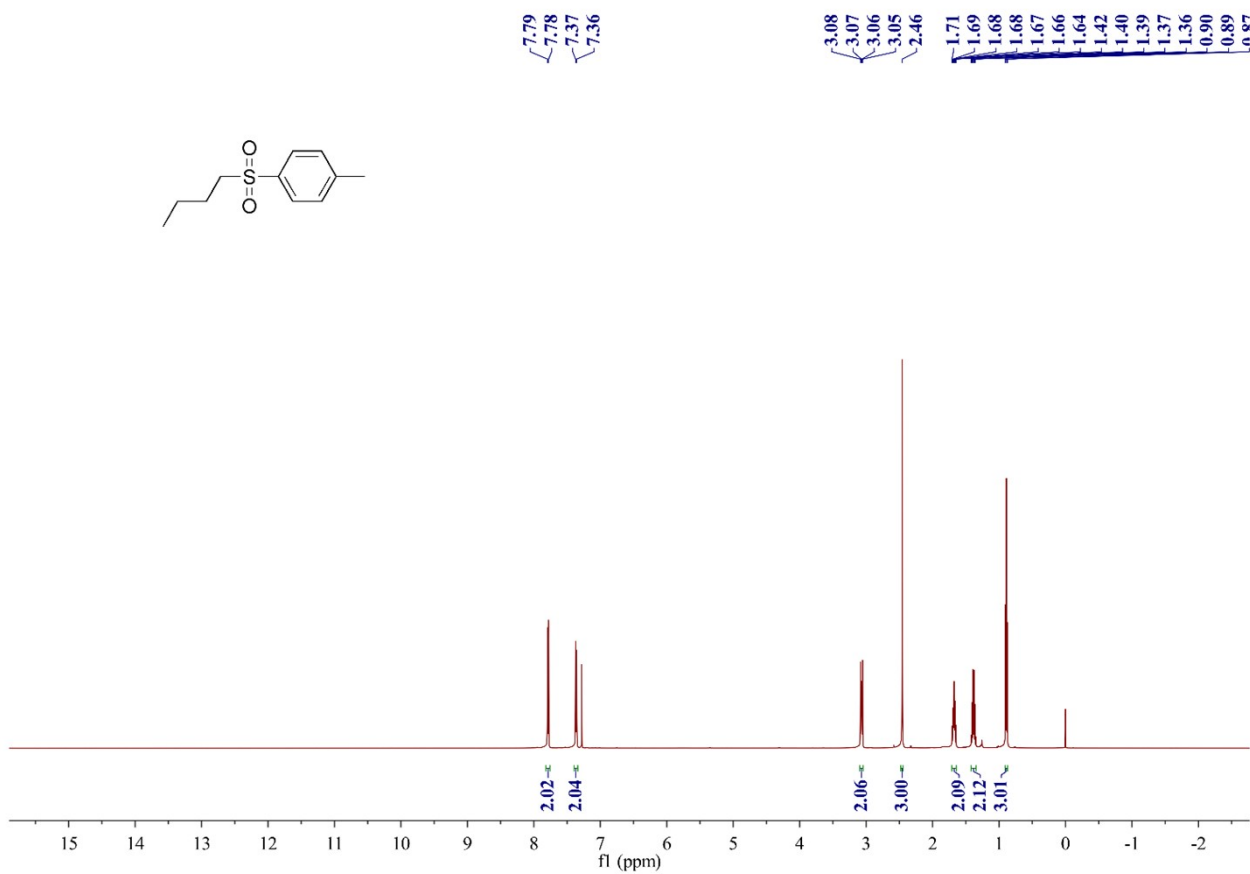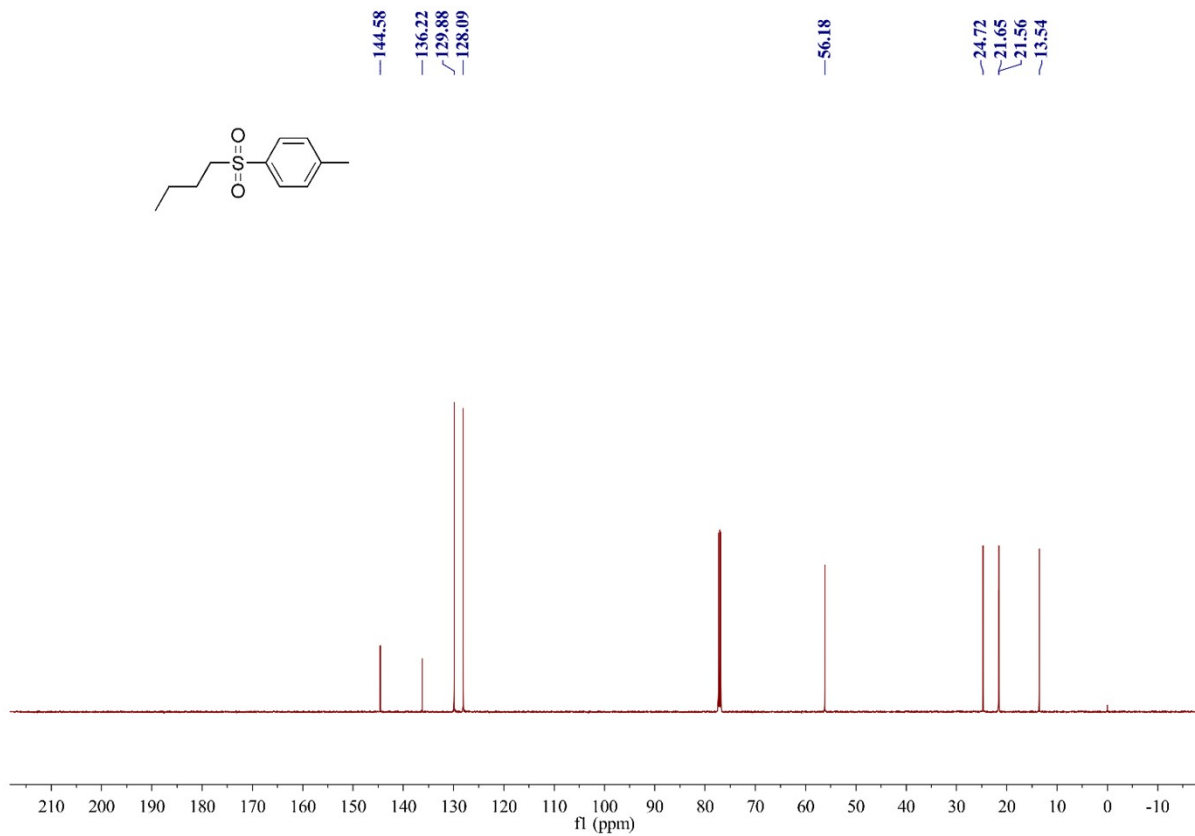

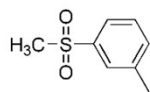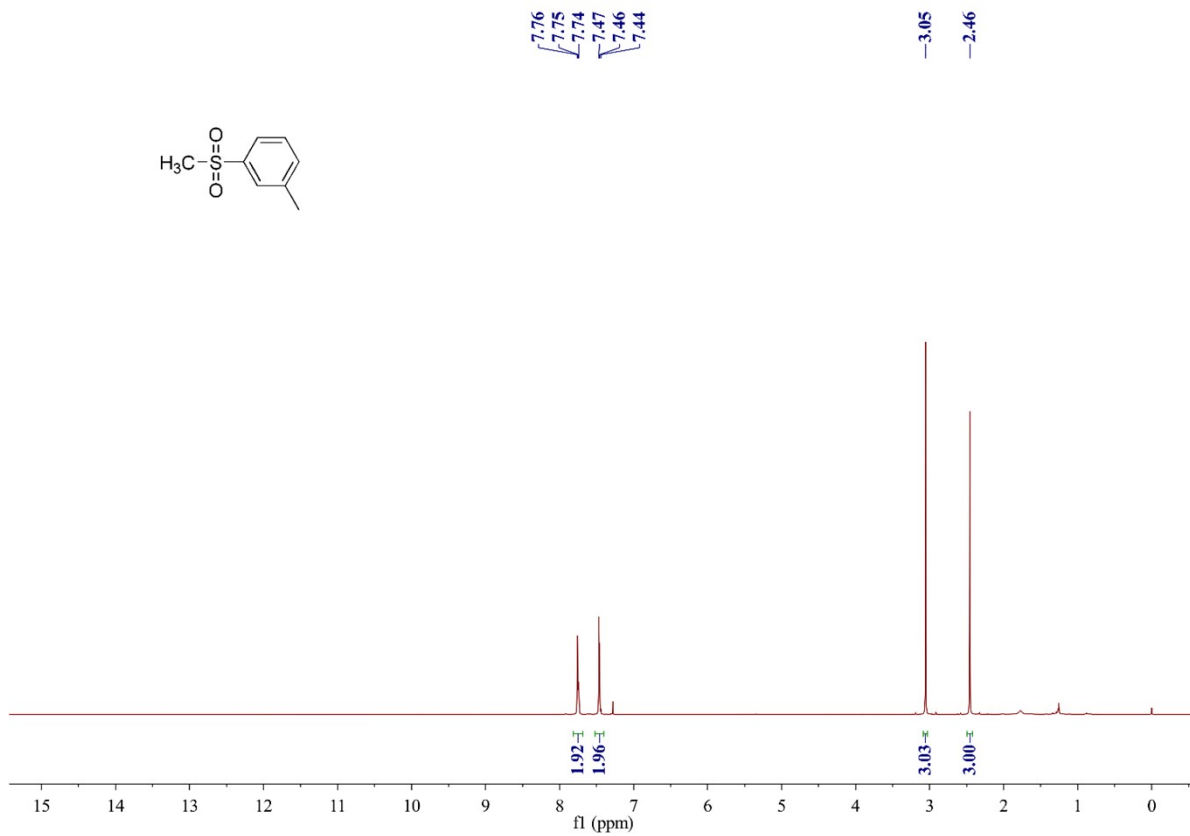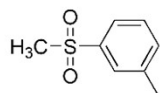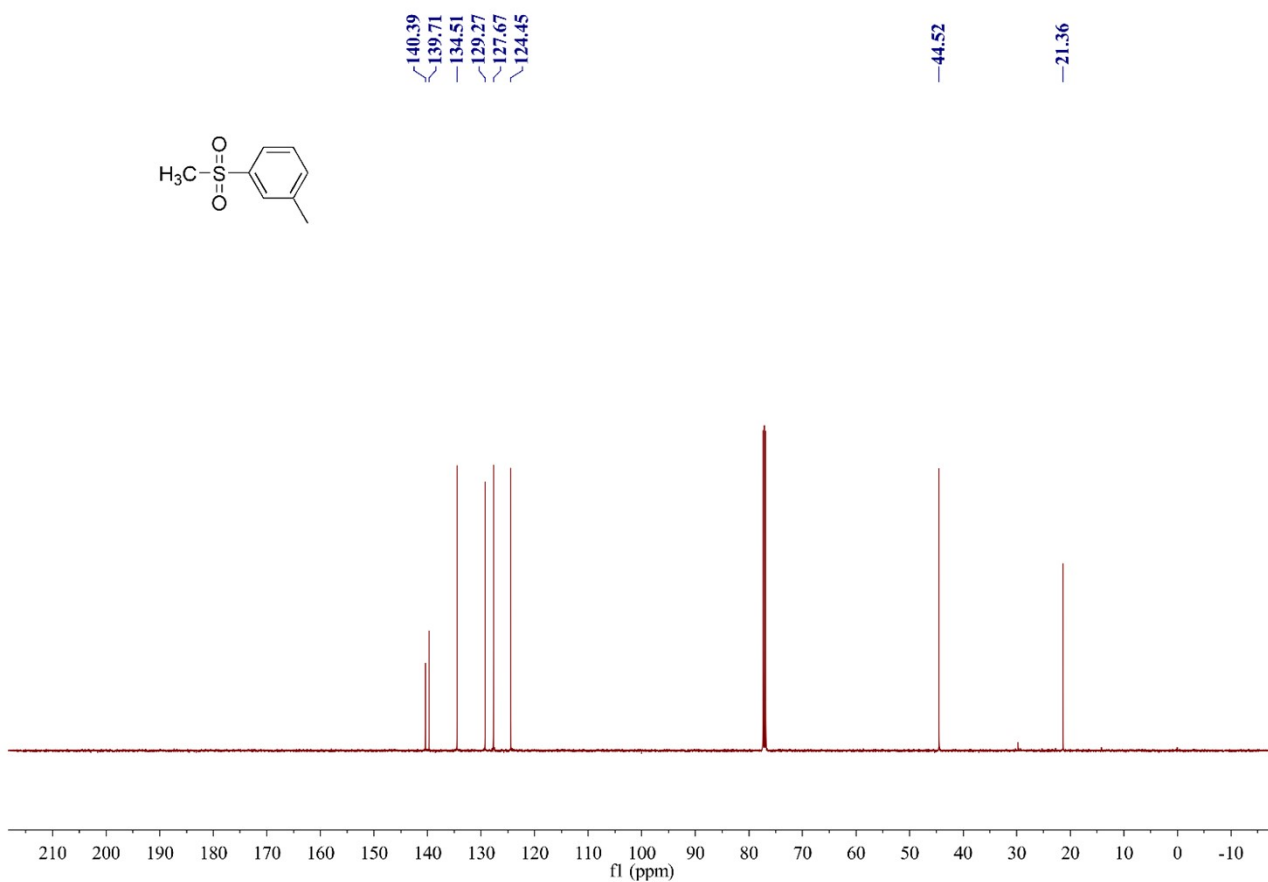

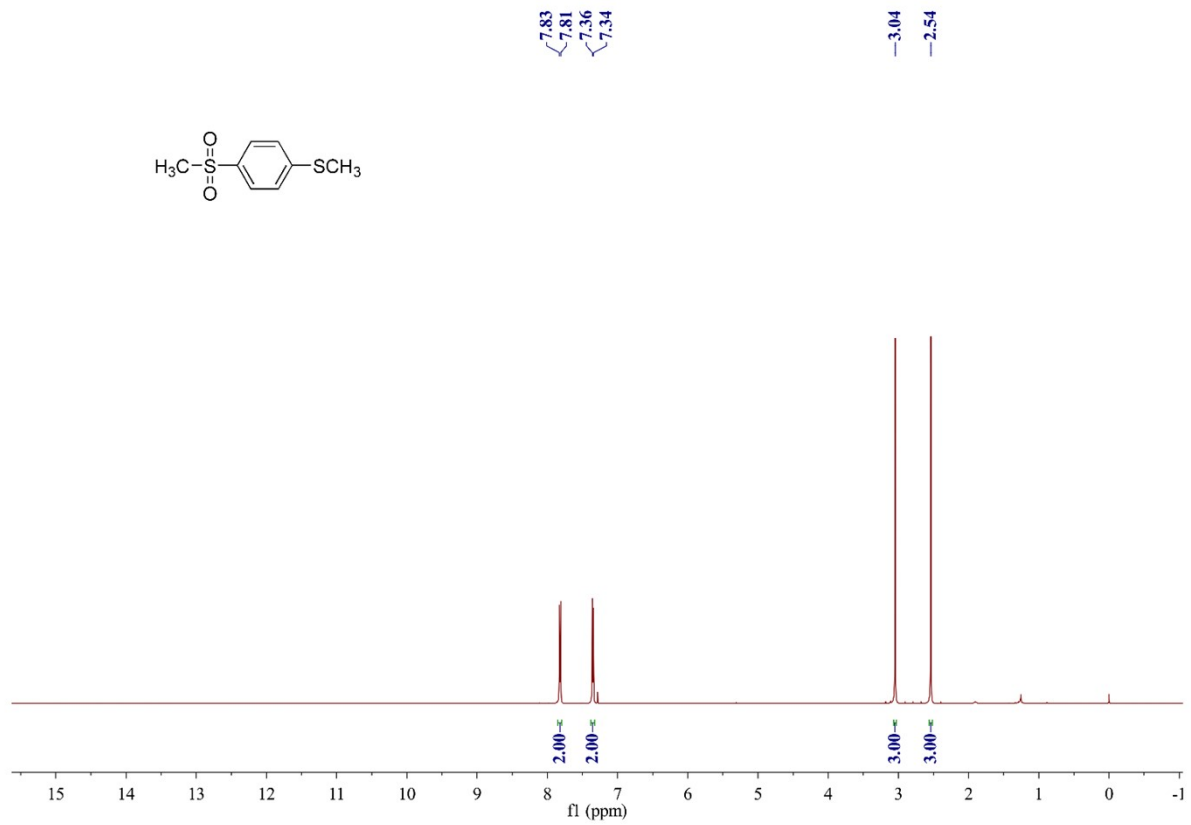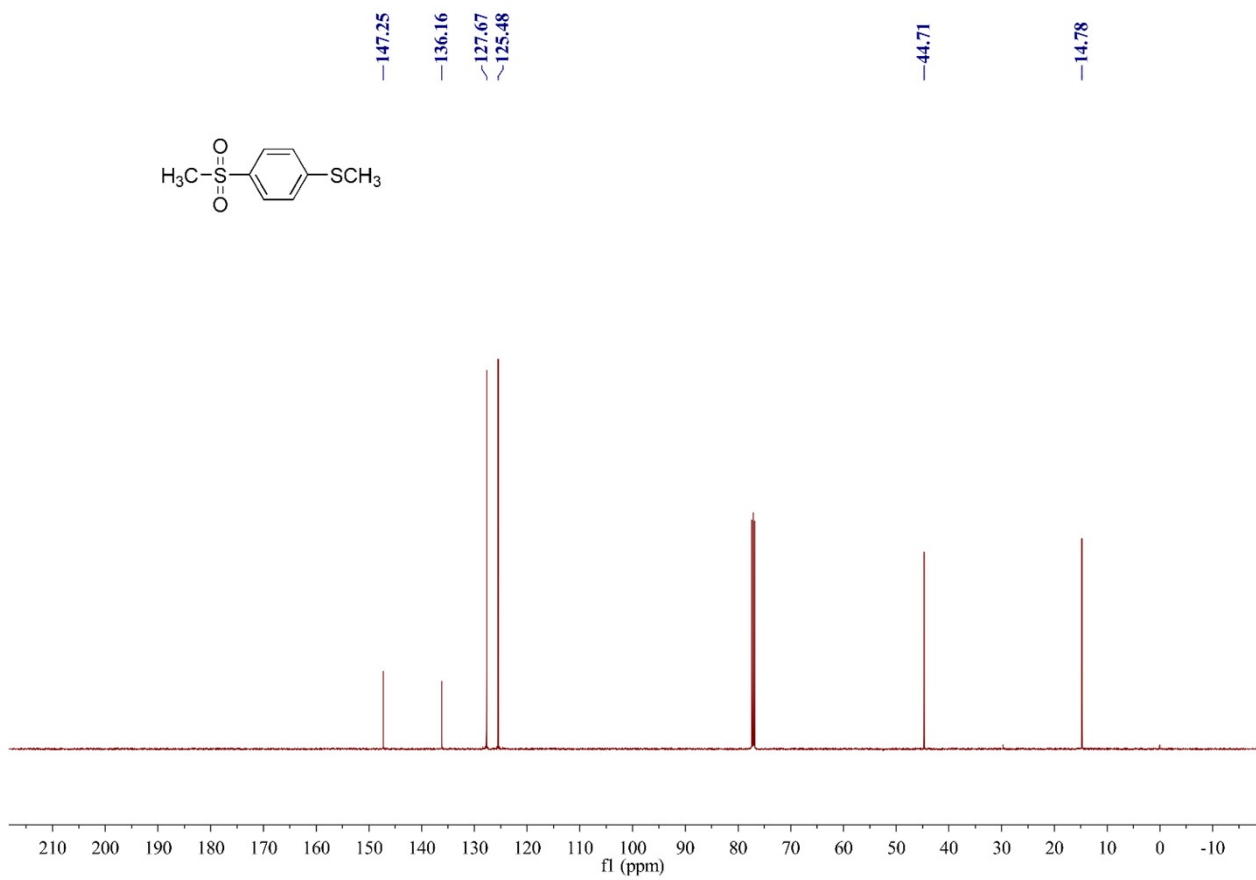

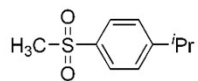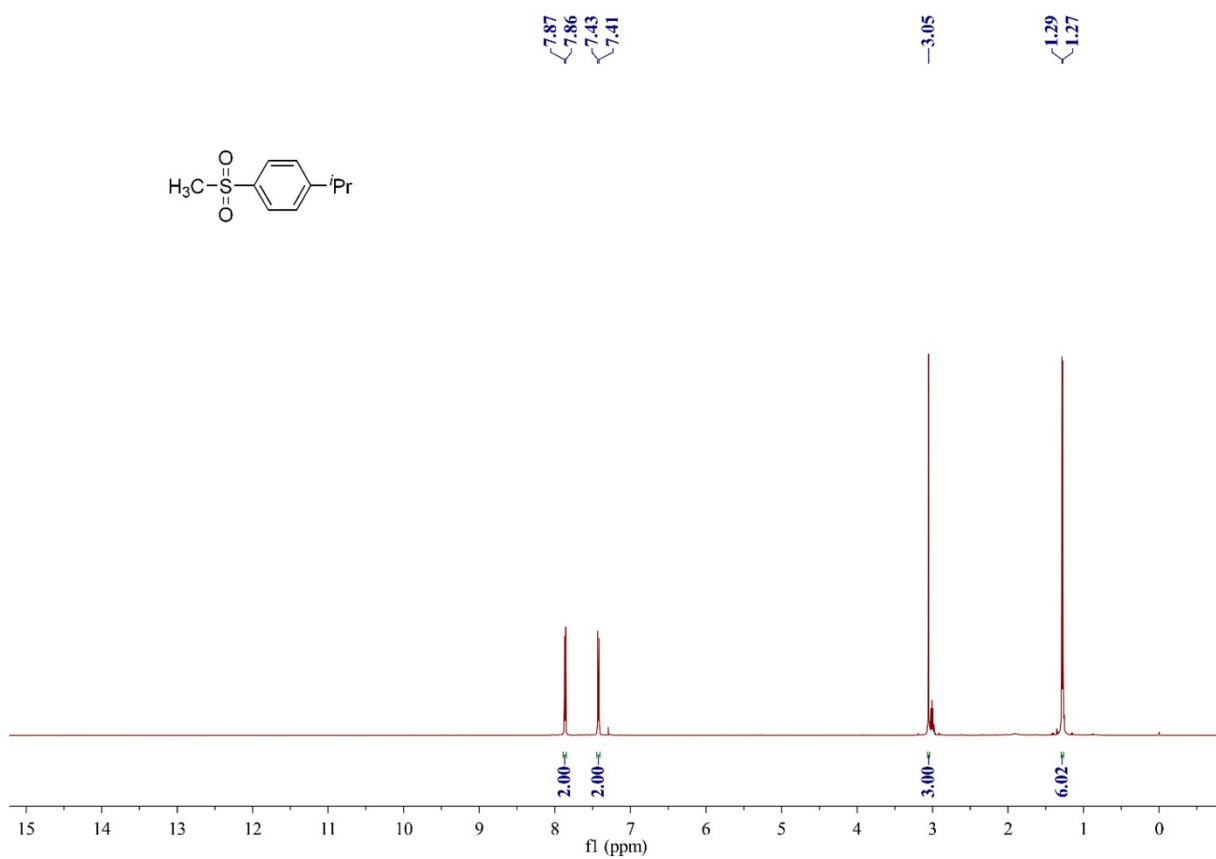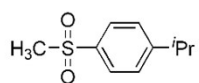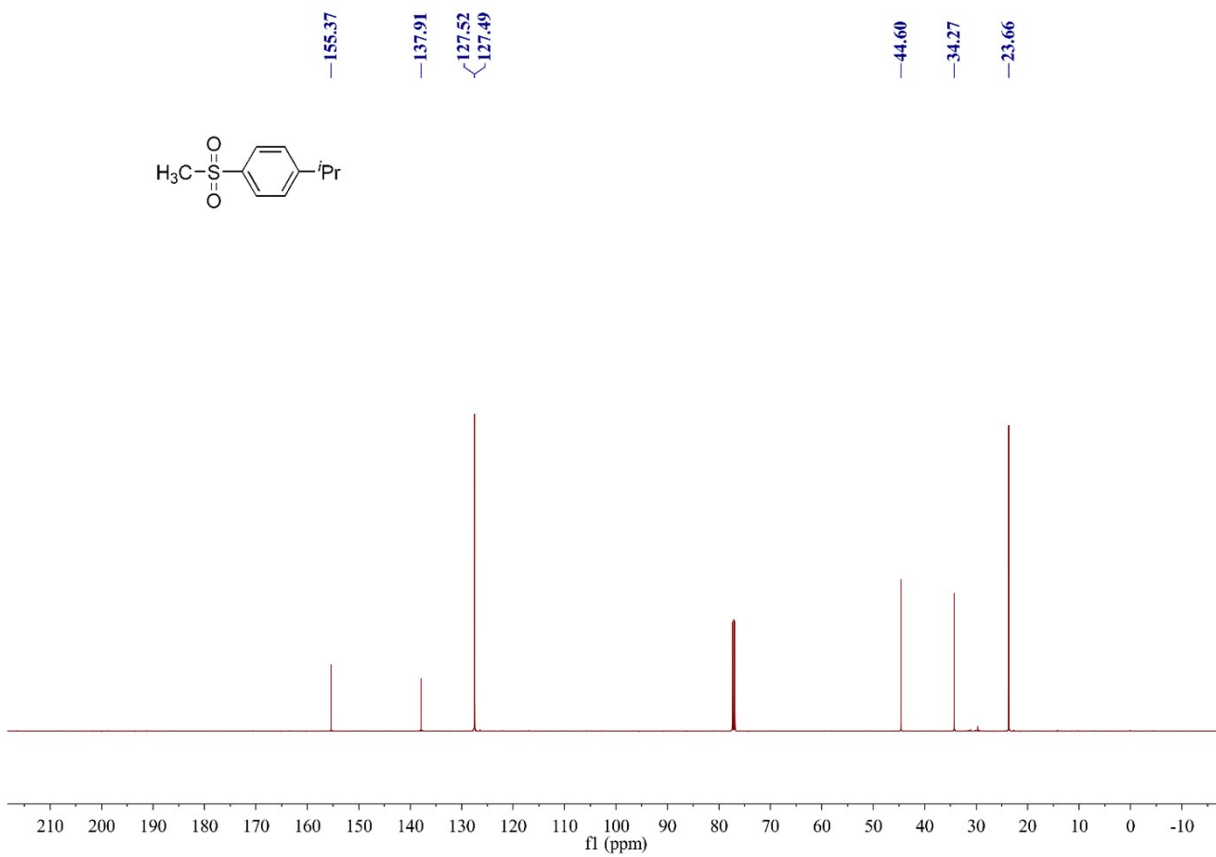

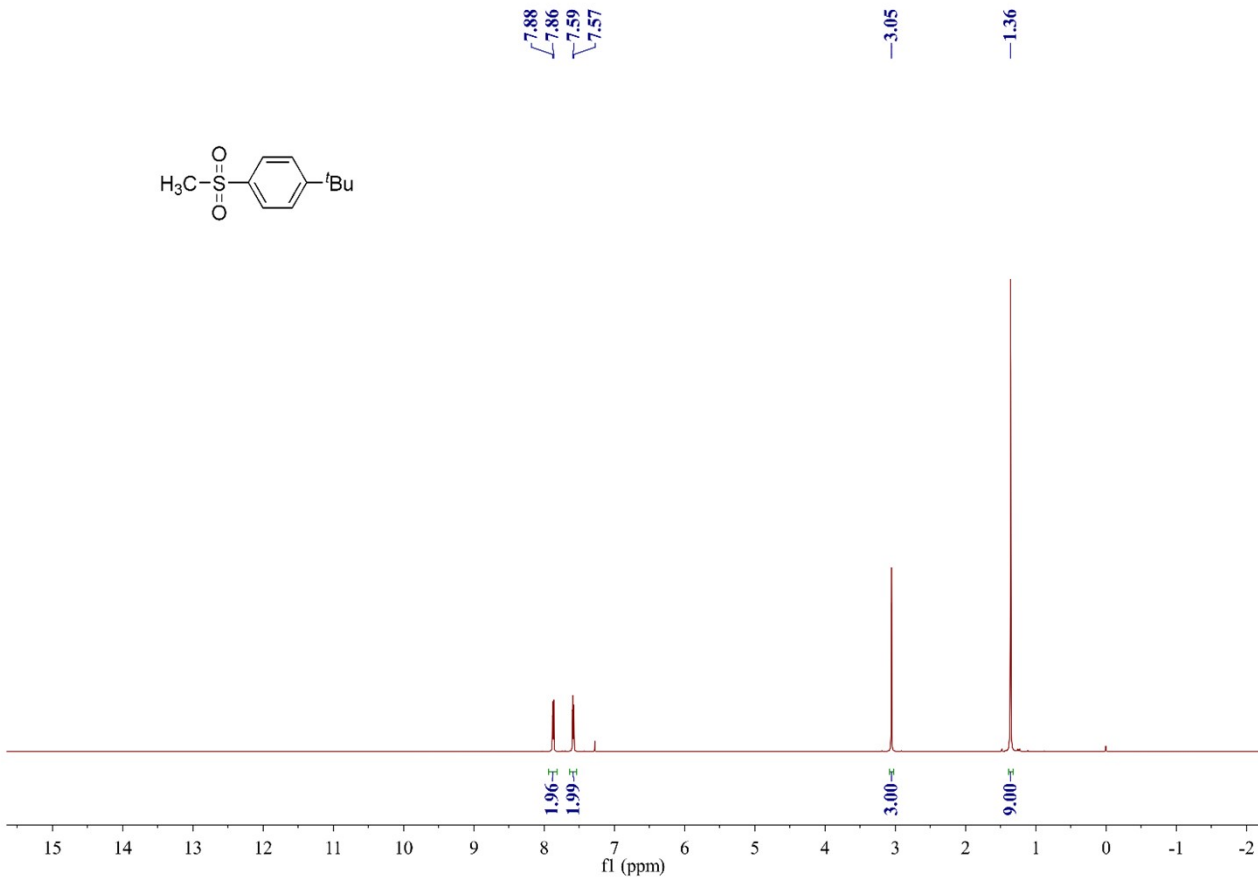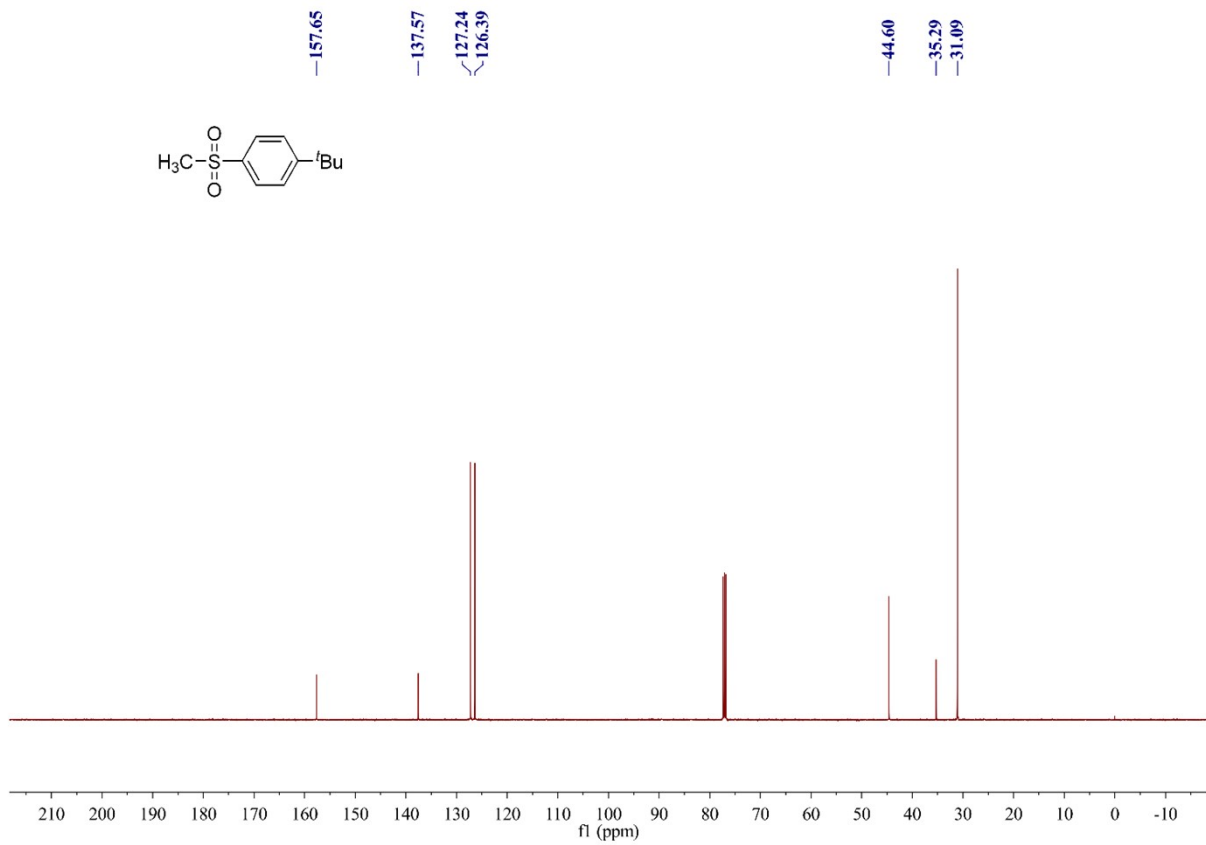

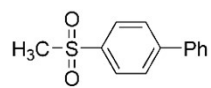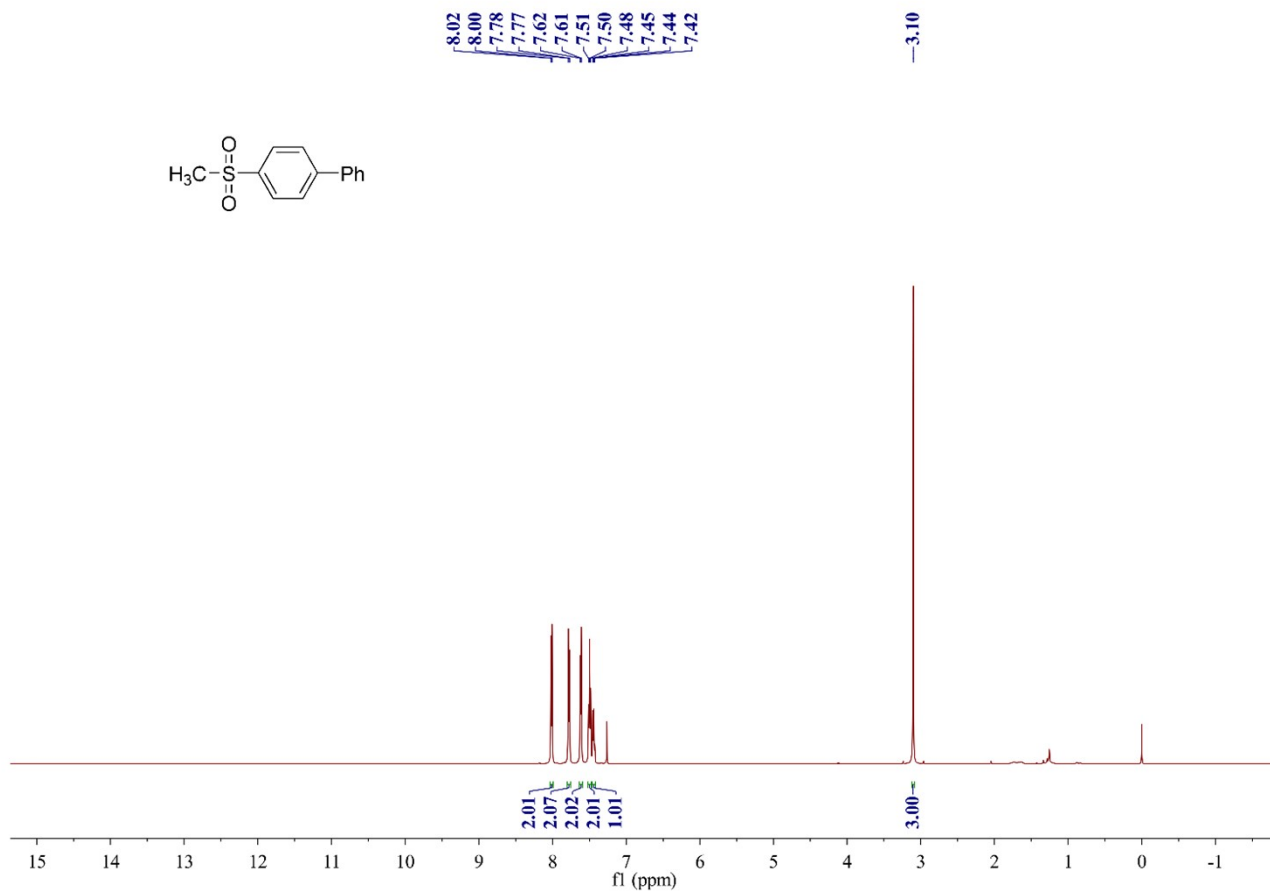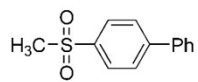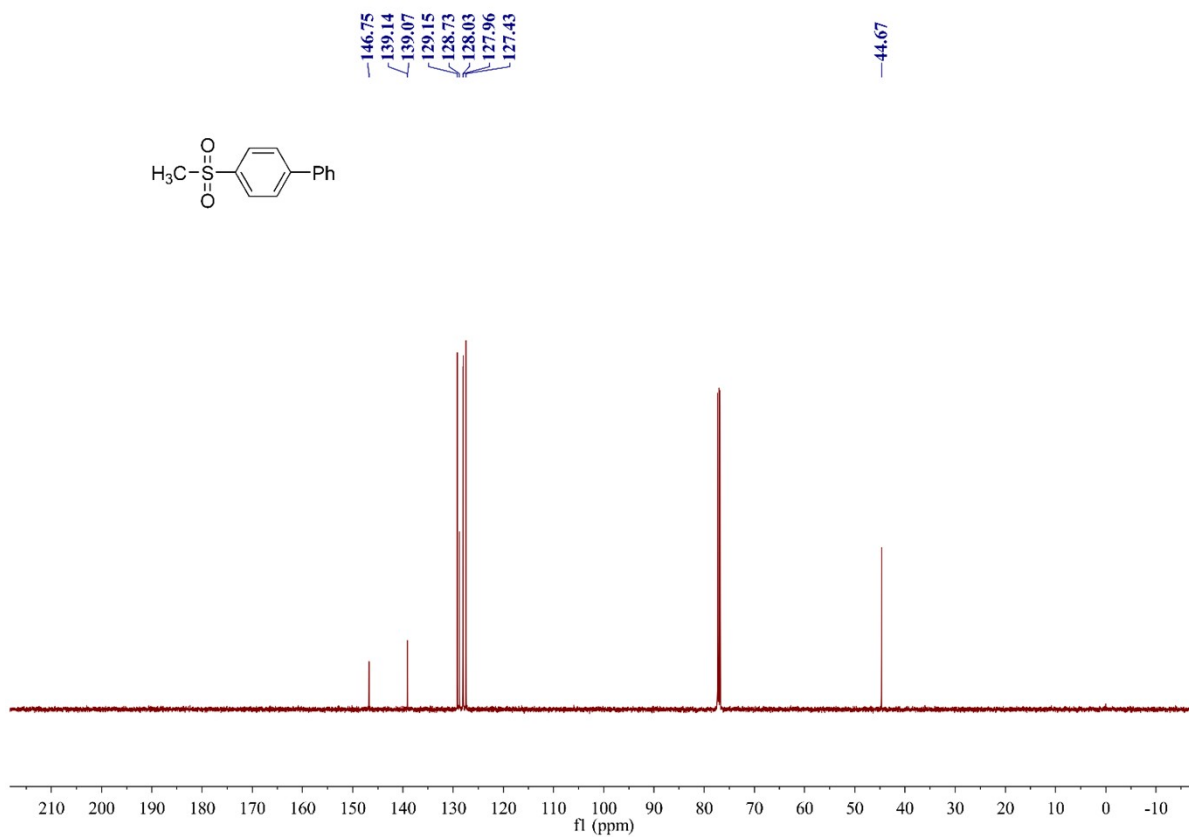

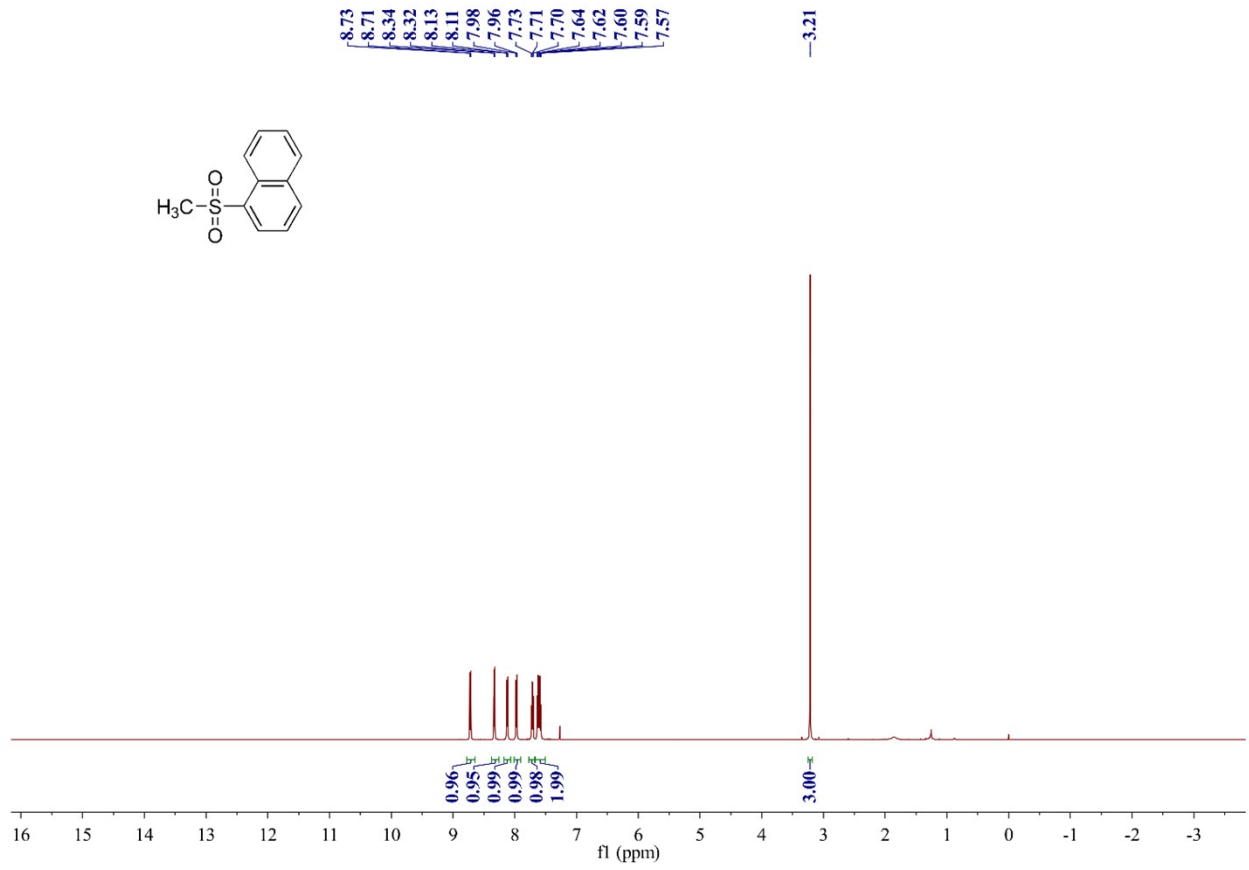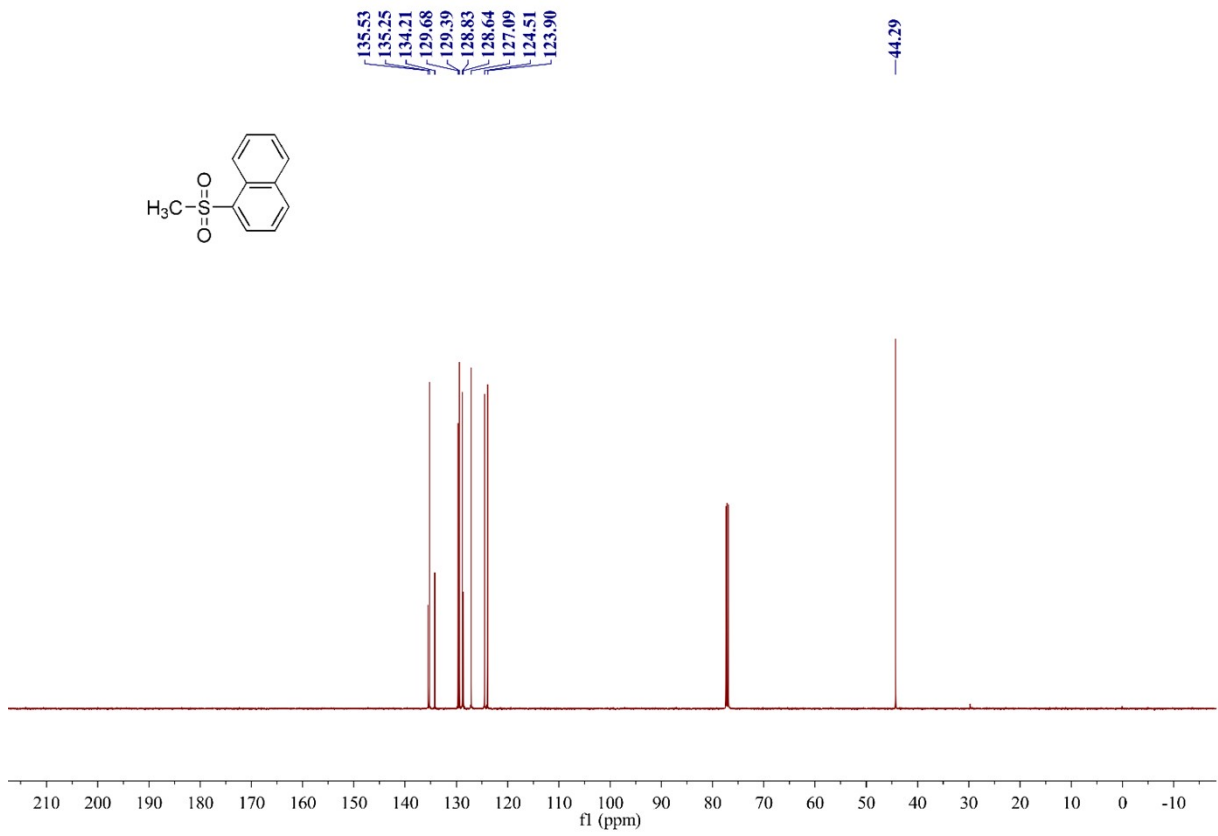

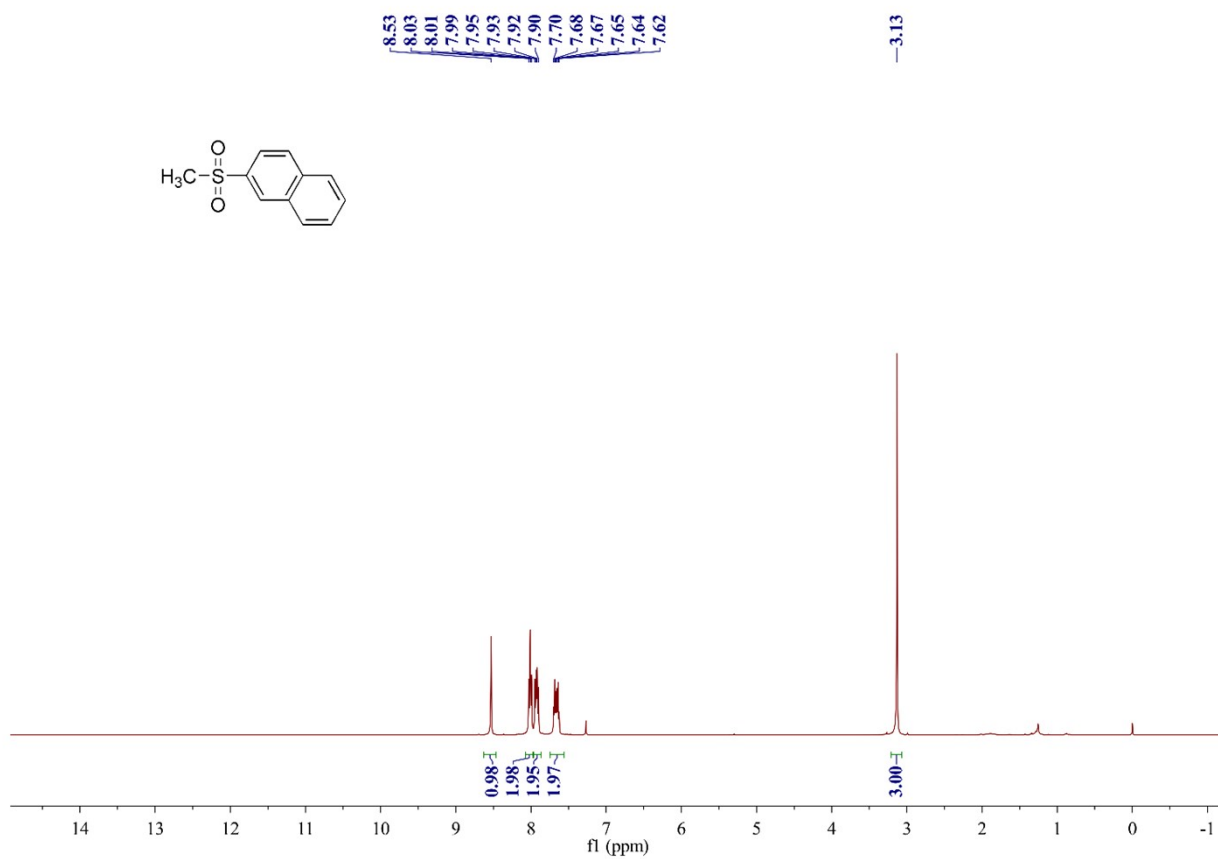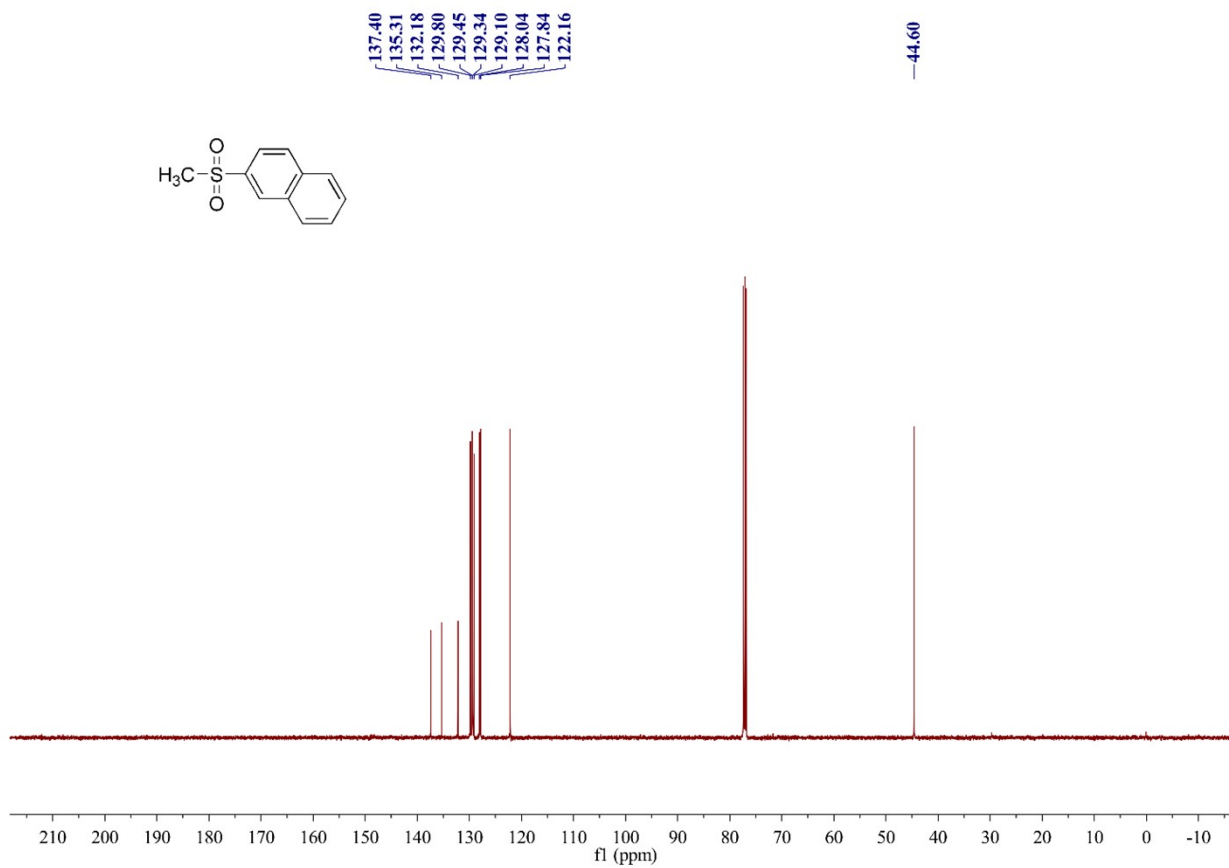



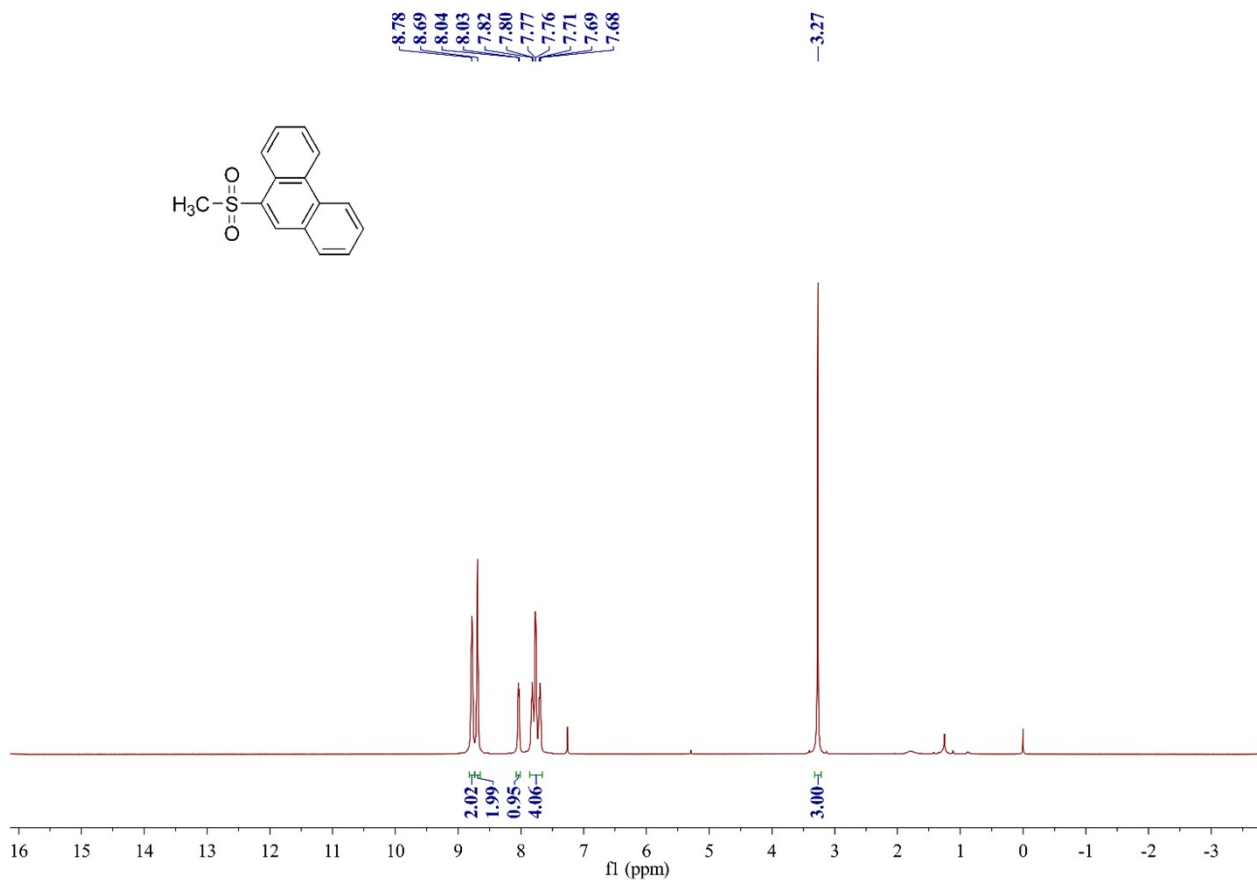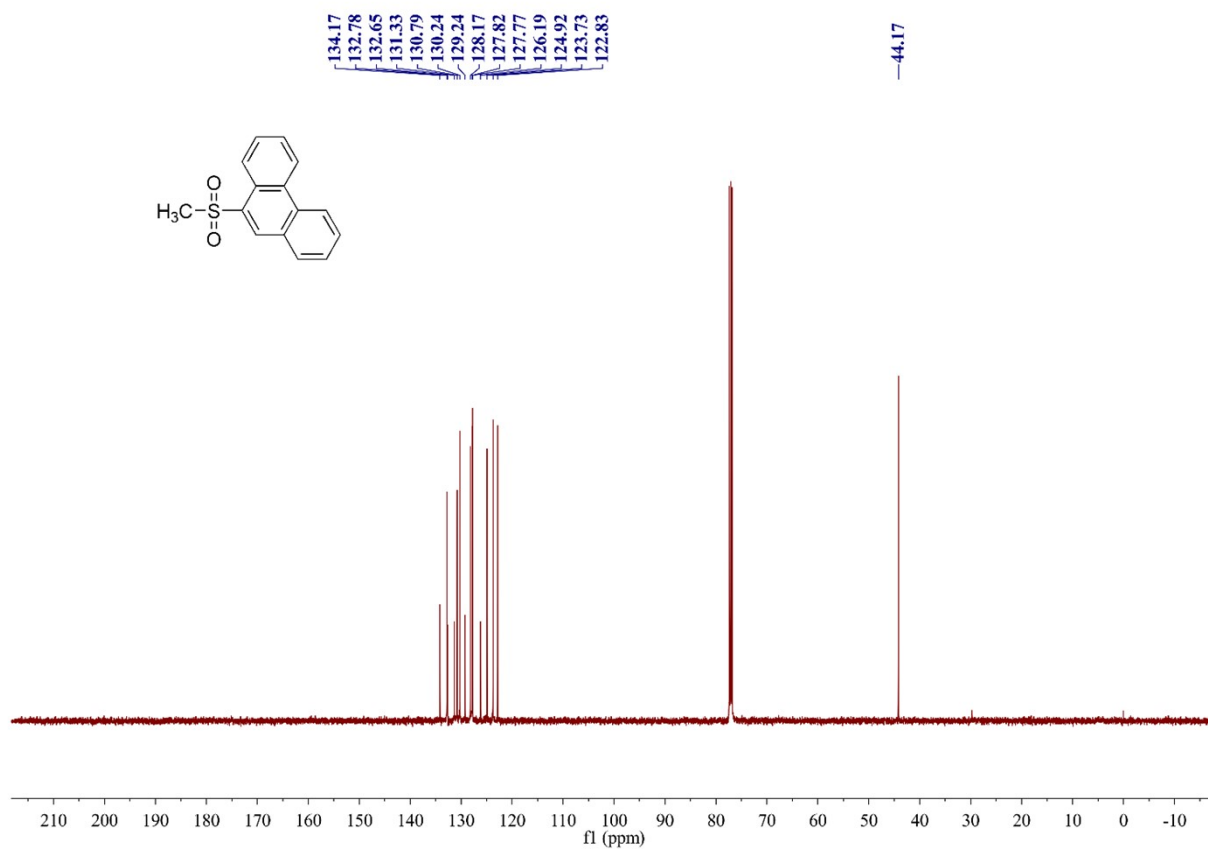

8.18  
8.17  
8.15  
7.97  
7.96  
7.69  
7.67  
7.66  
7.60  
7.59  
7.58  
7.58  
7.57  
7.57  
7.56  
7.56  
7.55  
7.54  
7.54  
7.53  
7.52

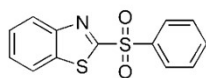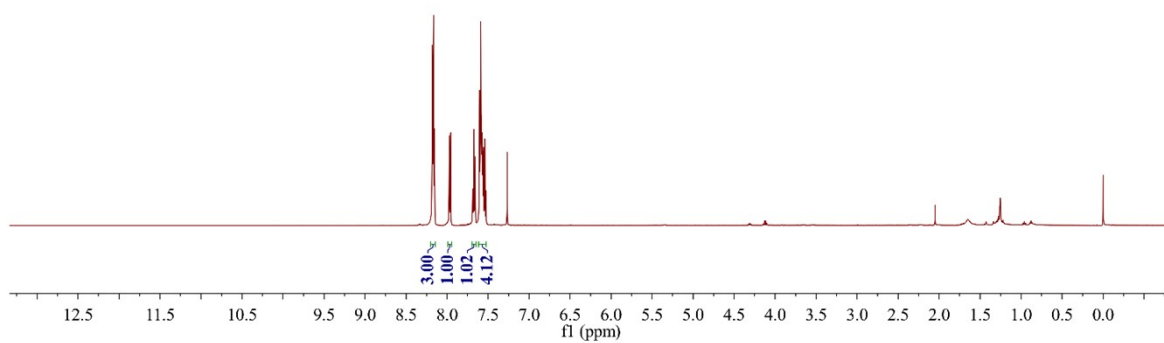

167.26  
152.93  
138.47  
137.07  
134.63  
129.58  
128.98  
127.94  
127.57  
125.59  
122.26

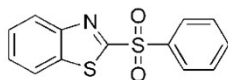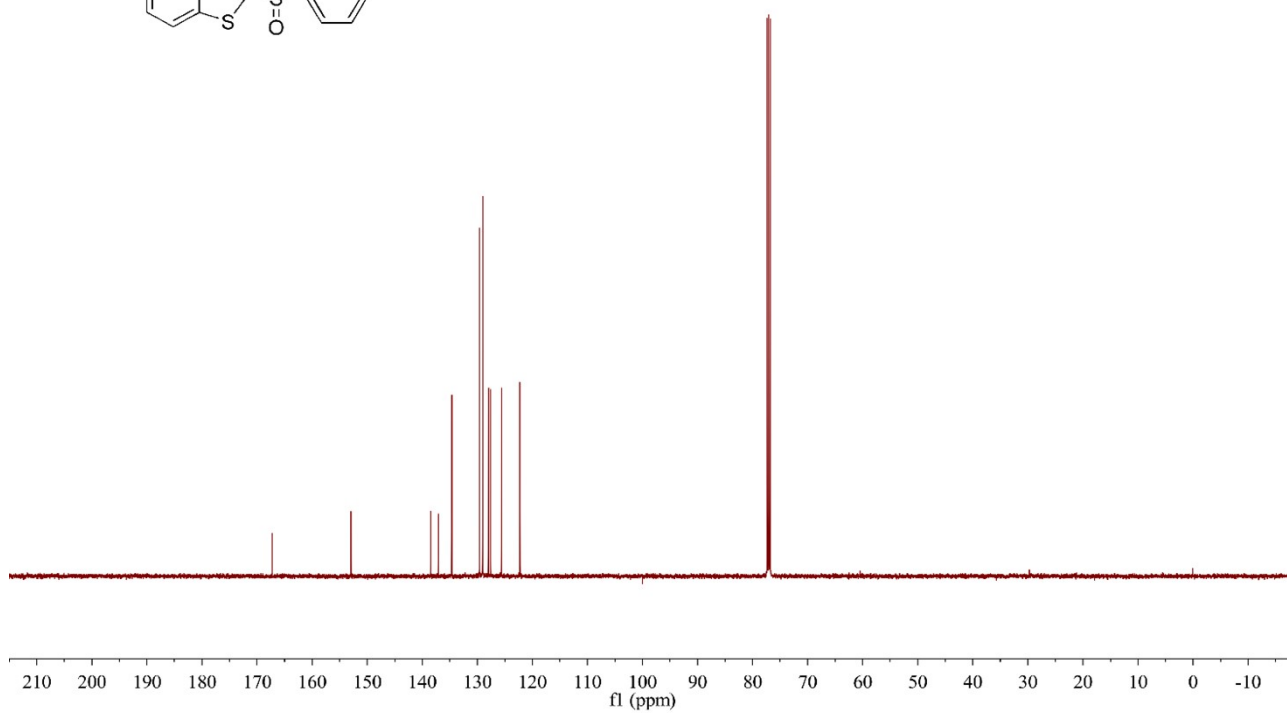

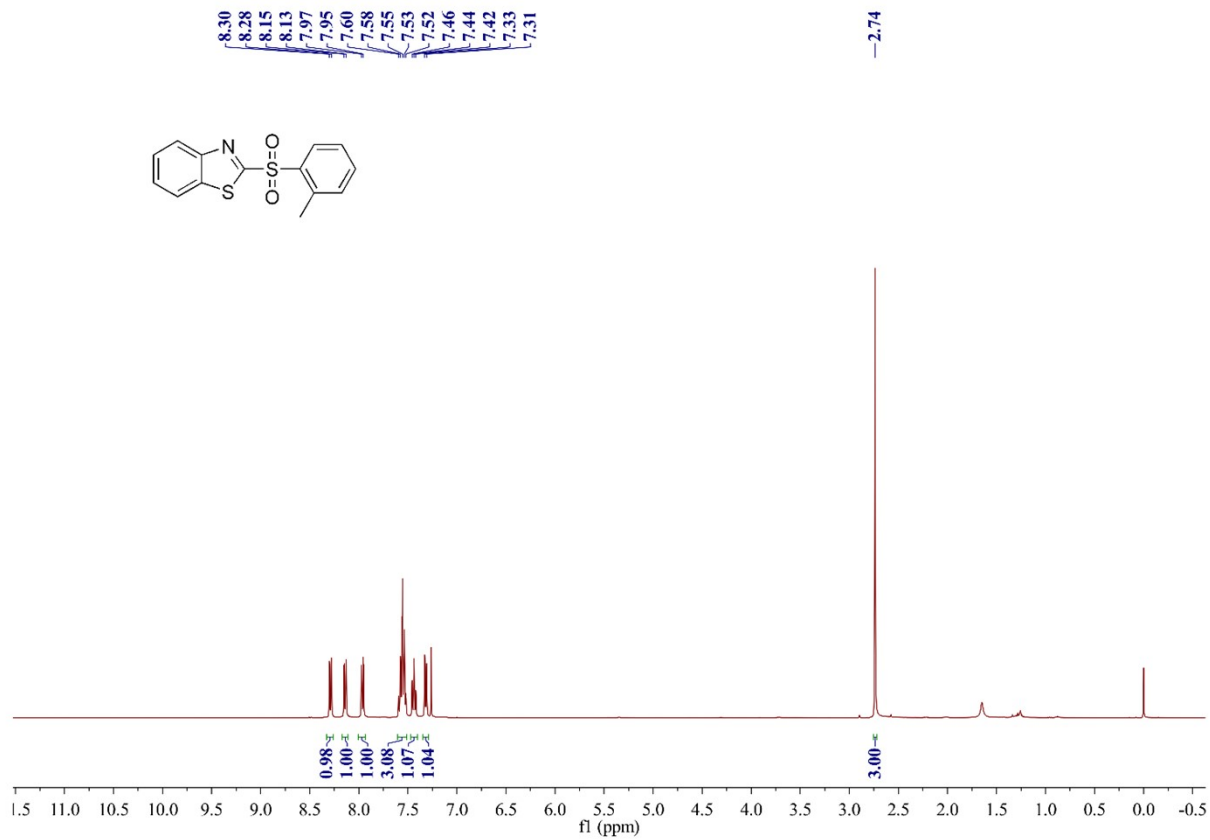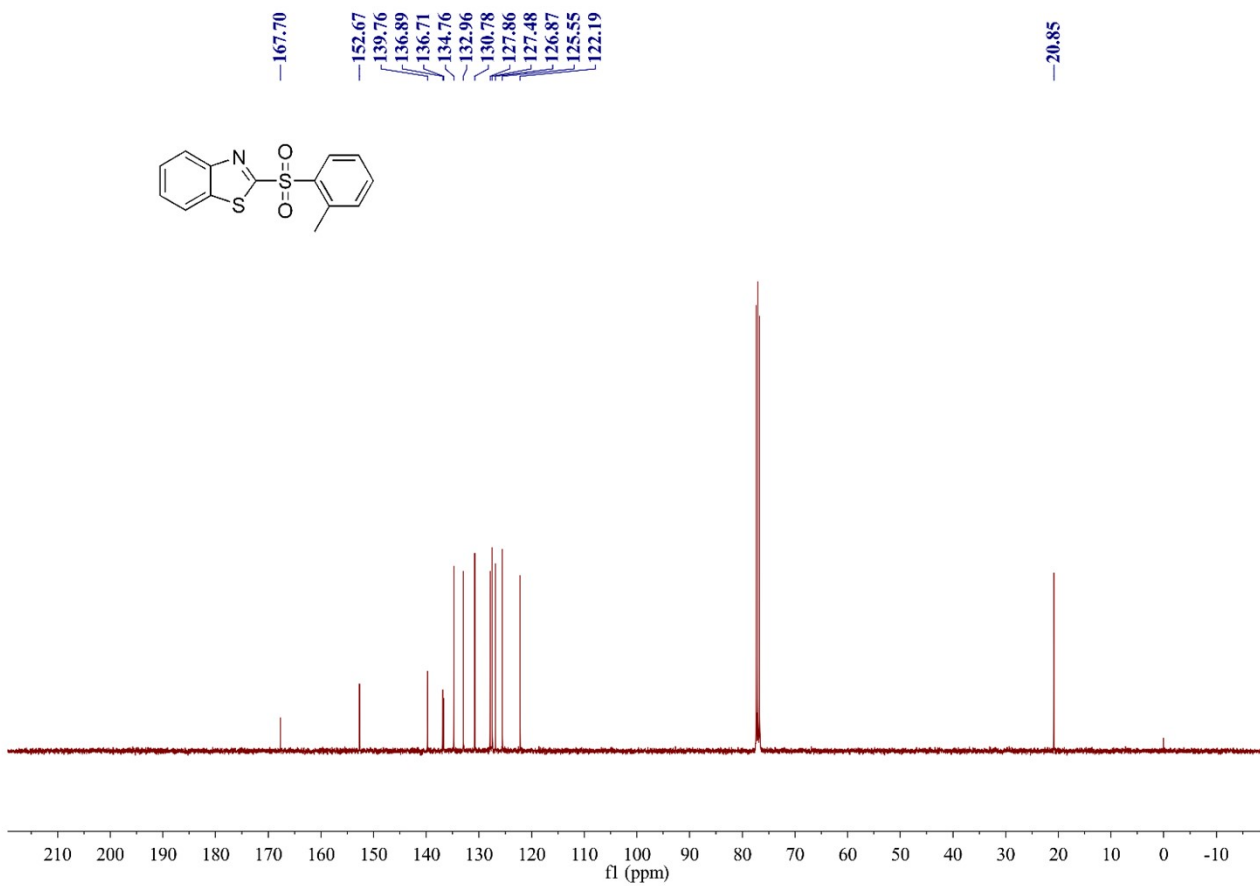

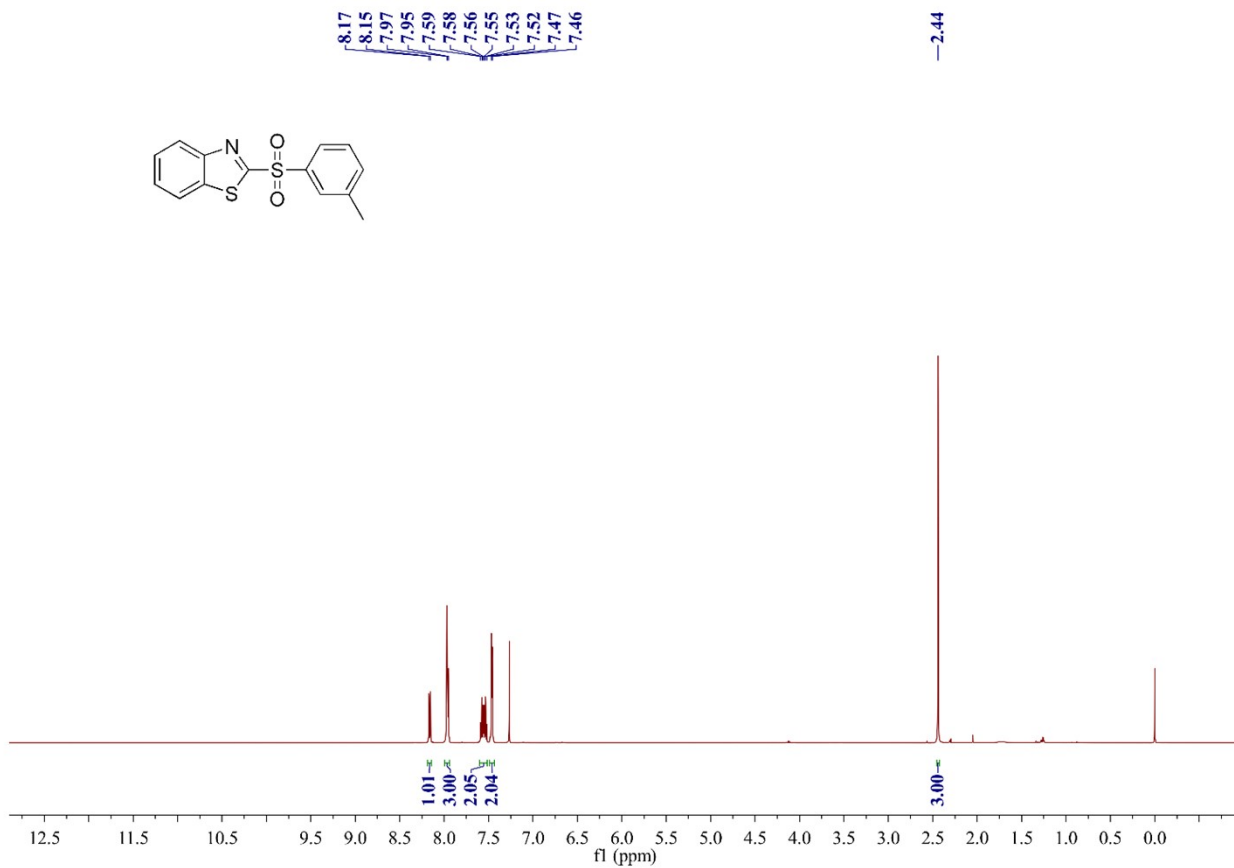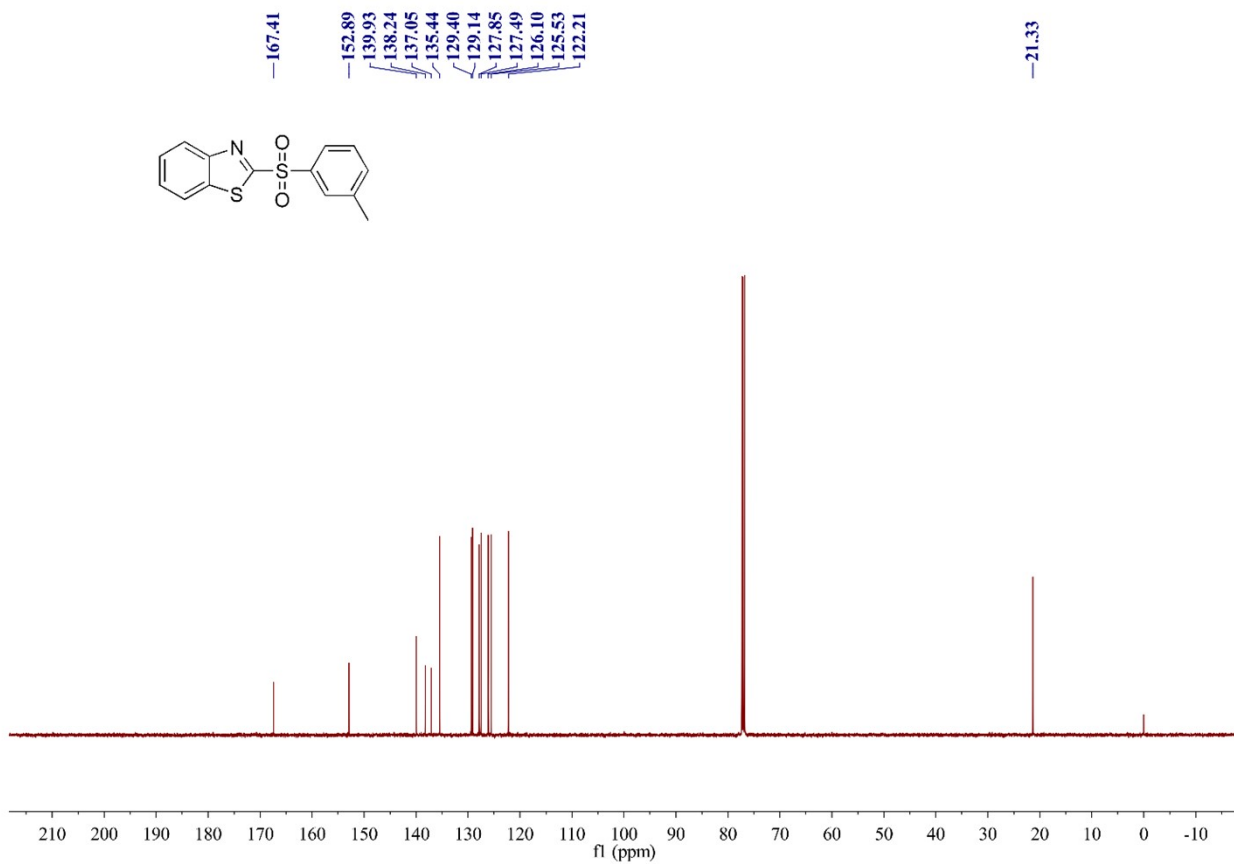

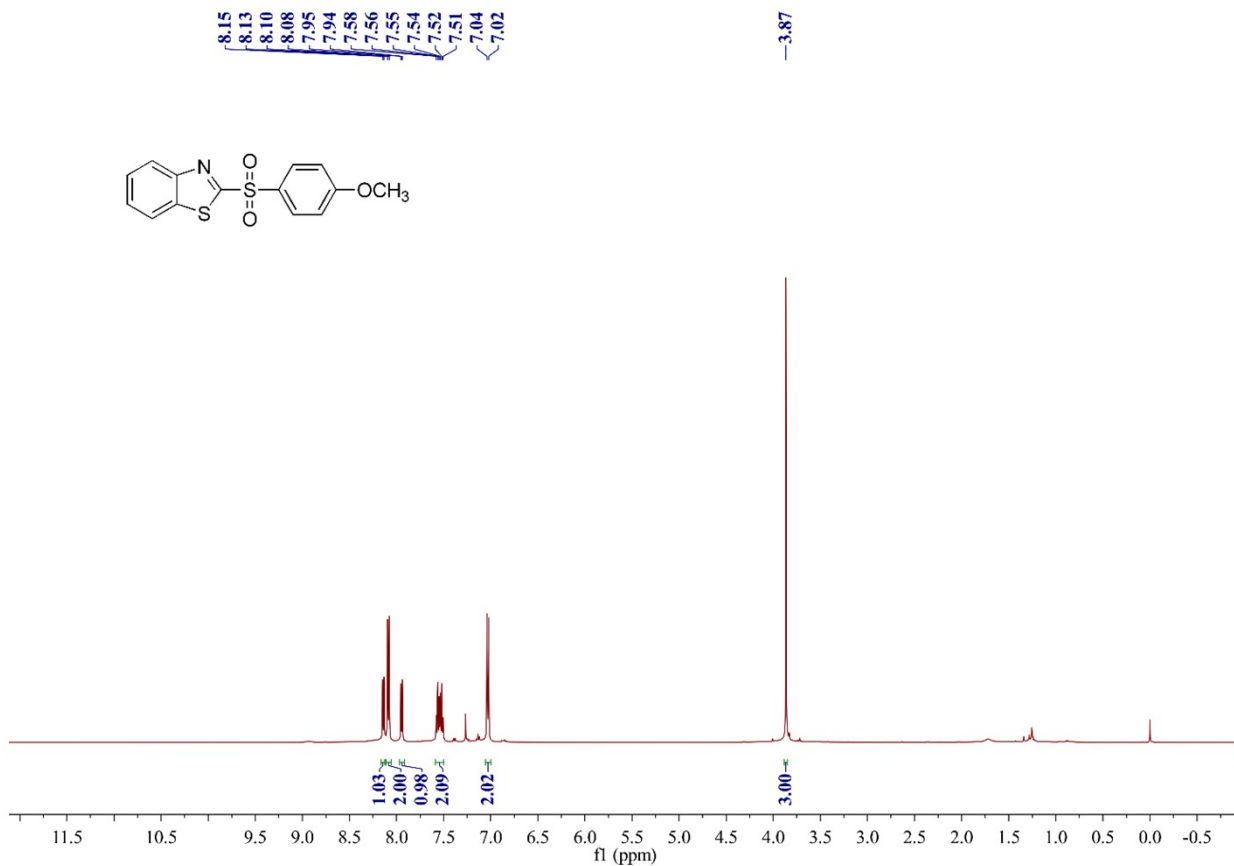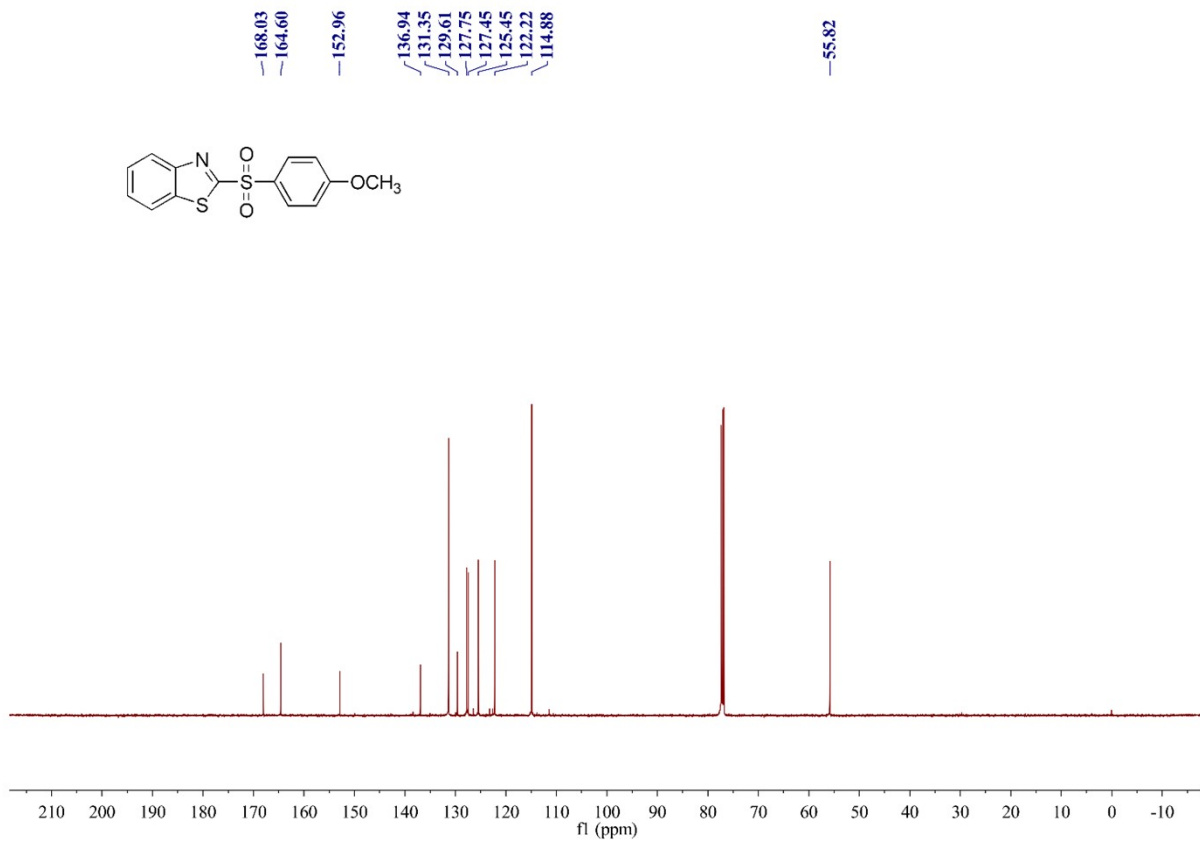

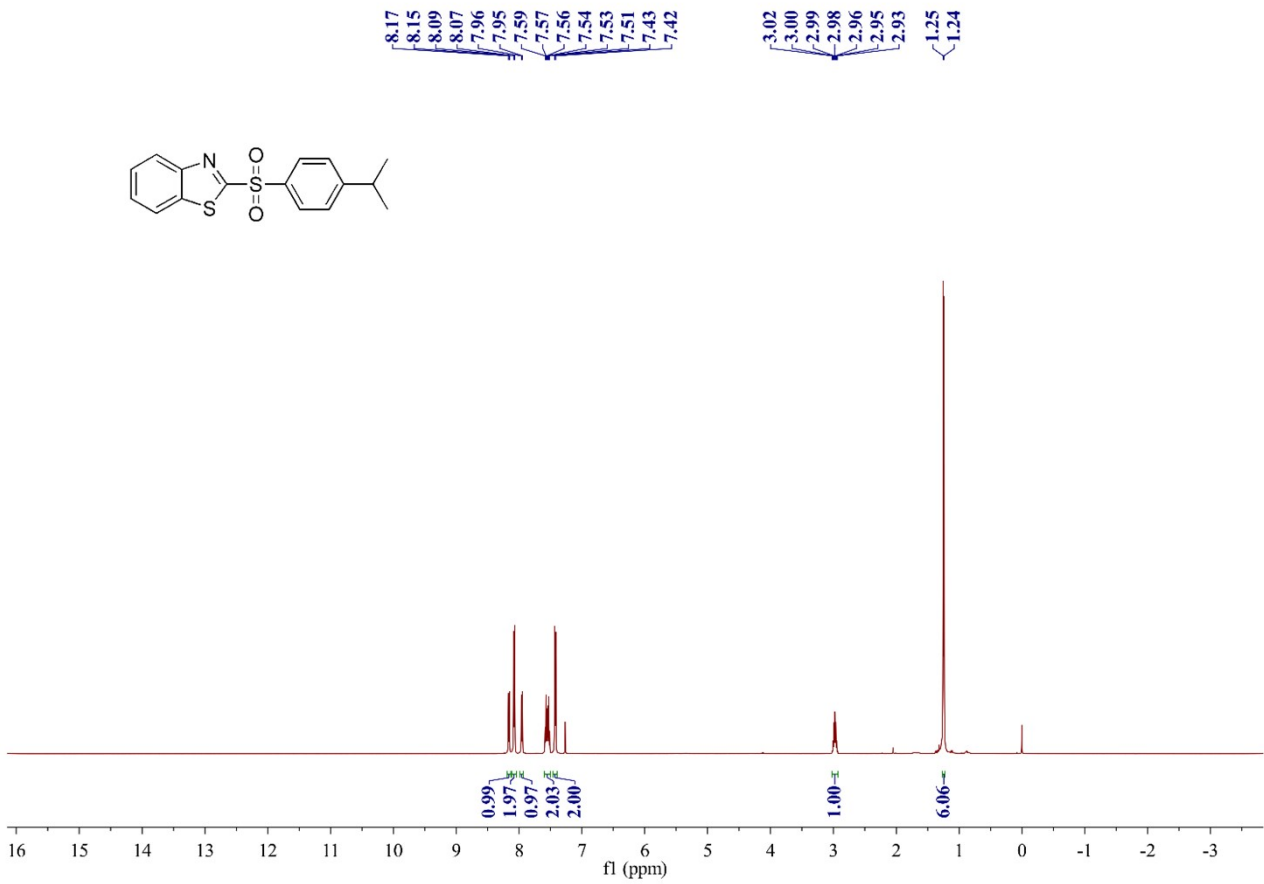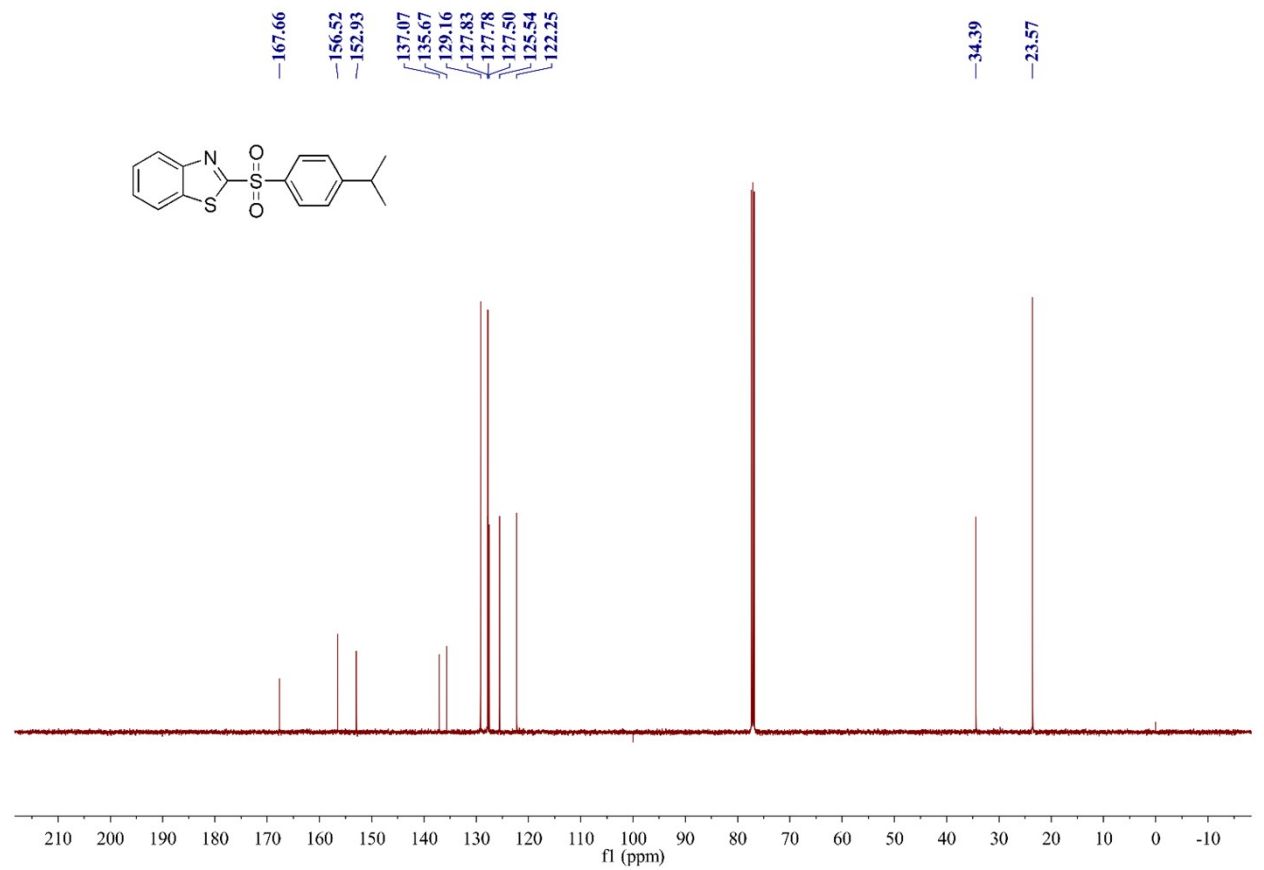

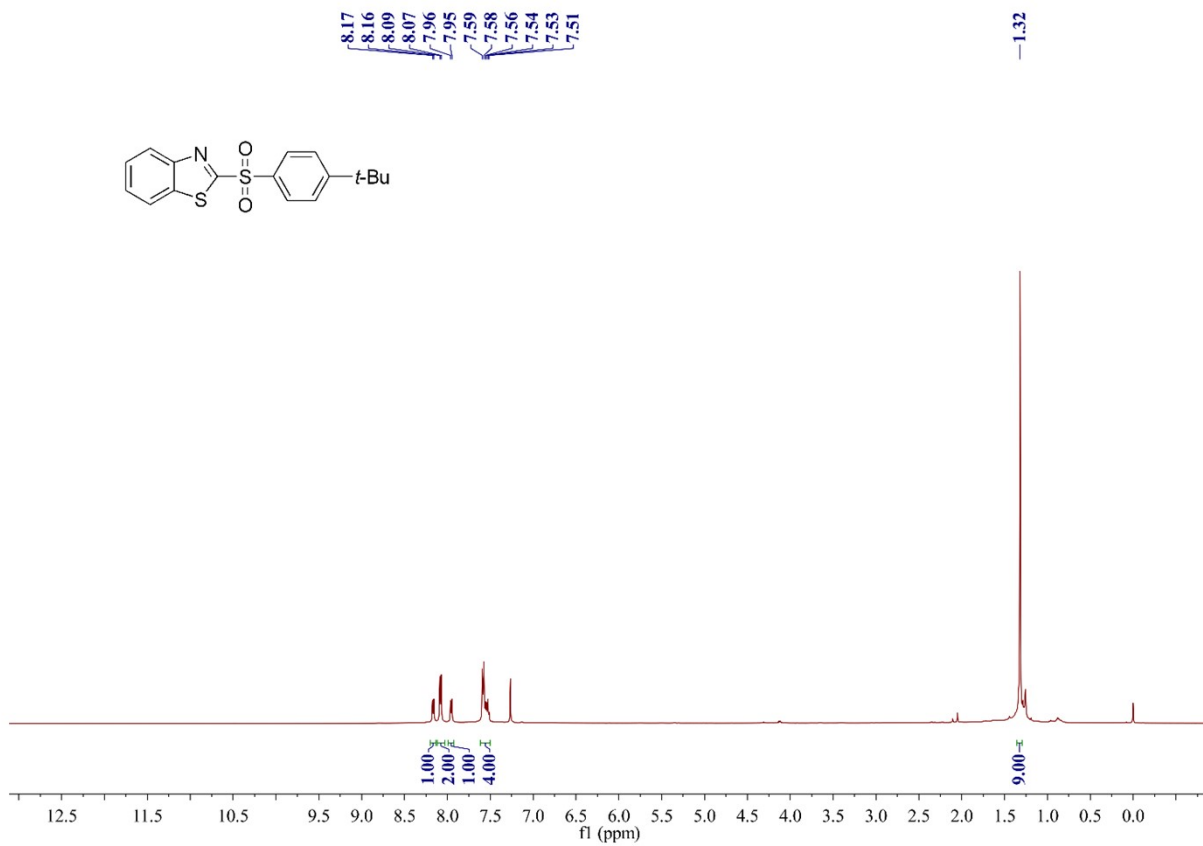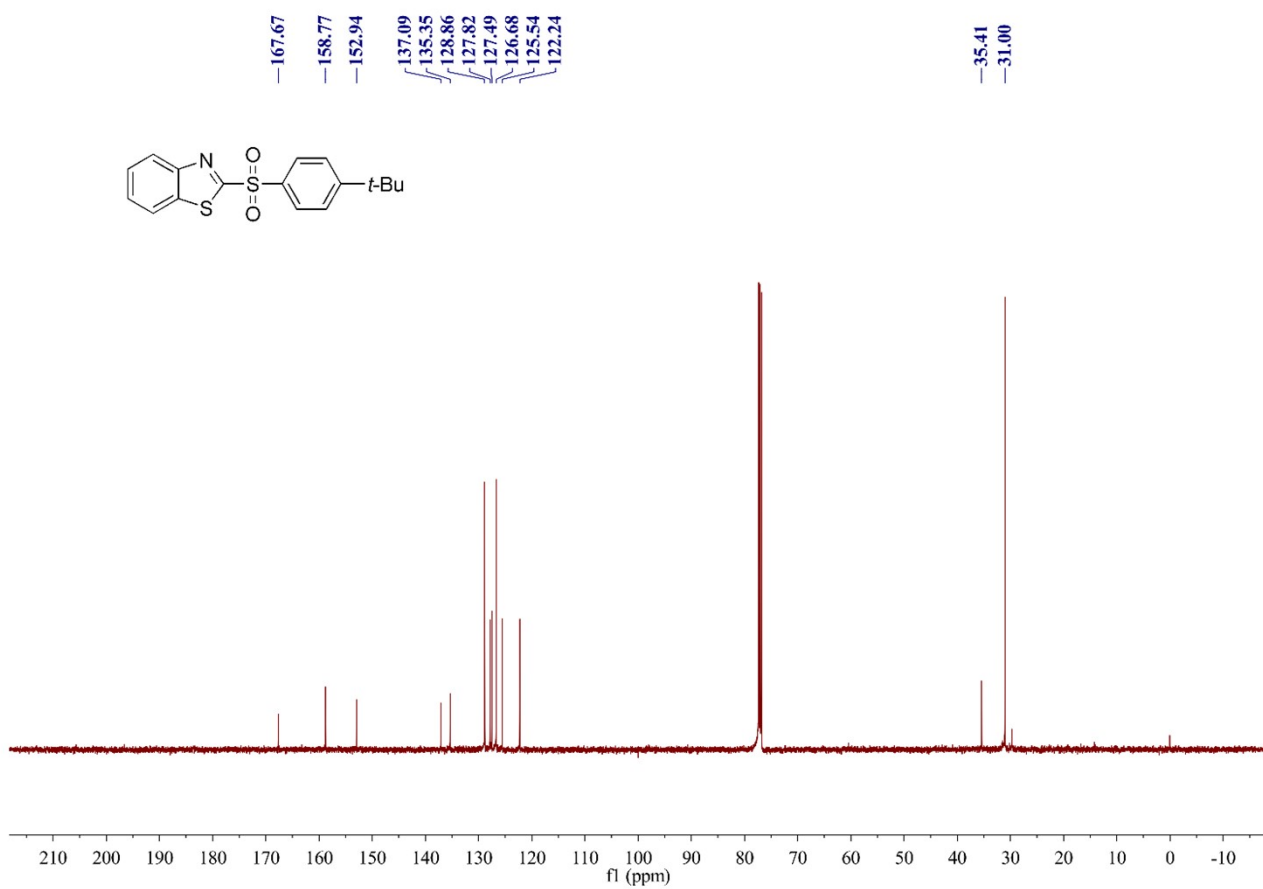





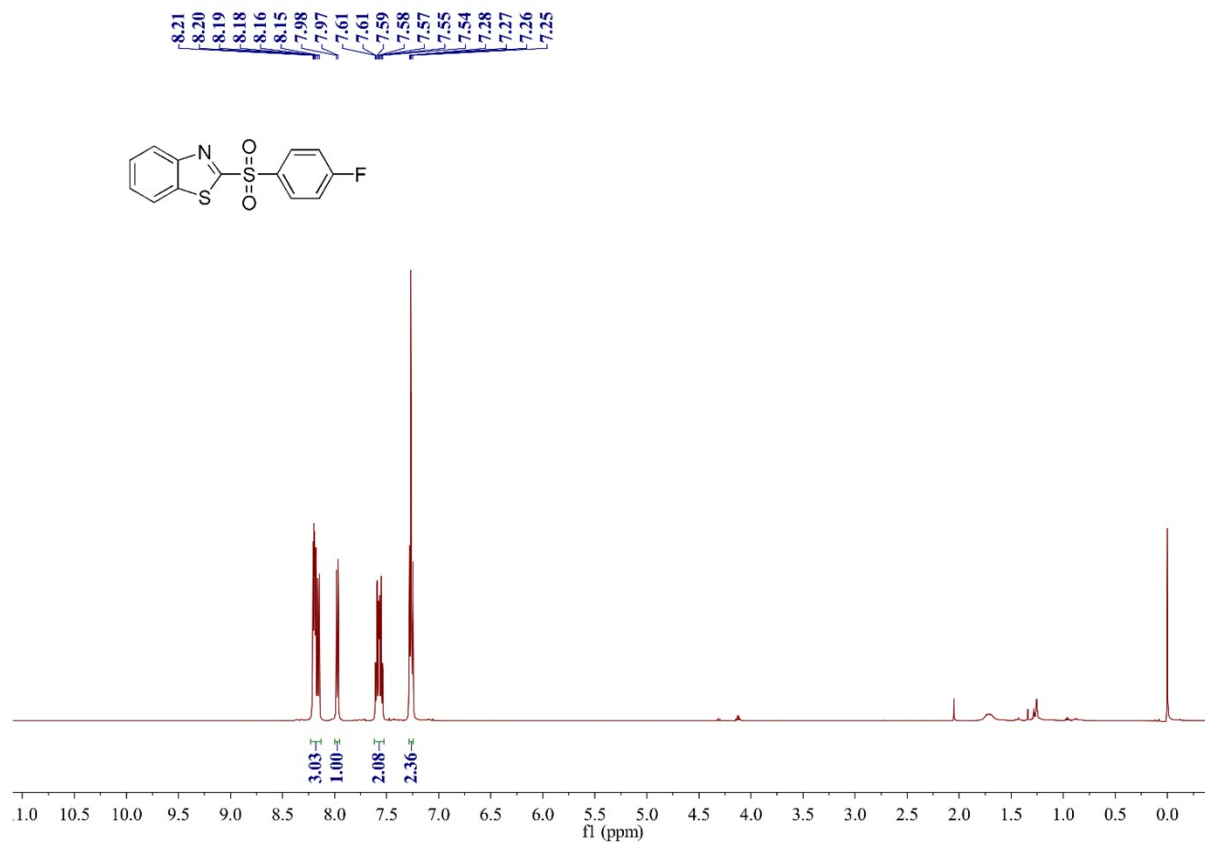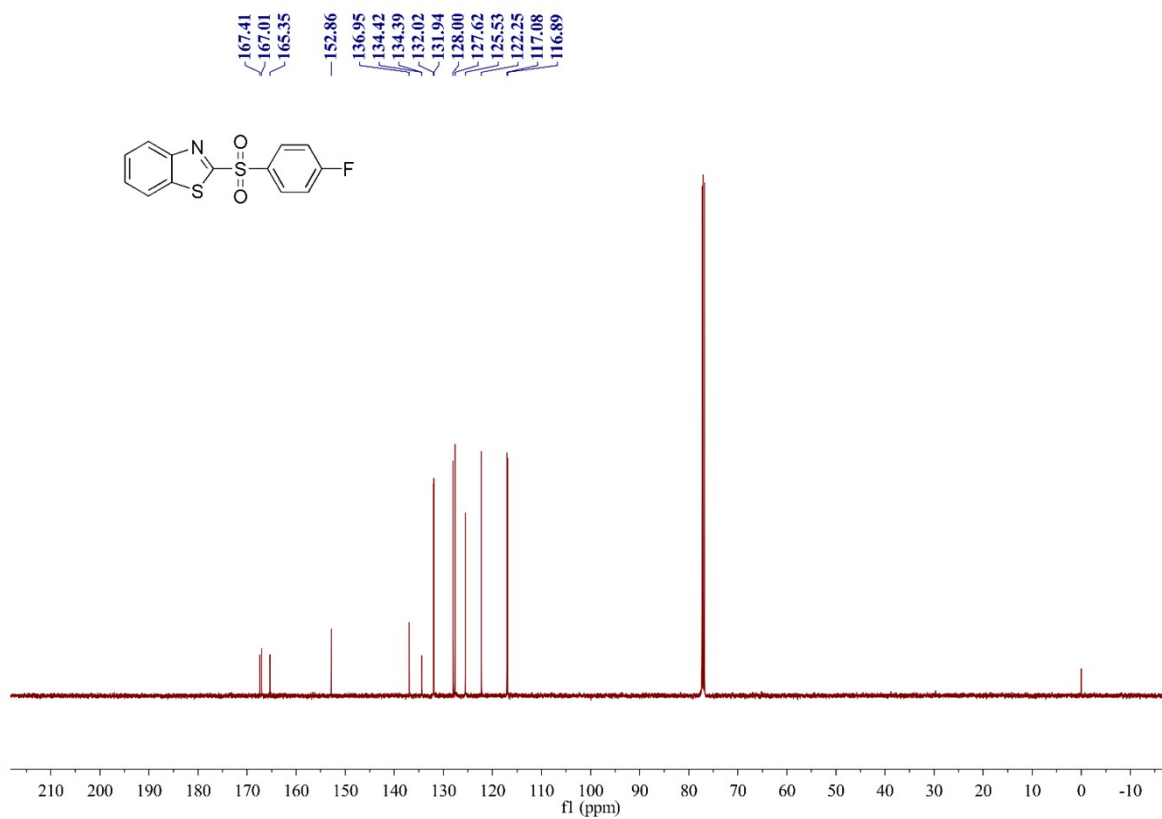

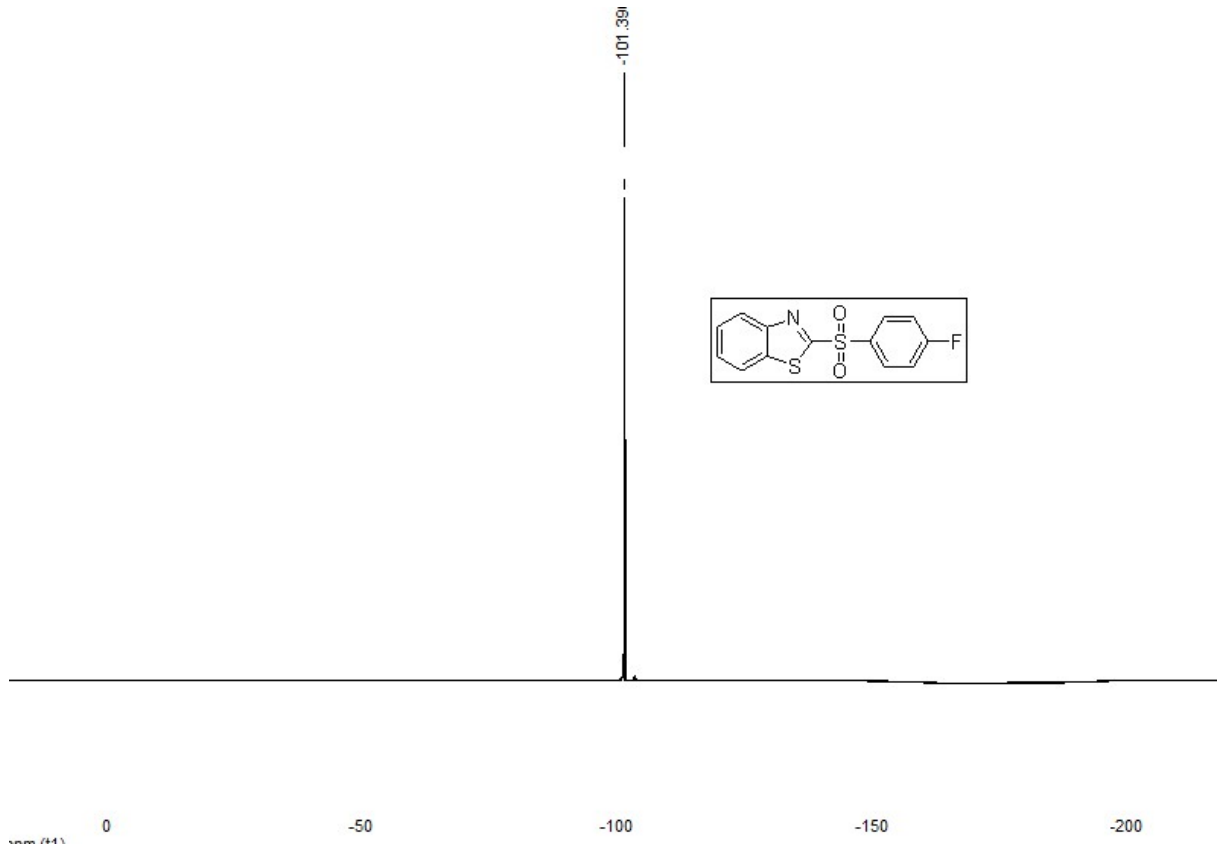

8.16  
8.15  
8.11  
8.09  
7.98  
7.96  
7.61  
7.59  
7.58  
7.56  
7.55

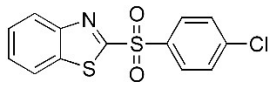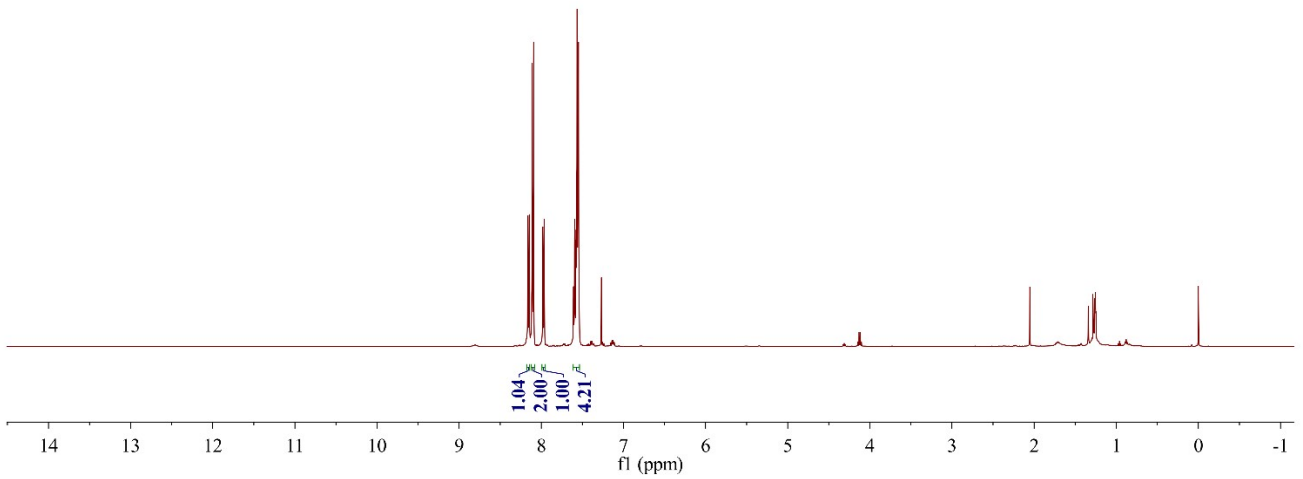

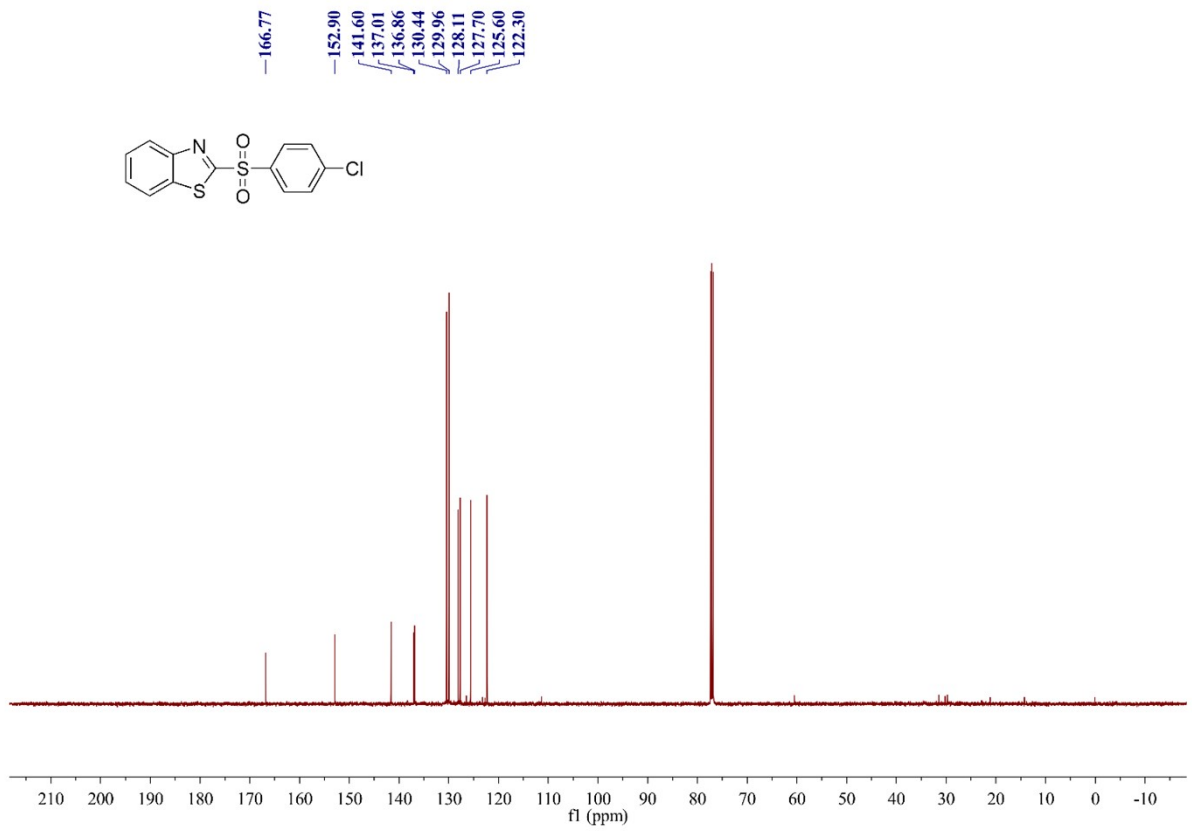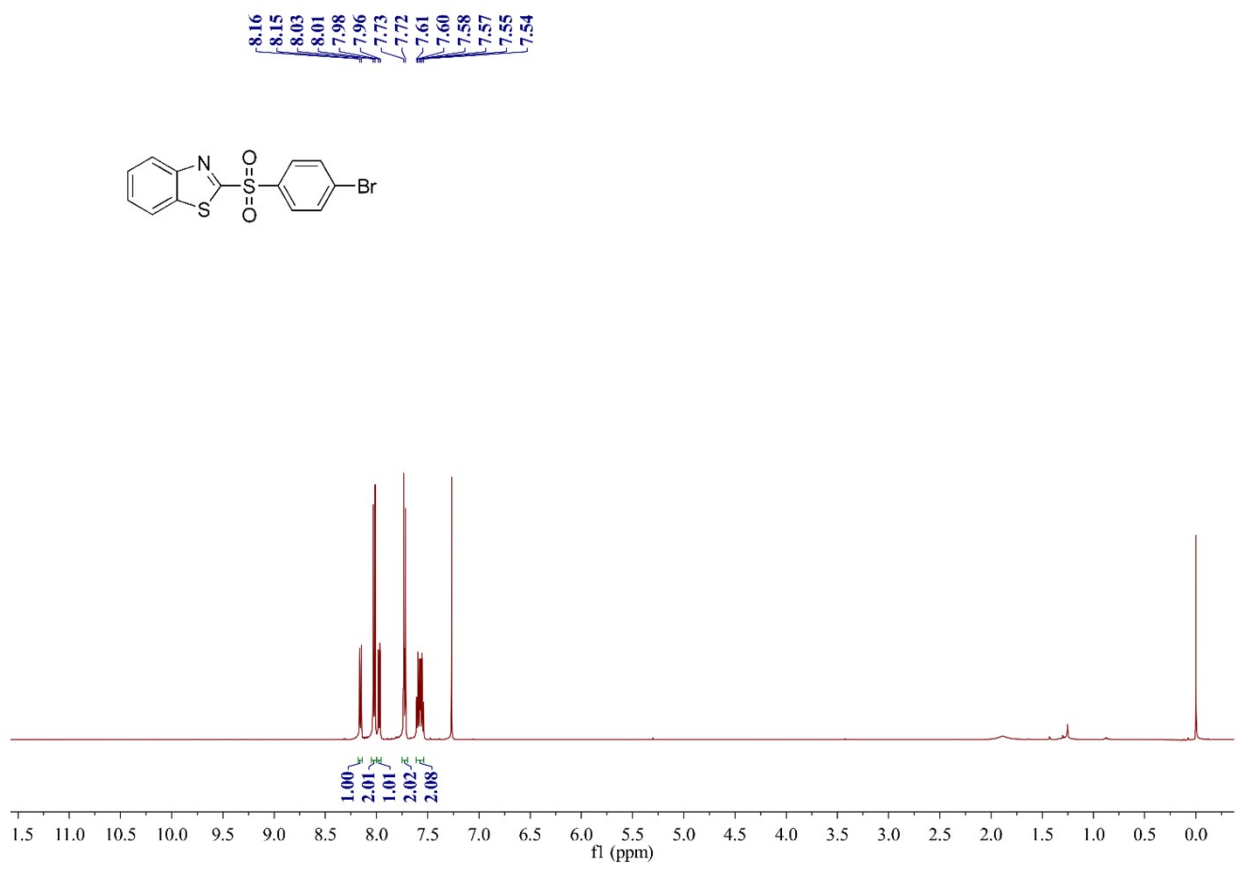

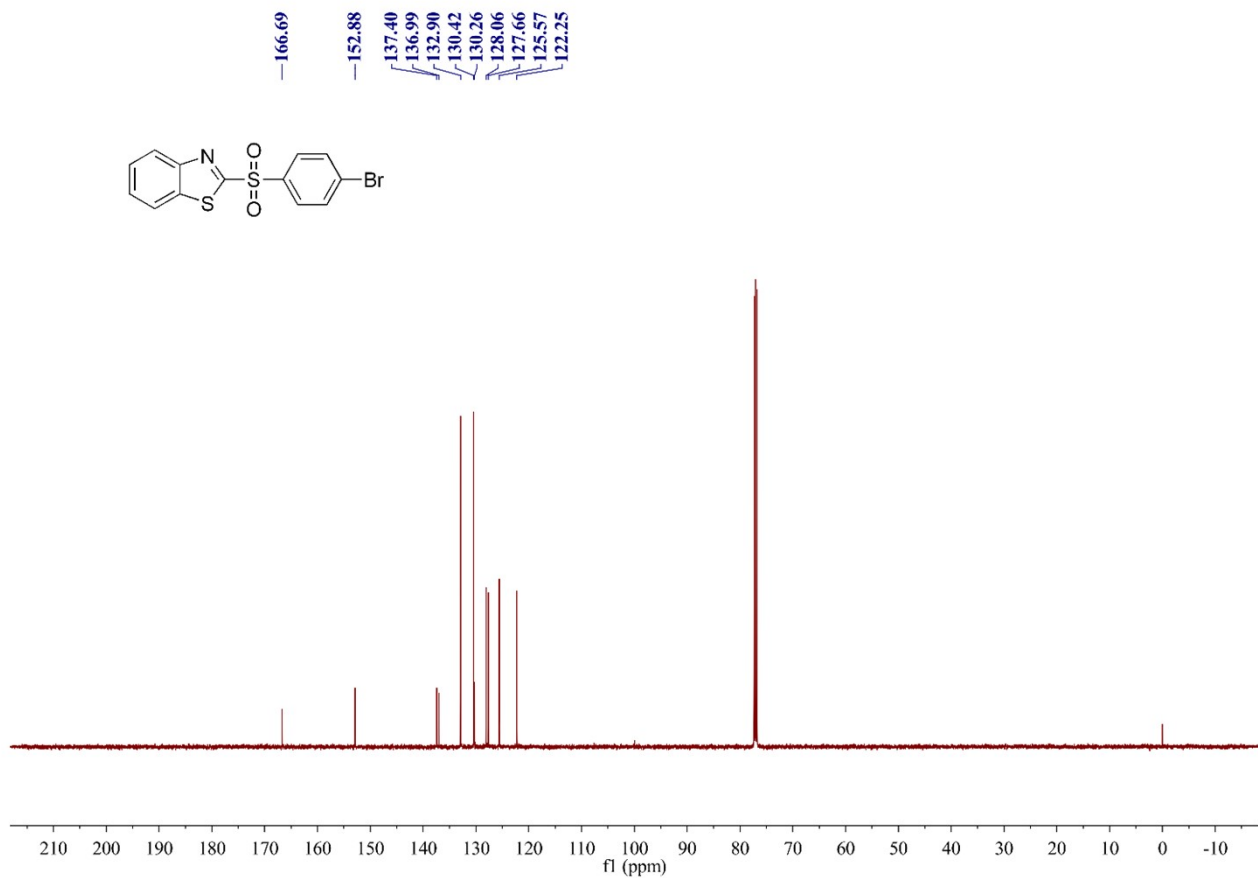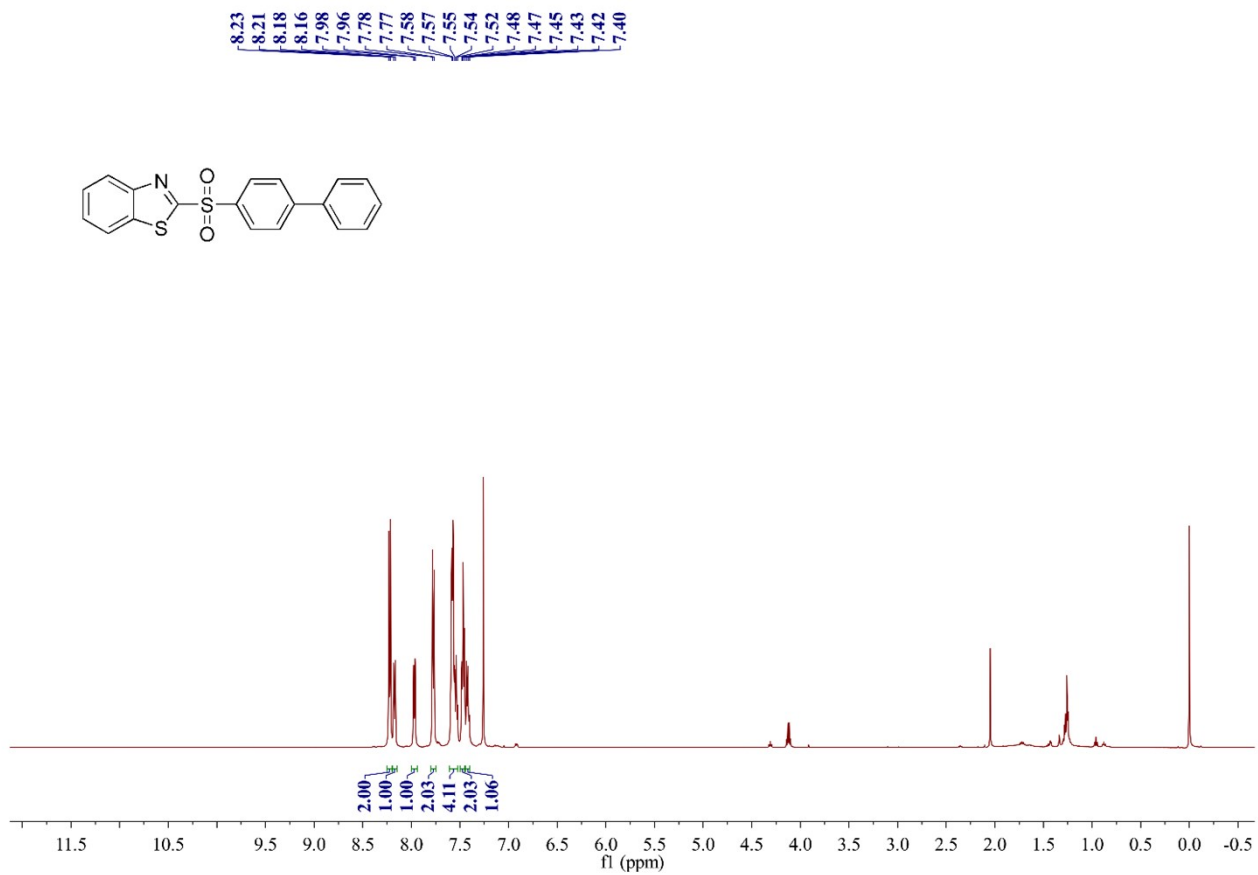

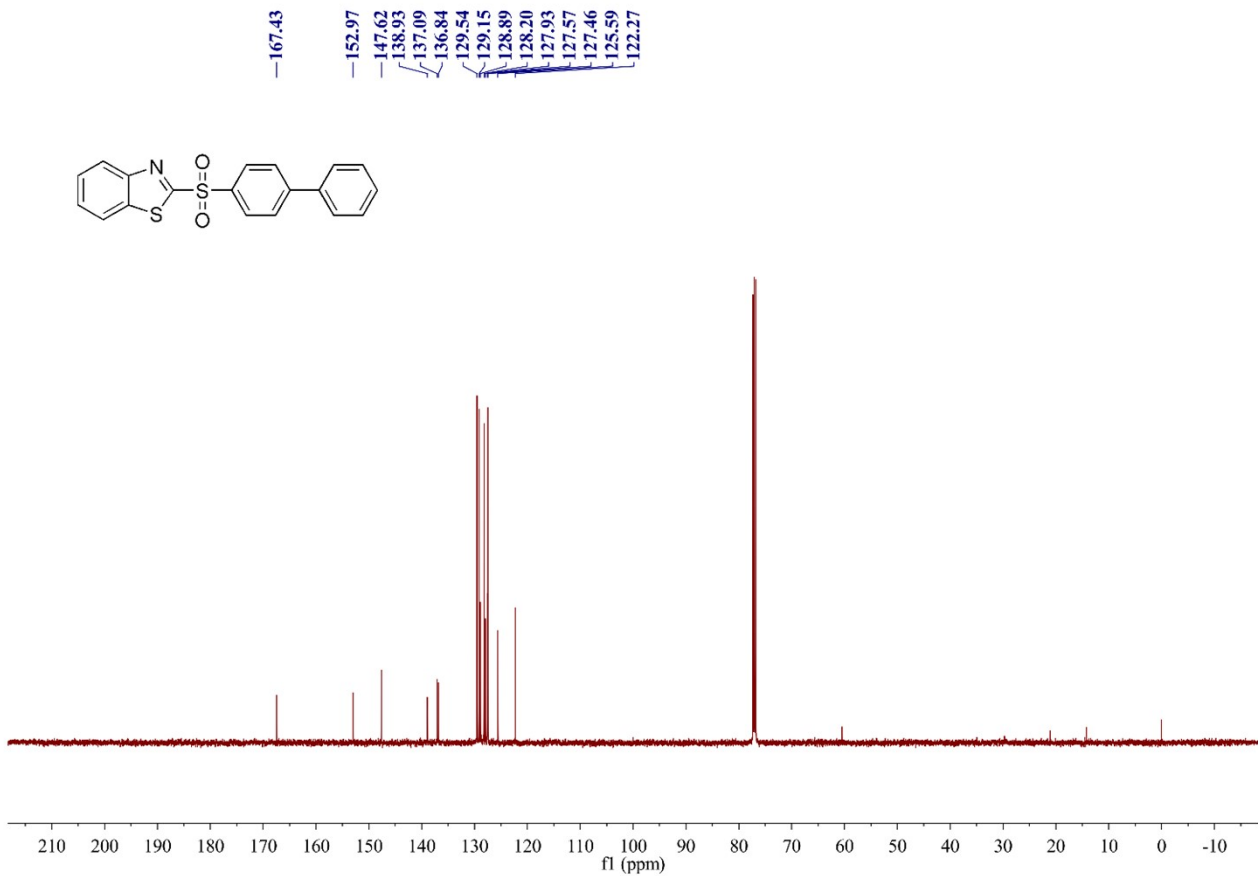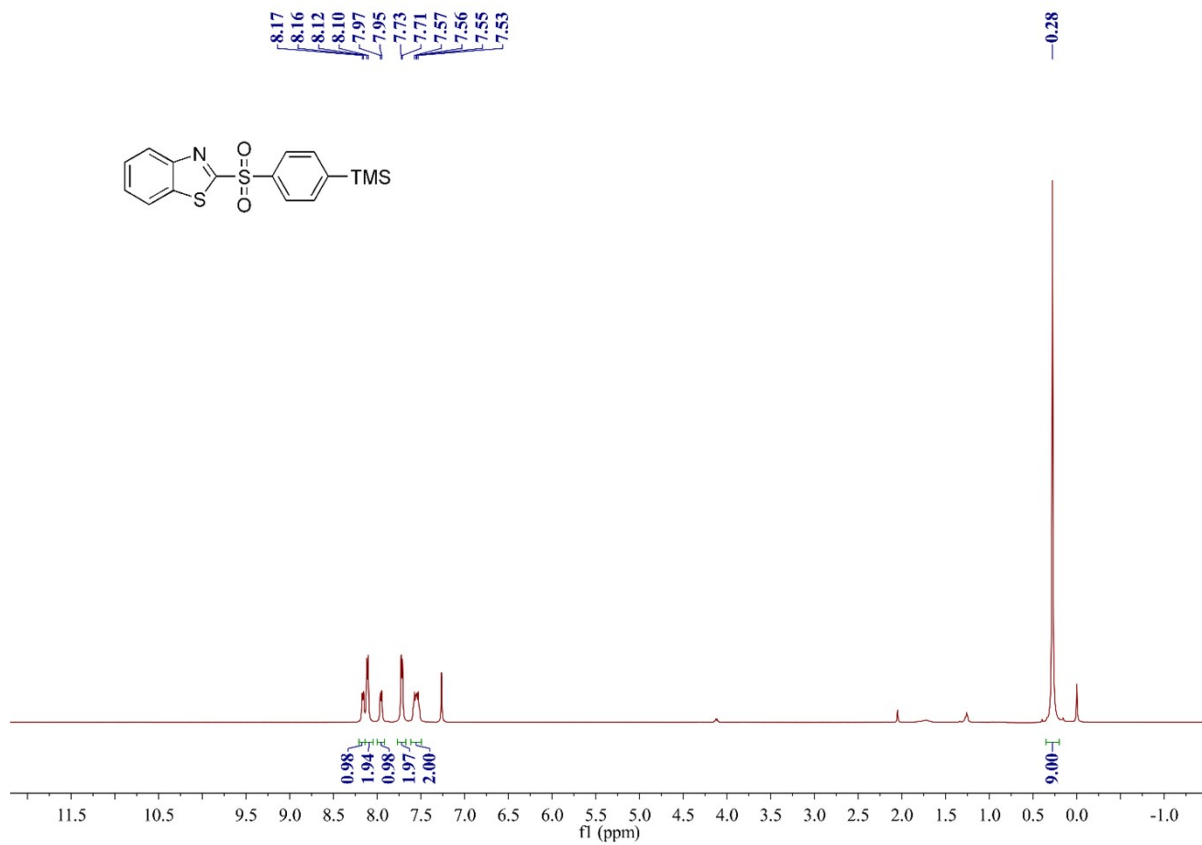

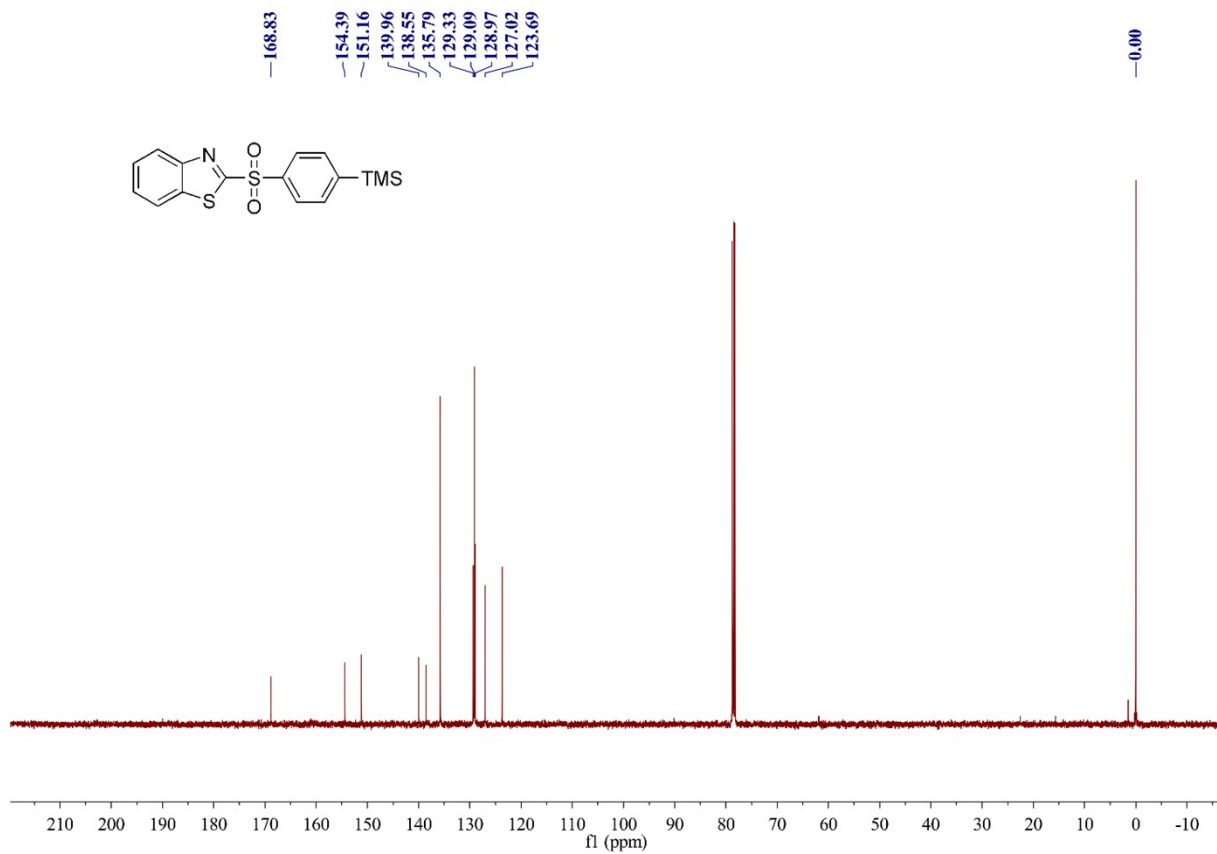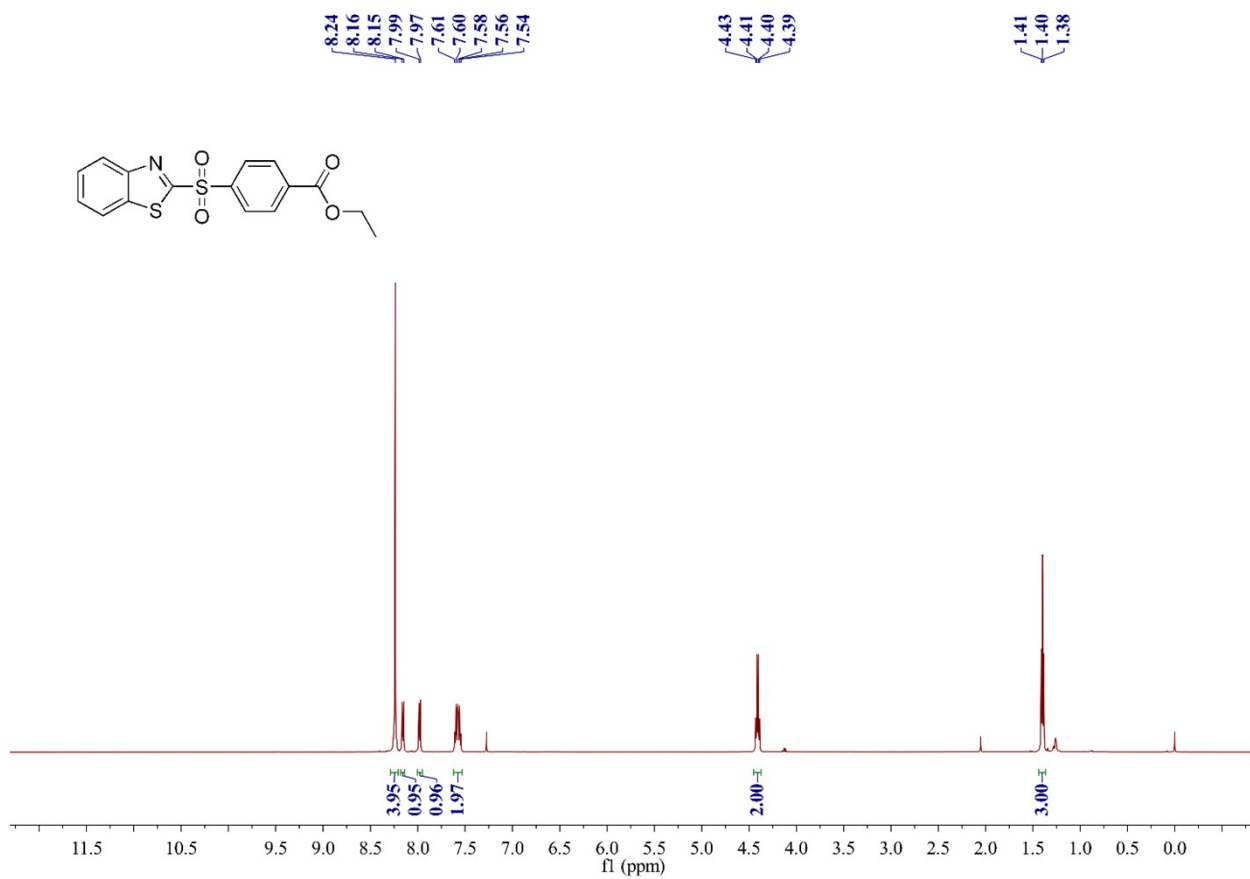

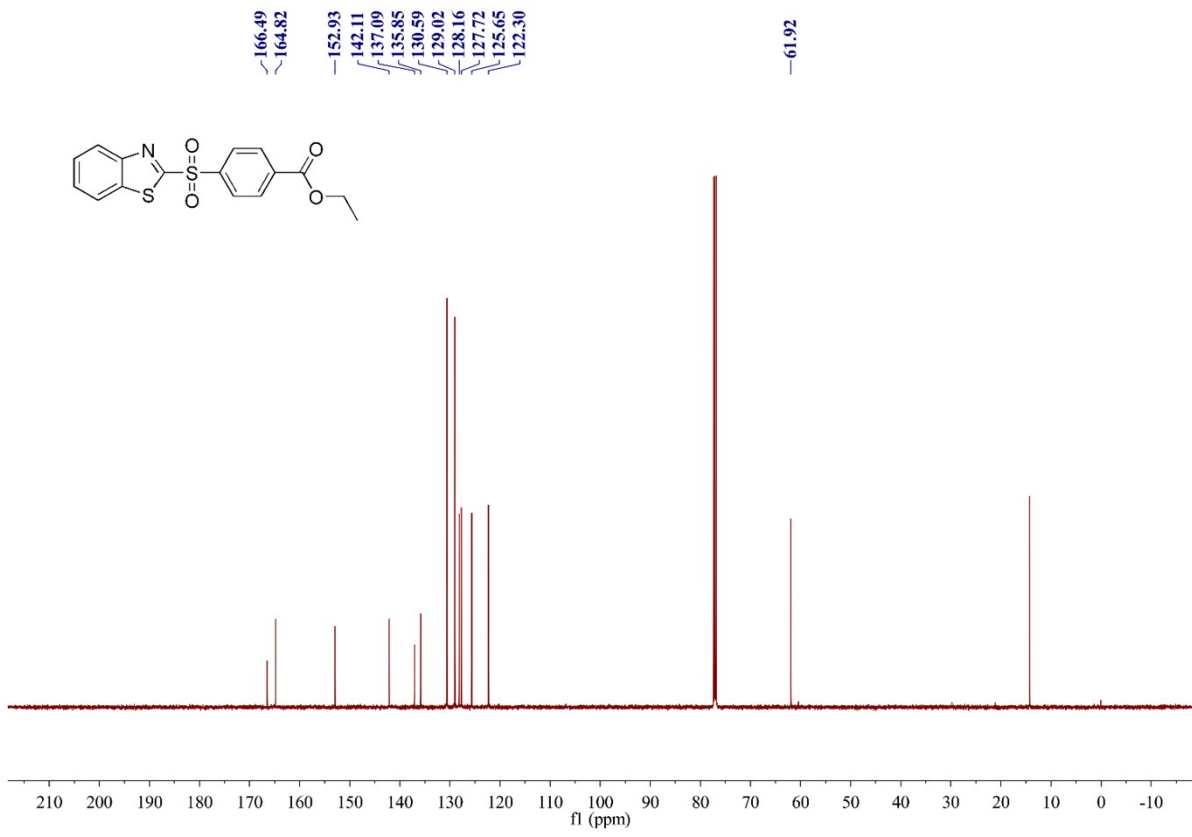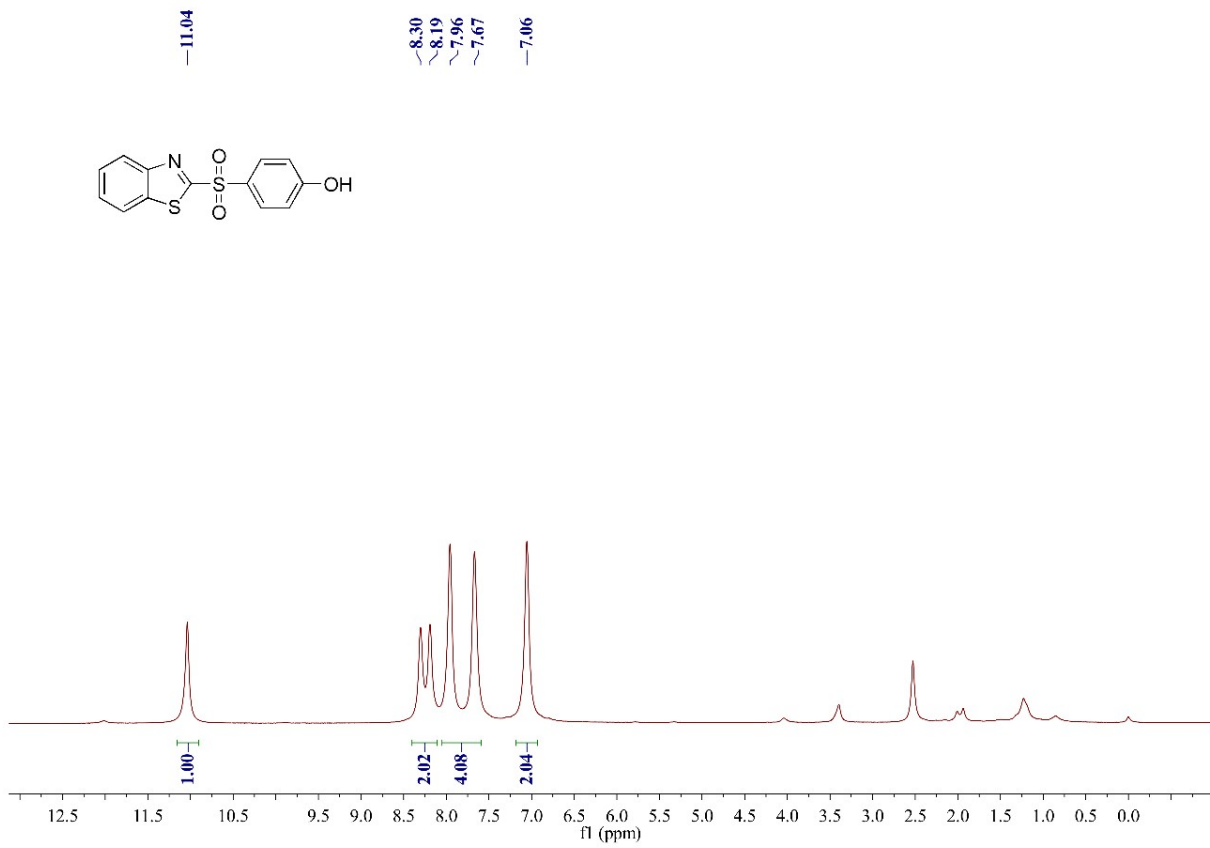

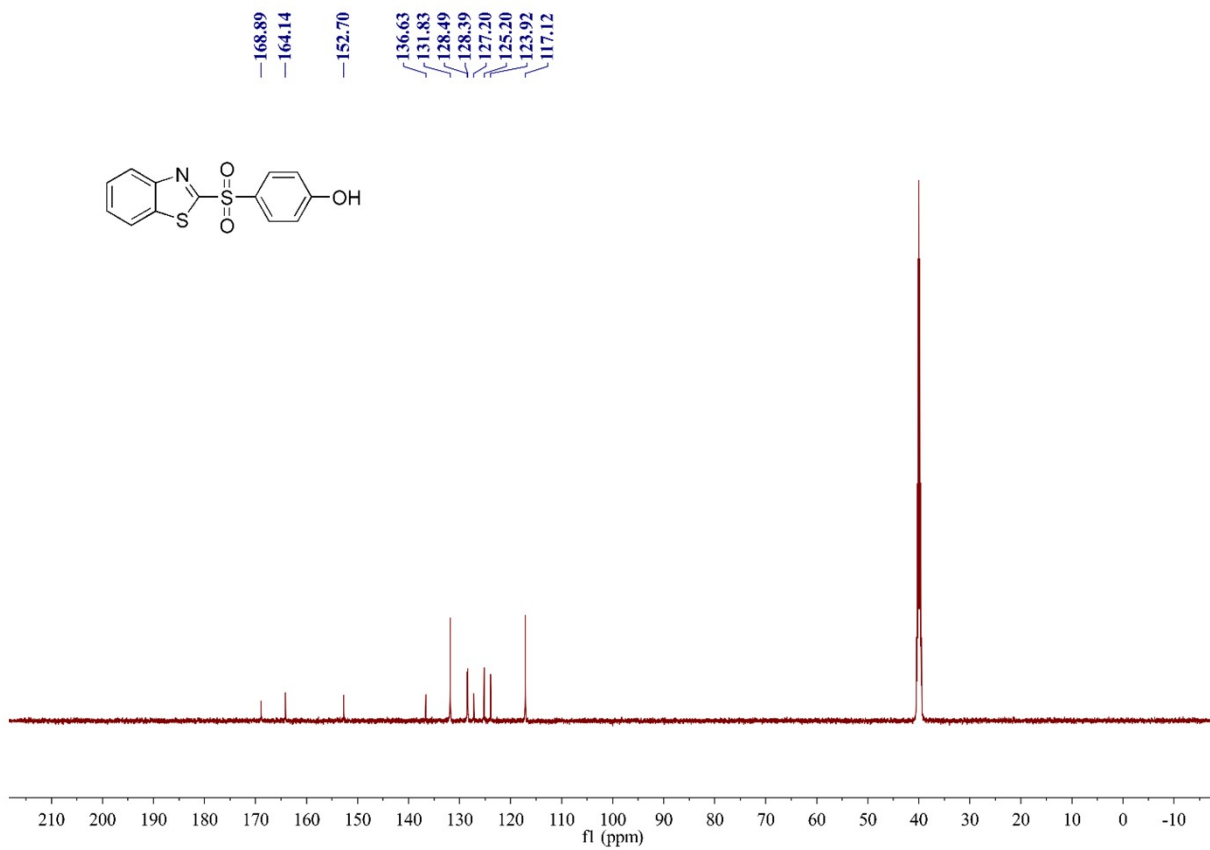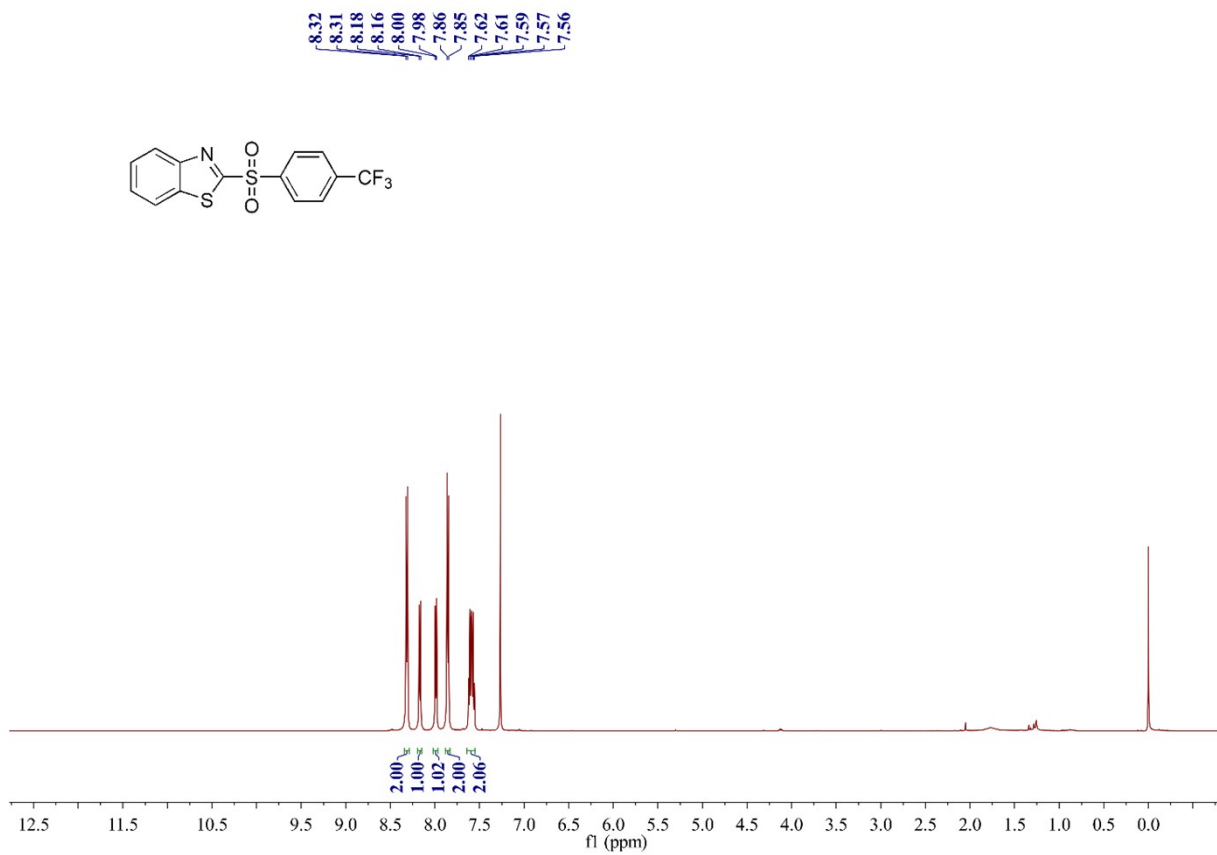



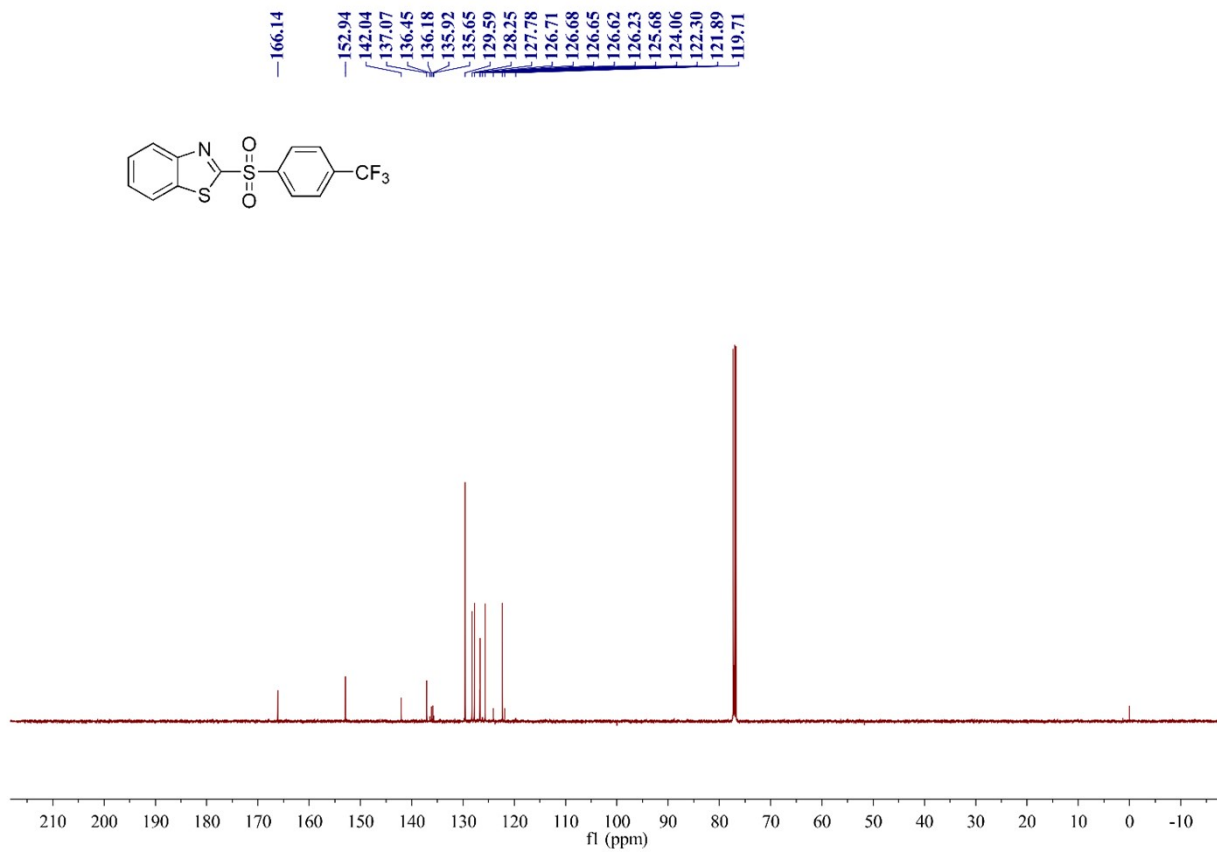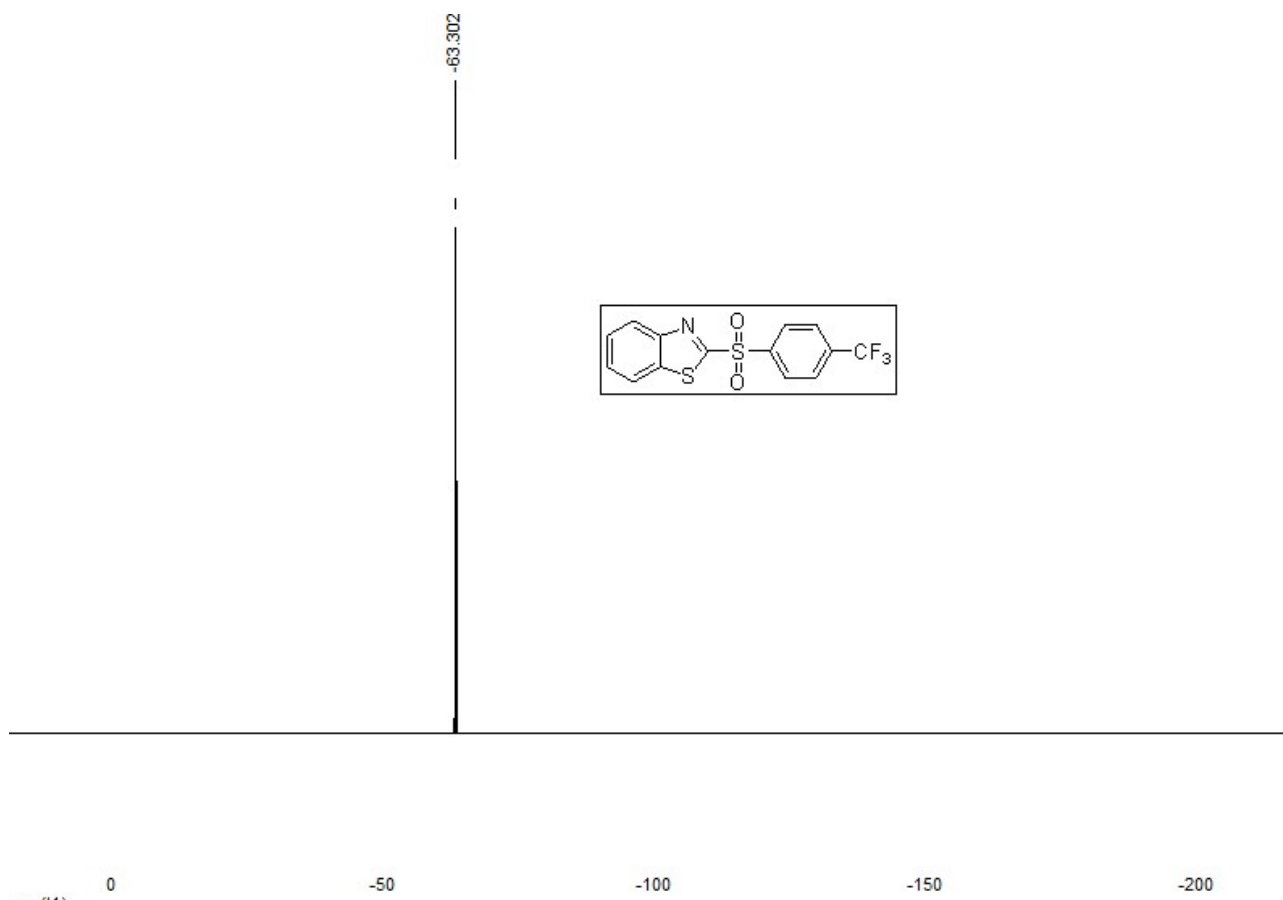

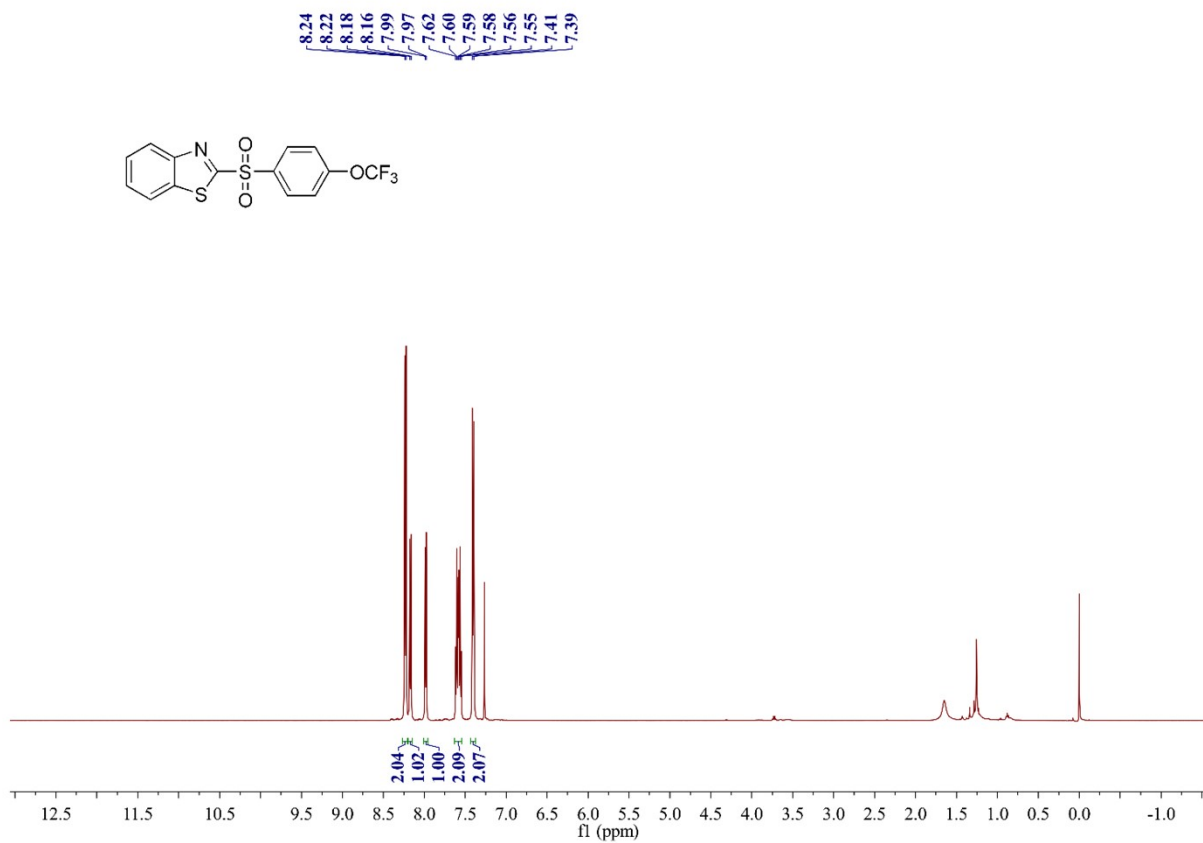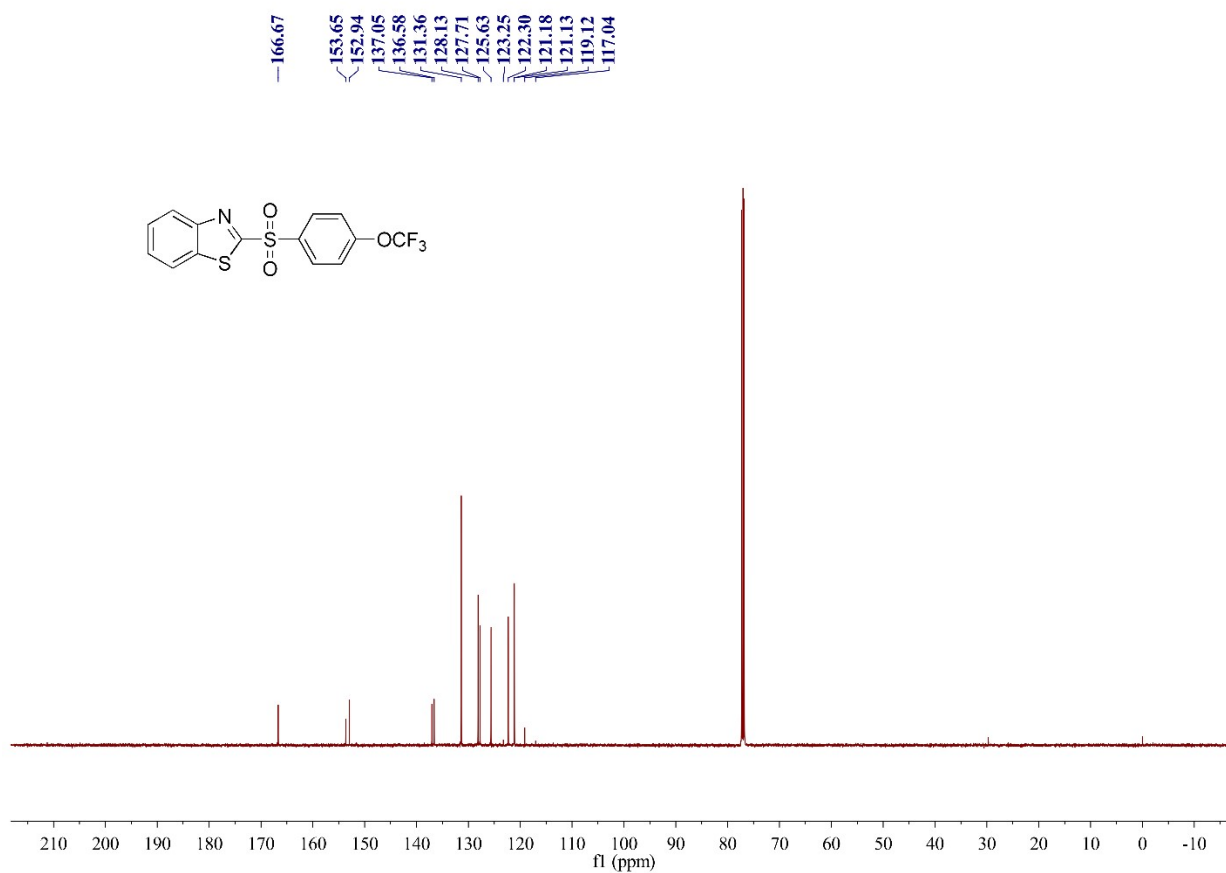

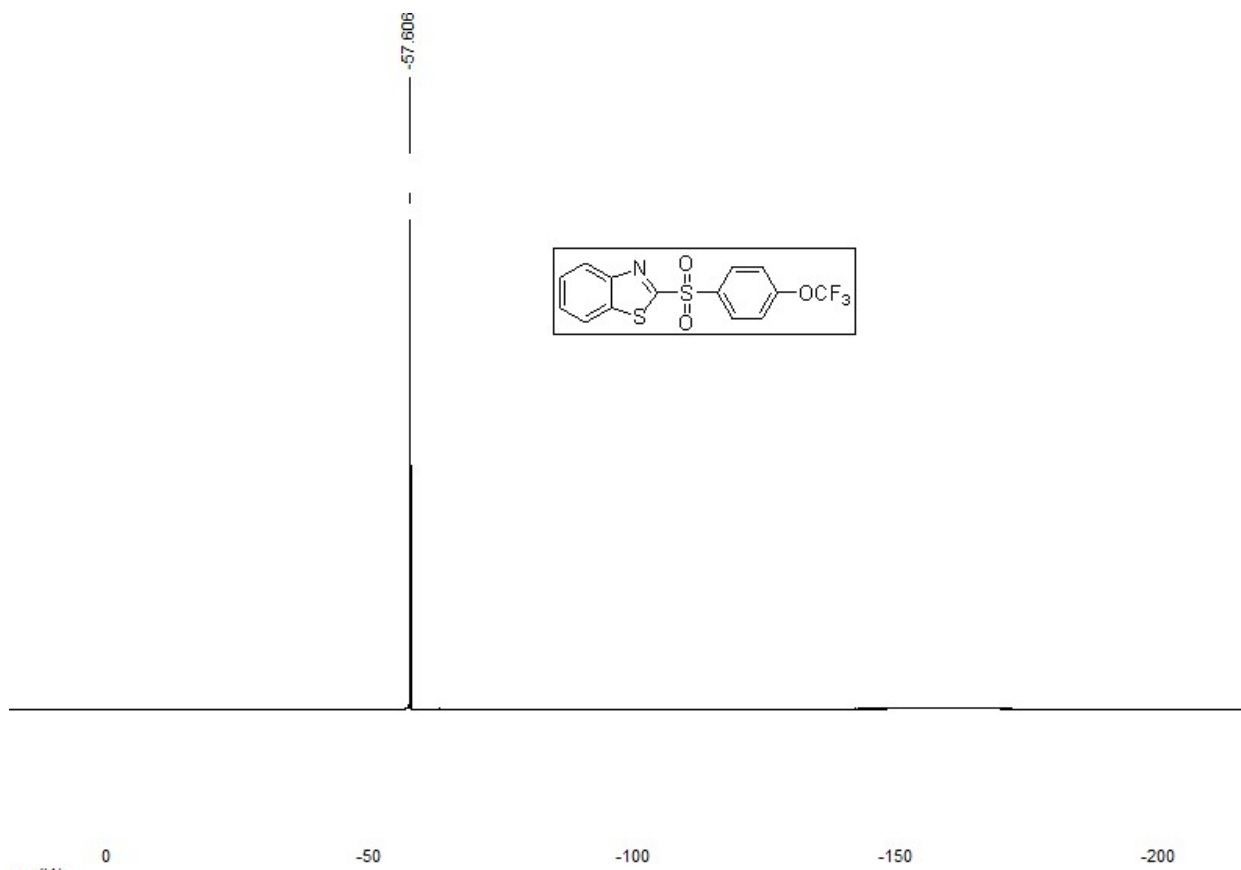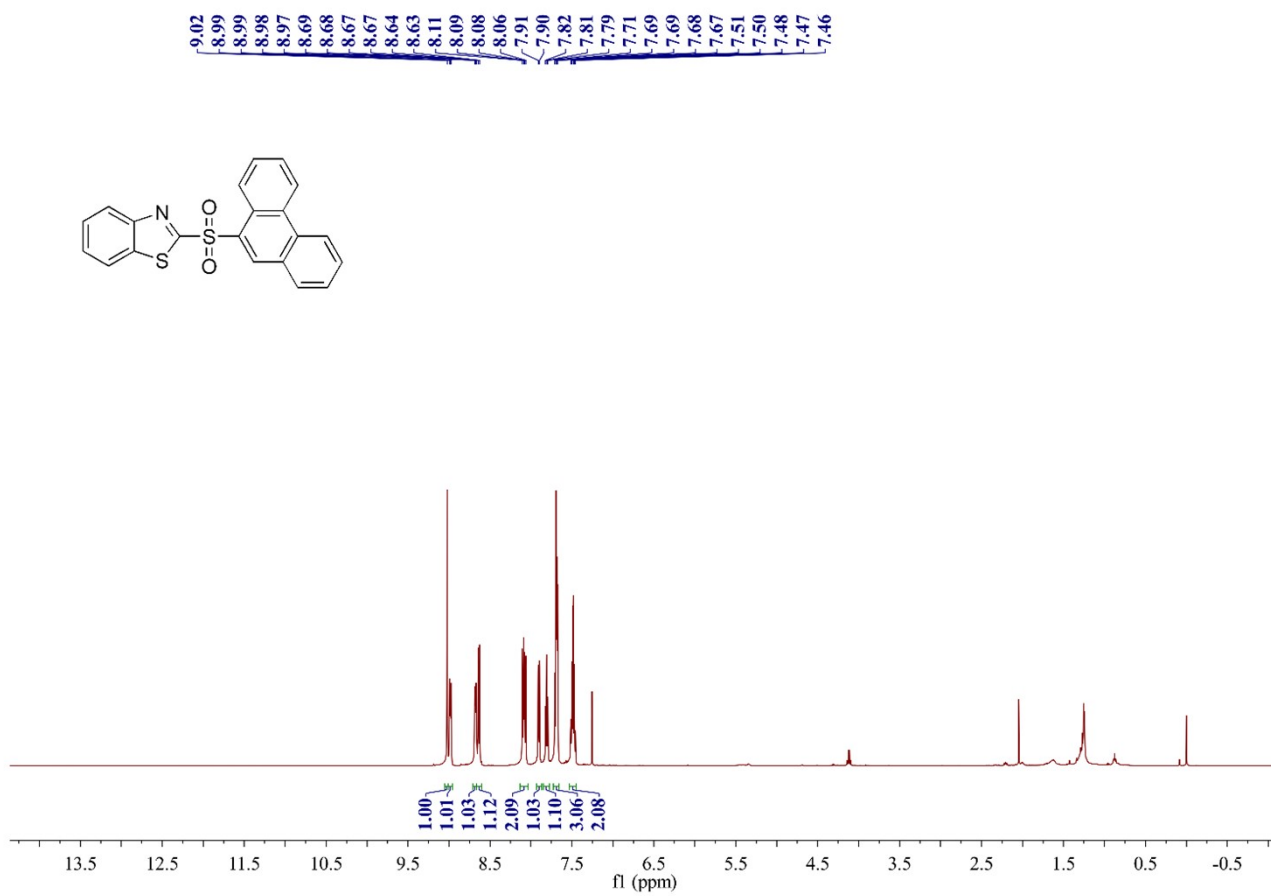



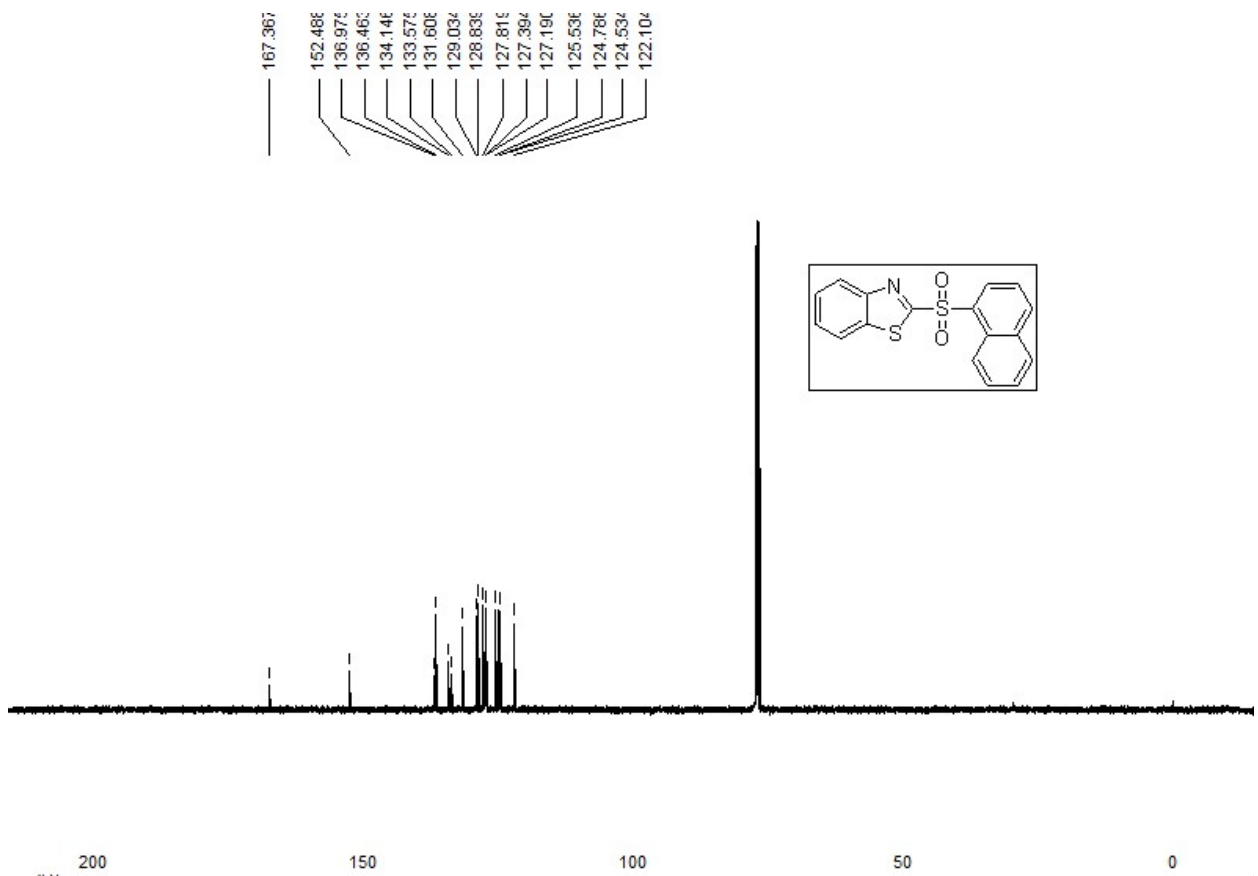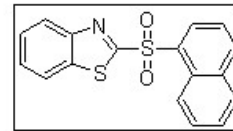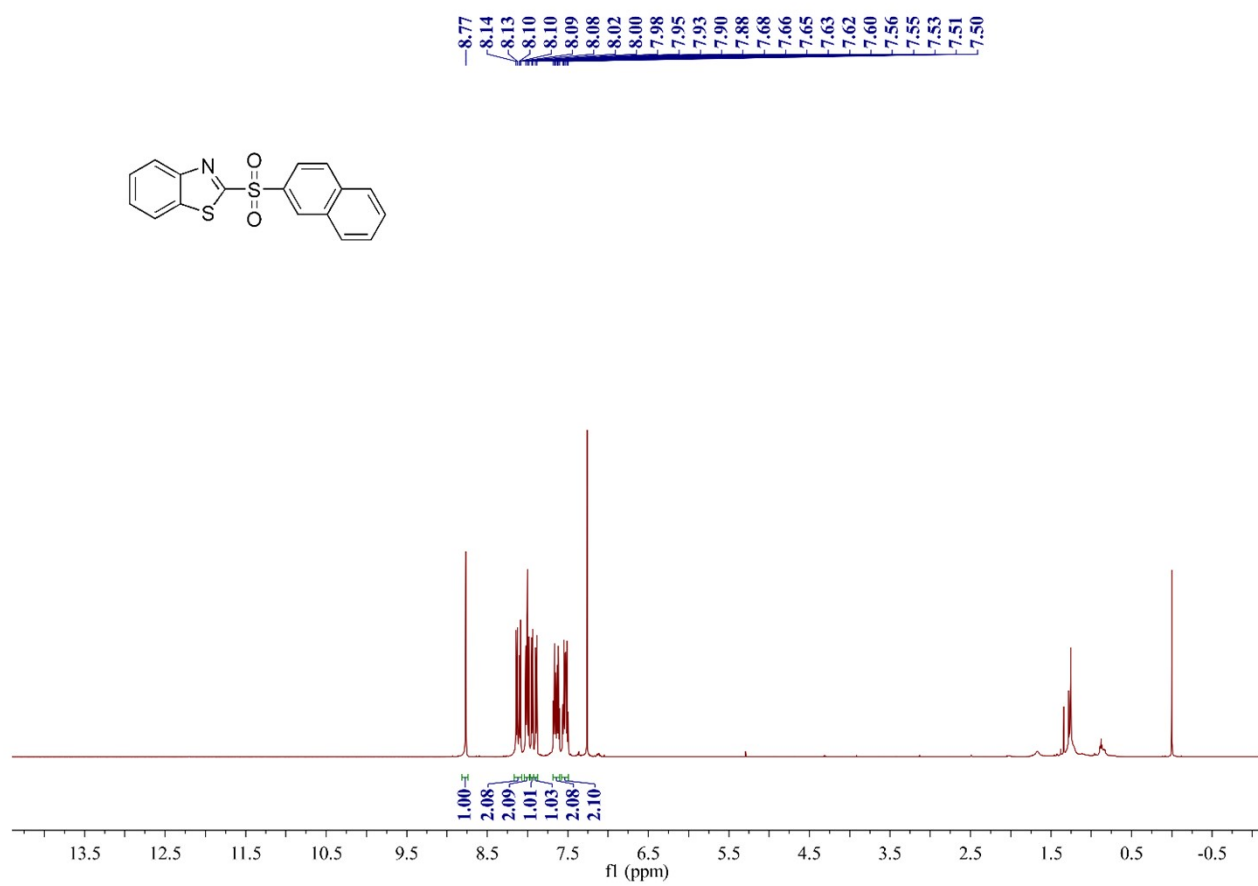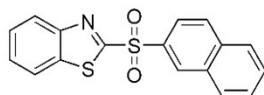

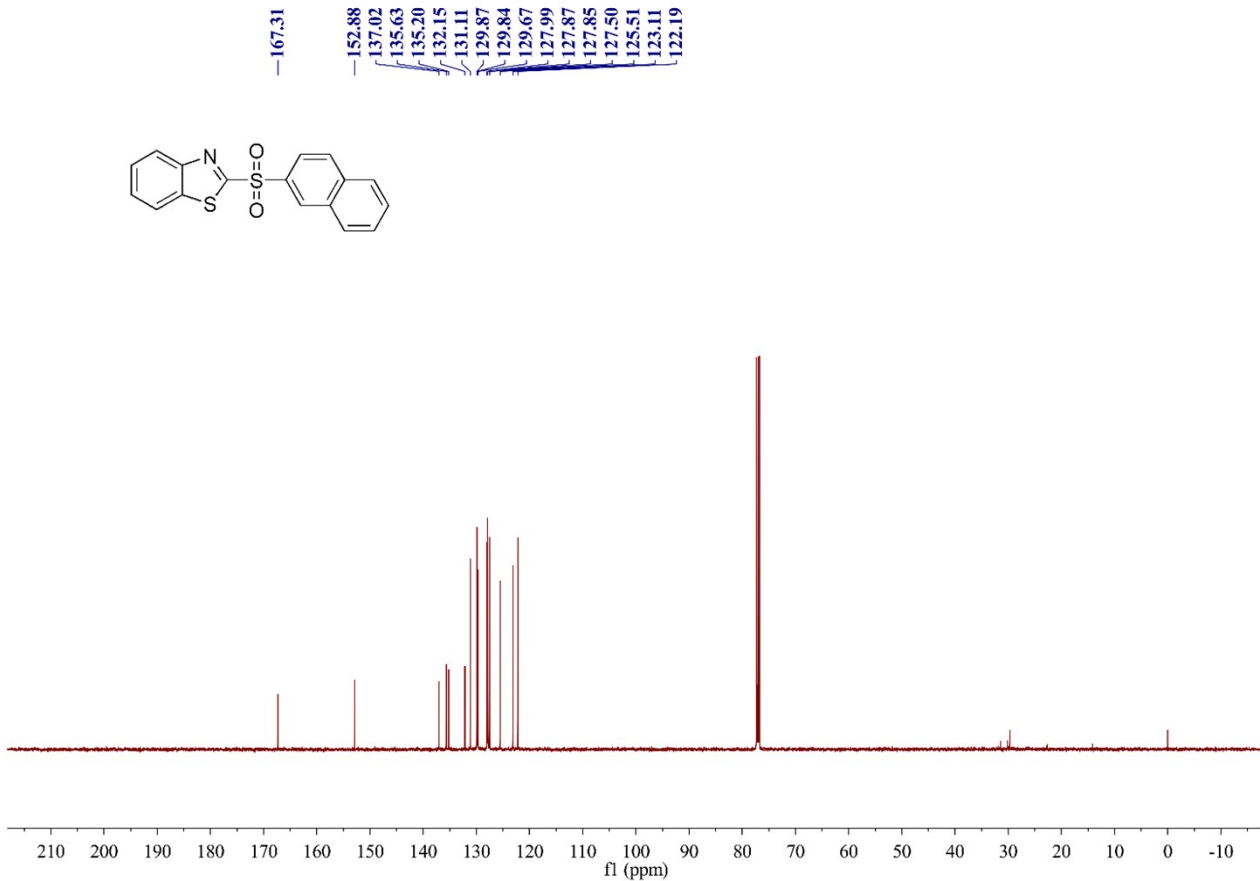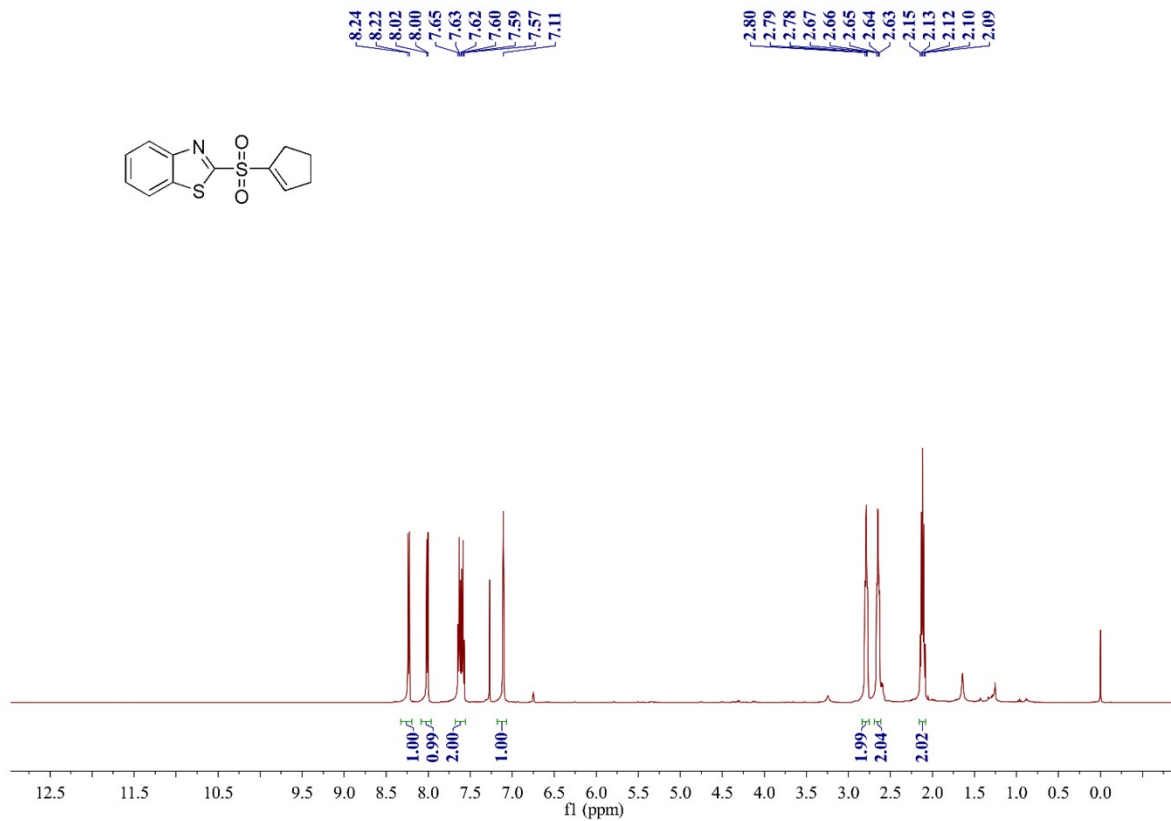

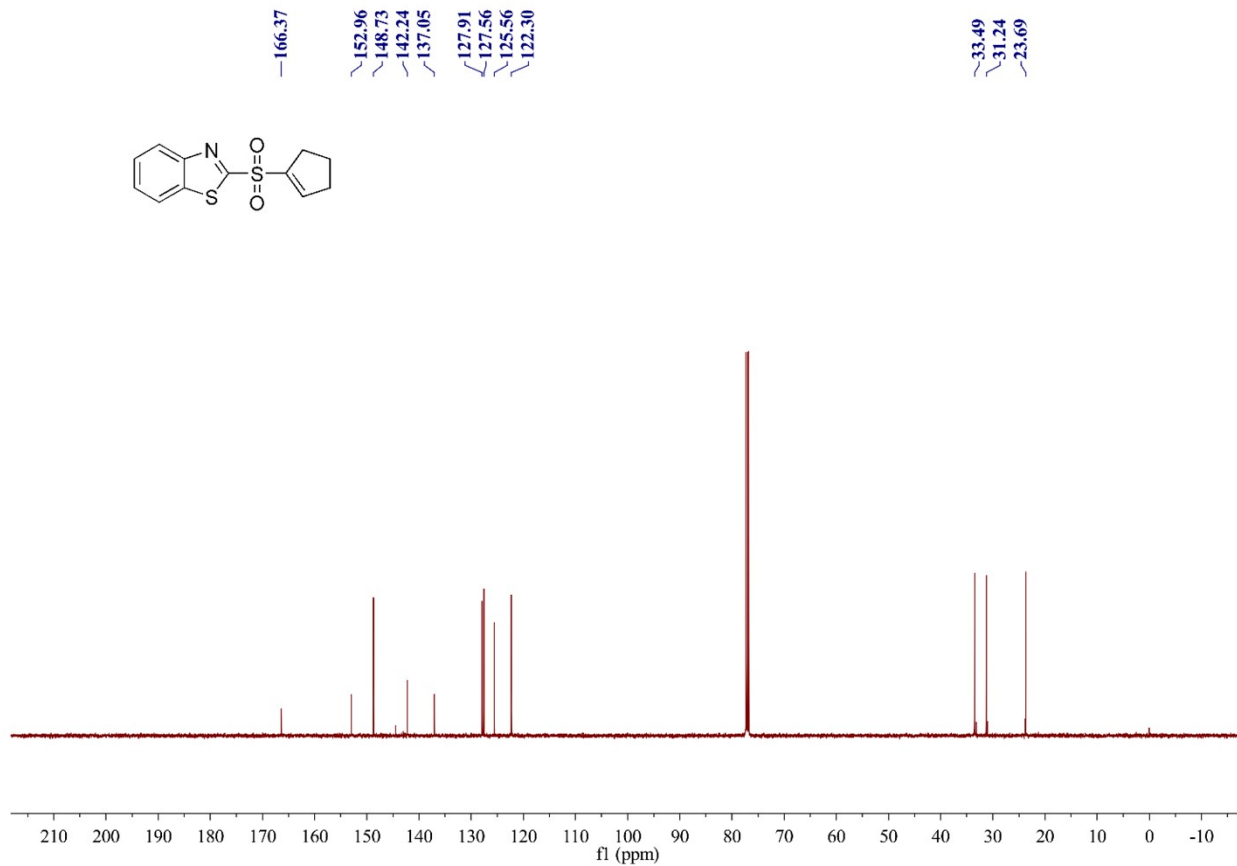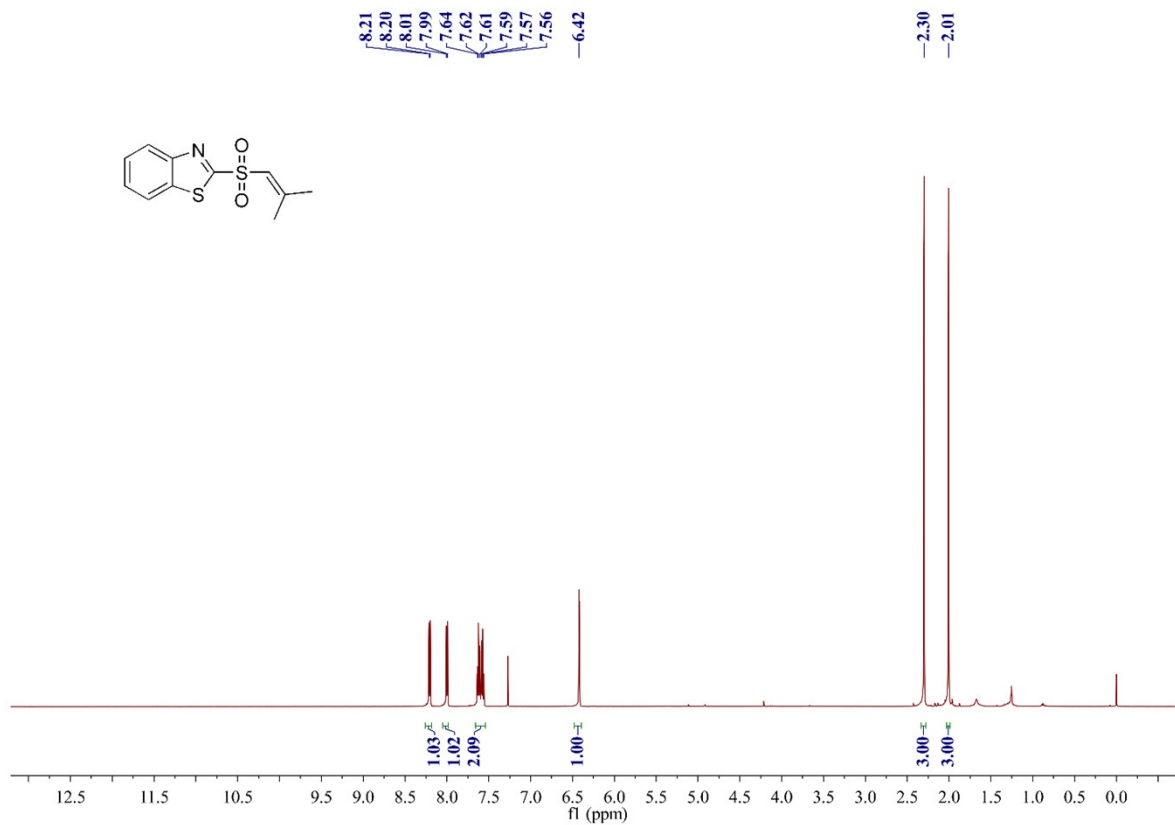

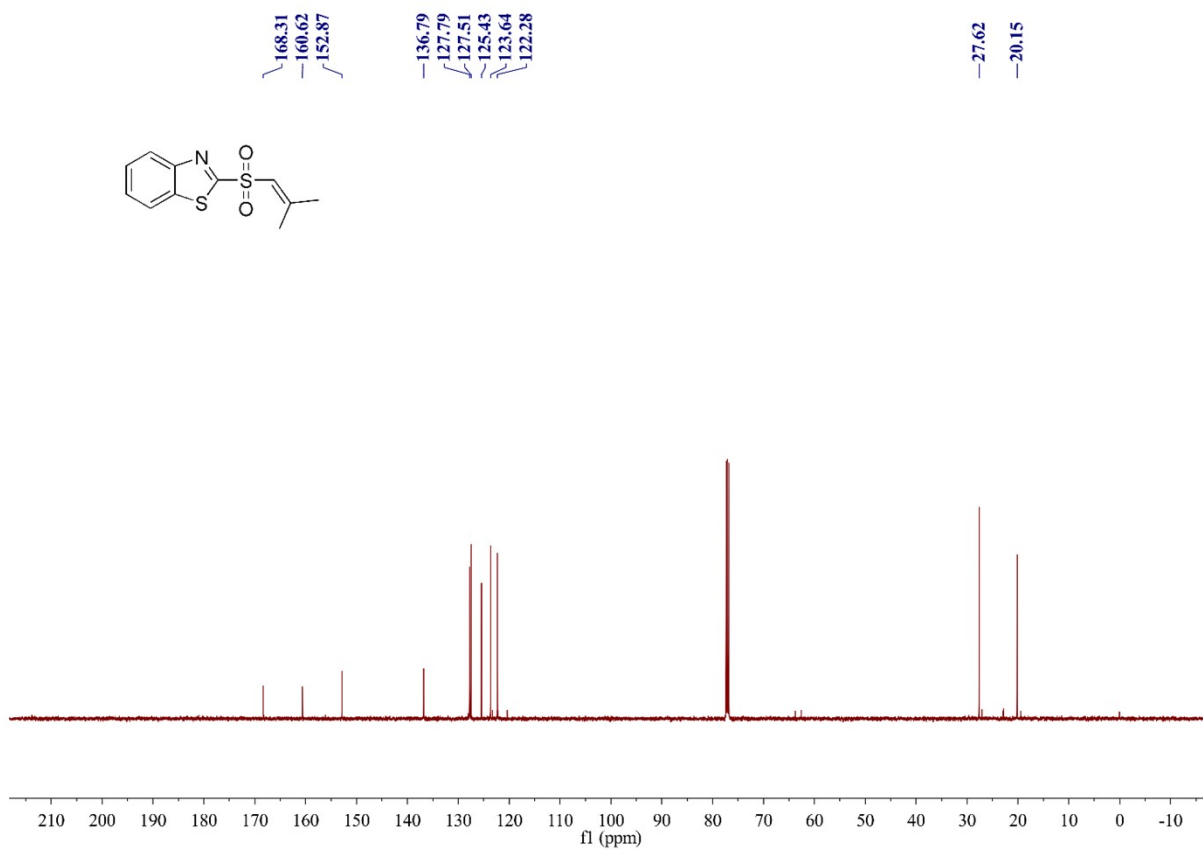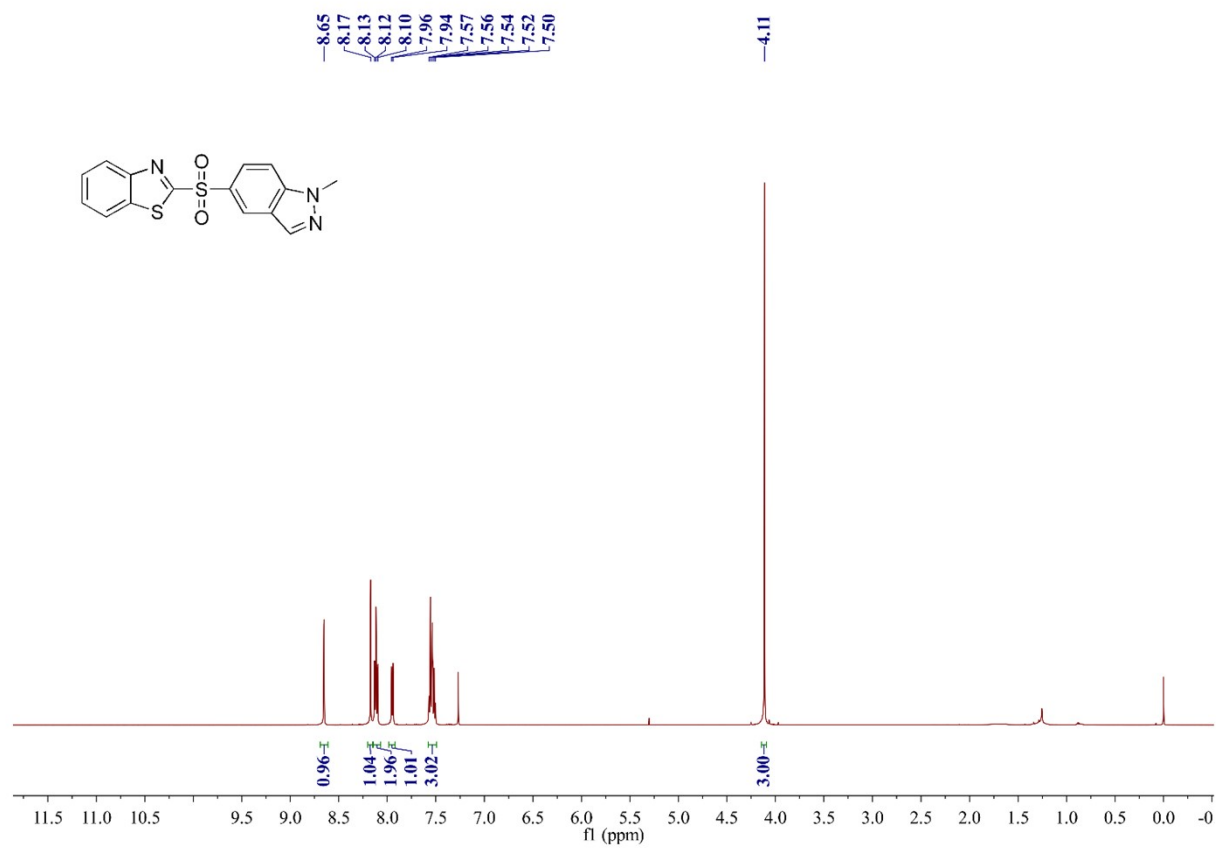



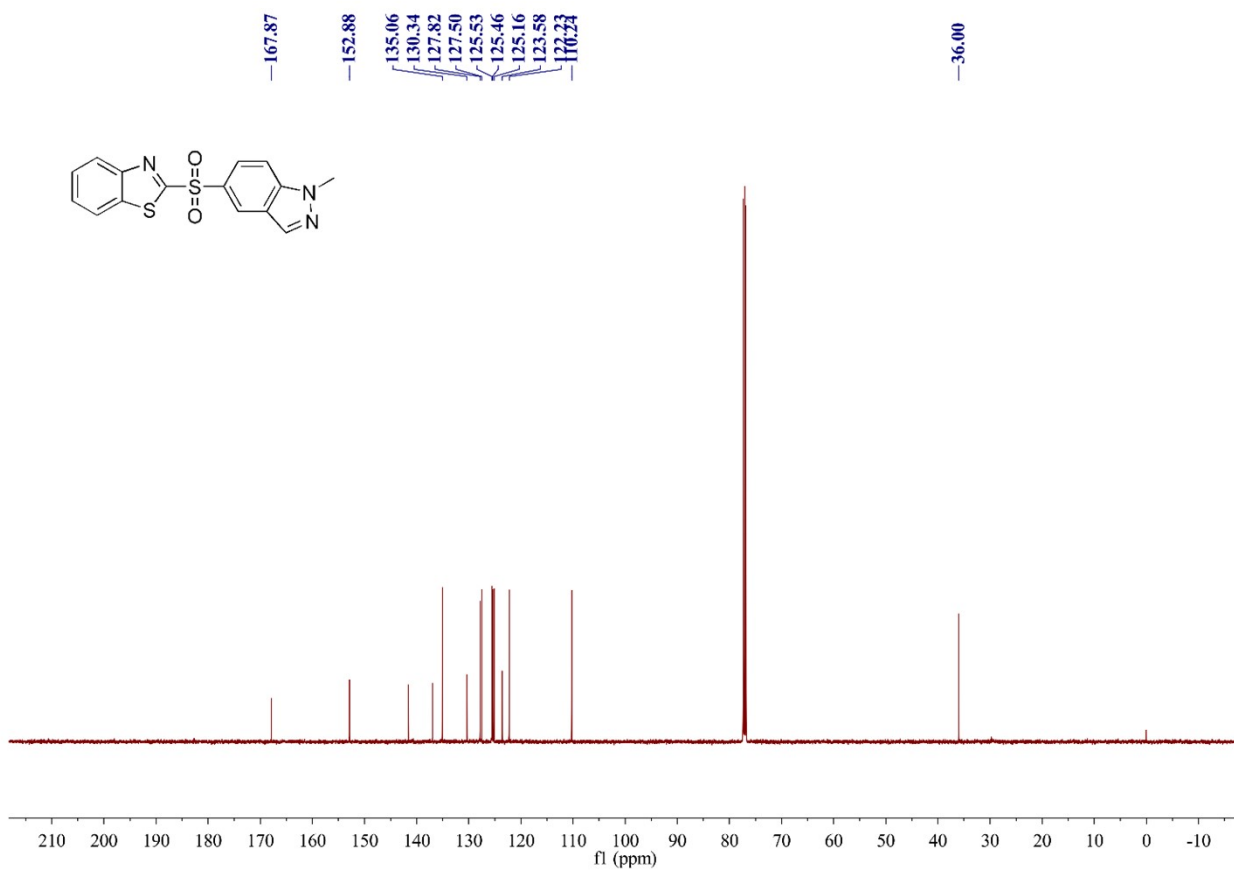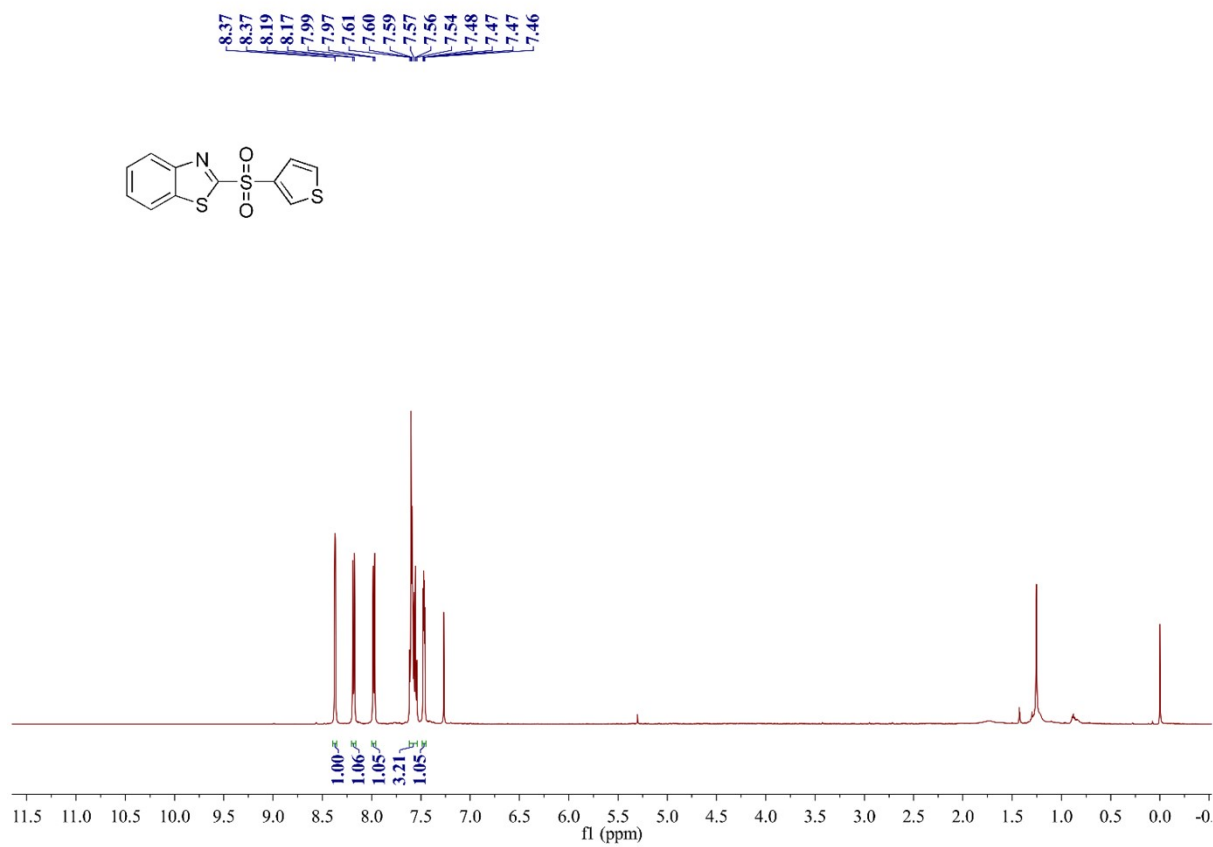

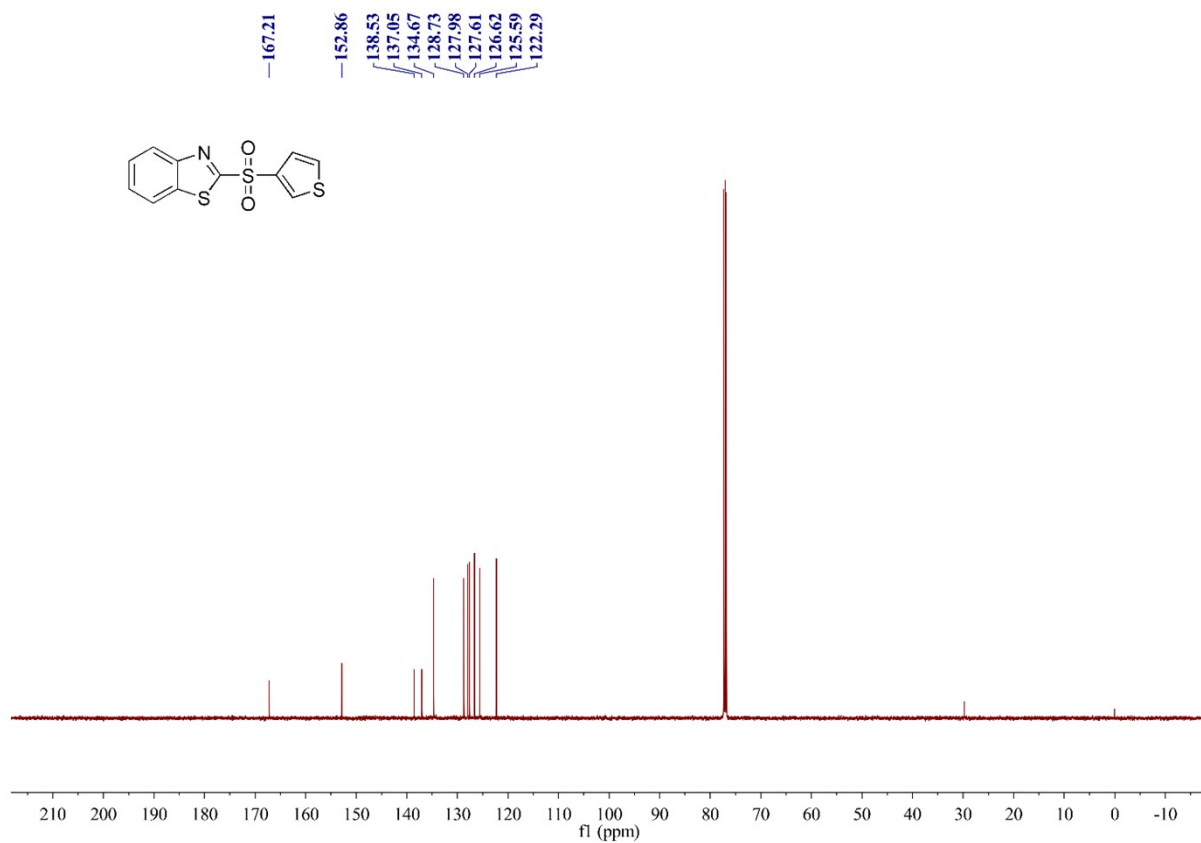

## 5. References

- [1] Z. Xie, H. Li, J. Yang, X. Zhu and Z. Le, *Synthesis*, 2022, **54**, 770-778.
